# Supplementary material for: Ring strain-dictated divergent fluorinating Prins cyclization or semipinacol rearrangement
Source: Royal Society of Chemistry journal article supplement (doi:10.1039/c7ob01567d), 2017-01-01
Supplement: c7ob01567d1.pdf [file c7ob01567d1.pdf]

## Electronic Supplementary Information

### Ring Strain-Dictated Divergent Fluorinating Prins Cyclization or Semipinacol Rearrangement

Yi Liu,<sup>a</sup> Ying-Yeung Yeung<sup>a,b,\*</sup>

<sup>a</sup> Department of chemistry, National University of Singapore, 3 Science Drive 3, Singapore 117543

<sup>b</sup> Department of Chemistry, The Chinese University of Hong Kong, Shatin, NT, Hong Kong (China)

\*Corresponding author: Email: [yeyeung@cuhk.edu.hk](mailto:yeyeung@cuhk.edu.hk); Tel: +852-39436377

#### Table of contents

|                |                                                     |
|----------------|-----------------------------------------------------|
| <b>S2–S11</b>  | <b>Experimental procedures and physical data</b>    |
| <b>S12–S65</b> | <b><sup>1</sup>H and <sup>13</sup>C NMR Spectra</b> |
| <b>S66–S81</b> | <b>X-ray data of 3ab</b>                            |
| <b>S81</b>     | <b>Reference</b>                                    |

## 1. General Information

All reactions that required anhydrous conditions were carried out by standard procedures under nitrogen atmosphere unless otherwise stated. Commercially available reagents were used as received. The solvents were dried by distillation over the appropriate drying reagents. Infrared spectra were recorded on a Varian 3100 FTIR spectrophotometer and reported in wave numbers ( $\text{cm}^{-1}$ ). Melting points were determined on a Stuart SMP3 melting point apparatus.  $^1\text{H}$  NMR and  $^{13}\text{C}$  NMR spectra were recorded on a Bruker ACF300 (300 MHz), Bruker DPX300 (300 MHz) or AMX500 (500 MHz) spectrometer. Chemical shifts ( $\delta$ ) are reported in ppm relative to TMS ( $\delta$  0.00) for the  $^1\text{H}$  NMR and to chloroform ( $\delta$  77.0) for the  $^{13}\text{C}$  NMR measurements. Low resolution mass spectra were obtained on a Finnigan/MAT LCQ spectrometer in ESI mode. High resolution mass spectra were obtained on a Finnigan/MAT 95XL-T spectrometer. Analytical thin layer chromatography (TLC) was performed with Merck pre-coated TLC plates, silica gel 60F-254, layer thickness 0.25 mm. Flash chromatography separations were performed on Merck 60 (0.040-0.063 mm) mesh silica gel.

## 2. Experimental Procedures and physical data

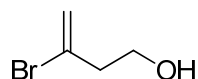

### 3-bromobut-3-en-1-ol (**3**)<sup>1</sup>

2,3-dibromopropene **2** (30 mmol, 6.0 g), paraformaldehyde (900 mg, 30 mmol) and tin powder (60 mmol, 7.08 g) were added to a 100 mL round-bottom flask in mixed solvent (H<sub>2</sub>O/Et<sub>2</sub>O; 30ml/30ml). Then, 48% HBr aqueous solution (0.5 mL) was added. Under nitrogen protection, the resultant mixture was stirred for 24 h at 25 °C. The reaction was diluted with Et<sub>2</sub>O (100 mL) and the organic layer was separated. The aqueous layer was extracted with Et<sub>2</sub>O (3 × 30 mL). The combined organic phases were dried over anhydrous sodium sulfate, filtered, and concentrated under reduced pressure. The residue was purified by silica gel chromatography eluted with hexane/EtOAc (5:1) to yield **3** in 48% yield. Colorless oil. <sup>1</sup>H NMR (500 MHz, CDCl<sub>3</sub>): δ 5.72 (1H), 5.55 (d, *J* = 1 Hz, 1H), 3.83 (t, *J* = 6.5 Hz, 2H), 2.68 (t, *J* = 6.5 Hz, 2H); <sup>13</sup>C NMR (125 MHz, CDCl<sub>3</sub>): δ 130.48, 119.33, 60.06, 44.42.

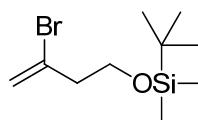

### ((3-bromobut-3-en-1-yl)oxy)(*tert*-butyl)dimethylsilane (**4**)<sup>1</sup>

3-Bromobut-3-en-1-ol (**3**) (2.2 g, 14.6 mmol) was added to a 50 mL round-bottom flask containing anhydrous dichloromethane (30 mL). The mixture was cooled to 0 °C and imidazole (1.49 g, 21.6 mmol) was added. Then, a solution of *tert*-butyldimethylsilyl chloride (3.26 g, 21.6 mmol) dissolved in anhydrous dichloromethane (15 mL) was added dropwise to the reaction mixture over 30 minutes. The resultant was allowed to rise to 25 °C and further stirred for 15 hours. The reaction was quenched by water (50 mL) and the organic layer was separated. The aqueous layer was extracted with dichloromethane (3 × 30 mL). The combined organic phases were dried over anhydrous sodium sulfate, filtered, and concentrated under reduced pressure. The residue was purified by silica gel chromatography eluted with hexane/EtOAc (20:1) to yield **4** in 95% yield. <sup>1</sup>H NMR (300 MHz, CDCl<sub>3</sub>): δ 5.67 (d, *J* = 1.5 Hz, 1H), 5.49 (d, *J* = 1.5 Hz, 1H), 3.83 (t, *J* = 6.3 Hz, 2H), 2.66 (t, *J* = 6.3 Hz, 2H), 0.93 (s, 9H), 0.11 (s, 6H); <sup>13</sup>C NMR (75 MHz, CDCl<sub>3</sub>): δ 130.76, 118.31, 60.76, 44.71, 25.79, 18.21, -5.42.

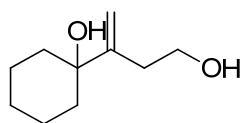

### 1-(4-hydroxybut-1-en-2-yl)cyclohexanol (**1a**)

((3-bromobut-3-en-1-yl)oxy)(*tert*-butyl)dimethylsilane **4** (1.06 g, 4.0 mmol) was added to a 50 mL schlenk flask containing tetrahydrofuran (15 mL) at -78 °C. *n*-butyl lithium (4.8 mmol, 3 ml, 1.6 M in hexane) was added dropwise over 30 minutes. The resultant mixture was stirred for additional 30 minutes at the same temperature. Then, a solution of cyclohexanone (490 mg, 5 mmol) in THF (10 mL) was added dropwise over 30 minutes. The reaction was allowed to warm to 25 °C and stirred for 10 hours. Water (10 mL) was added to quench the reaction and most of THF was removed under reduced pressure. The aqueous layer was extracted with EtOAc (3 × 20 mL). The combined organic phases were dried over anhydrous sodium sulfate, filtered, and concentrated under reduced pressure. The residue was dissolved in THF (10 mL) and transferred to a 25 mL round-bottom flask. A

solution of TBAF (1 M in THF, 5 ml, 5 mmol) was added at 0 °C. The resultant mixture was stirred at 25 °C for 3 hours. The solvent was then removed under reduced pressure and the residue was diluted with water (20 mL). The aqueous layer was extracted with dichloromethane (3 × 20 mL). The combined organic phases were washed with brine (5 mL), dried over anhydrous sodium sulfate, filtered, and concentrated under reduced pressure. The residue was purified by silica gel chromatography eluted with hexane/EtOAc (2:1) to yield **1a** (500 mg, 74%). <sup>1</sup>H NMR (500 MHz, CDCl<sub>3</sub>): δ 5.15 (1H), 4.93 (1H), 3.77 (t, *J* = 6.2 Hz, 2H), 2.42 (t, *J* = 6.1 Hz, 2H), 1.70 – 1.55 (m, 10H); <sup>13</sup>C NMR (125 MHz, CDCl<sub>3</sub>): δ 153.34, 110.99, 73.19, 63.24, 36.53, 34.74, 25.62, 22.07. HRMS (ESI): C<sub>10</sub>H<sub>18</sub>O<sub>2</sub>, calculated for [M+Na]: C<sub>10</sub>H<sub>18</sub>O<sub>2</sub>Na, 193.1199, found 193.1195.

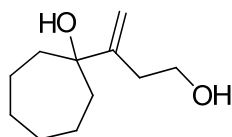

#### 1-(4-hydroxybut-1-en-2-yl)cycloheptanol (**1b**)

((3-bromobut-3-en-1-yl)oxy)(*tert*-butyl)dimethylsilane **4** (1.06 g, 4.0 mmol) was added to a 50 mL schlenk flask containing tetrahydrofuran (15 mL) at -78 °C. *n*-butyl lithium (4.8 mmol, 3 ml, 1.6 M in hexane) was added dropwise over 30 minutes. The resultant mixture was stirred for additional 30 minutes at the same temperature. Then, a solution of cycloheptanone (560 mg, 5 mmol) in THF (10 ml) was added dropwise over 30 minutes. The reaction was allowed to warm to 25 °C and stirred for 10 hours. Water (10 mL) was added to quench the reaction and most of THF was removed under reduced pressure. The aqueous layer was extracted with EtOAc (3 × 20 mL). The combined organic phases were dried over anhydrous sodium sulfate, filtered, and concentrated under reduced pressure. The residue was dissolved in THF (10 mL) and transferred to a 25 mL round-bottom flask. A solution of TBAF (1 M in THF, 5 ml, 5 mmol) was added at 0 °C. The resultant mixture was stirred at 25 °C for 3 hours. Then, most of THF was removed under reduced pressure and water (20 mL) was added. The aqueous layer was extracted with dichloromethane (3 × 20 mL). The combined organic phases were washed with brine (5 mL), dried over anhydrous sodium sulfate, filtered, and concentrated under reduced pressure. The residue was purified by silica gel chromatography eluted with hexane/EtOAc (2:1) to yield **1b** (530 mg, 72%) Colorless oil. IR (cm<sup>-1</sup>): 3348, 2926, 2858, 1634, 1456, 1194, 1037. <sup>1</sup>H NMR (300 MHz, CDCl<sub>3</sub>) δ 4.89 (d, *J* = 1.0 Hz, 1H), 4.66 (d, *J* = 1.0 Hz, 1H), 3.54 (t, *J* = 6.0 Hz, 2H), 2.19 (t, *J* = 6.0, 2H), 1.67 (m, 2H), 1.59 – 1.15 (m, 10H). <sup>13</sup>C NMR (75 MHz, CDCl<sub>3</sub>) δ 153.91, 110.17, 77.19, 63.25, 40.29, 34.78, 29.34, 22.35.

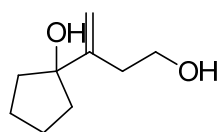

#### 1-(4-hydroxybut-1-en-2-yl)cyclopentanol (**1c**)

((3-bromobut-3-en-1-yl)oxy)(*tert*-butyl)dimethylsilane **4** (1.06 g, 4.0 mmol) was added to a 50 mL schlenk flask containing tetrahydrofuran (15 mL) at -78 °C. *n*-butyl lithium (4.8 mmol, 3 ml, 1.6 M in hexane) was added dropwise over 30 minutes. The resultant mixture was stirred for additional 30 minutes at the same temperature. Then, a solution of cyclopentanone (420 mg, 5 mmol) in THF (10 mL) was added dropwise over 30 minutes. The reaction was allowed to warm to 25 °C and stirred for 10 hours. Water (10 mL) was added to quench the reaction and most of THF was removed under reduced pressure. The aqueous layer was extracted with EtOAc (3 × 20 mL). The combined organic phases were dried over anhydrous sodium sulfate, filtered, and concentrated under

reduced pressure. The residue was dissolved in THF (10 mL) and transferred to a 25 mL round-bottom flask. A solution of TBAF (1 M in THF, 5 mL, 5 mmol) was added at 0 °C. The resultant mixture was stirred at 25 °C for 3 hours. Then, most of THF was removed under reduced pressure and water (20 mL) was added. The aqueous layer was extracted with dichloromethane (3 × 20 mL). The combined organic phases were washed with brine (5 mL), dried over anhydrous sodium sulfate, filtered, and concentrated under reduced pressure. The residue was purified by silica gel chromatography eluted with hexane/EtOAc (2:1) to yield **1c** (424 mg, 68%) Colorless oil. <sup>1</sup>H NMR (500 MHz, CDCl<sub>3</sub>) δ 5.18 (1H), 4.91 (1H), 3.79 (t, *J* = 6 Hz, 2H), 2.44 (t, *J* = 6 Hz, 2H), 1.91 – 1.69 (m, 8 H); <sup>13</sup>C NMR (125 MHz, CDCl<sub>3</sub>) δ 151.28, 110.76, 83.94, 63.03, 38.73, 36.14, 23.30. HRMS (ESI): C<sub>9</sub>H<sub>16</sub>O<sub>2</sub>, calculated for [M+Na]: C<sub>9</sub>H<sub>16</sub>O<sub>2</sub>Na, 179.1043, found: 179.1039.

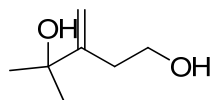

#### 4-methyl-3-methylenepentane-1,4-diol (**1d**)<sup>1</sup>

((3-bromobut-3-en-1-yl)oxy)(*tert*-butyl)dimethylsilane **4** (1.06 g, 4.0 mmol) was added to a 50 mL schlenk flask containing tetrahydrofuran (15 mL) at -78 °C. *n*-butyl lithium (4.8 mmol, 3 mL, 1.6 M in hexane) was added dropwise over 30 minutes. The resultant mixture was stirred for additional 30 minutes at the same temperature. Then, a solution of anhydrous acetone (290 mg, 5 mmol) in THF (10 mL) was added dropwise over 30 minutes. The reaction was allowed to warm to 25 °C and stirred for 10 hours. Water (10 mL) was added to quench the reaction and most of THF was removed under reduced pressure. The aqueous layer was extracted with EtOAc (3 × 20 mL). The combined organic phases were dried over anhydrous sodium sulfate, filtered, and concentrated under reduced pressure. The residue was dissolved in THF (10 mL) and transferred to a 25 mL round-bottom flask. A solution of TBAF (1 M in THF, 5 mL, 5 mmol) was added at 0 °C. The resultant mixture was stirred at 25 °C for 3 hours. Then, most of THF was removed under reduced pressure and water (20 mL) was added. The aqueous layer was extracted with dichloromethane (3 × 20 mL). The combined organic phases were washed with brine (5 mL), dried over anhydrous sodium sulfate, filtered, and concentrated under reduced pressure. The residue was purified by silica gel chromatography eluted with hexane/EtOAc (2:1) to yield **1d** (234 mg, 45%). <sup>1</sup>H NMR (500 MHz, CDCl<sub>3</sub>) δ 5.14 (1H), 4.86 (1H), 3.78 (t, *J* = 6.5 Hz, 2H), 2.42 (t, *J* = 6.5 Hz, 2H), 1.38 (s, 6H); <sup>13</sup>C NMR (125 MHz, CDCl<sub>3</sub>) δ 153.29, 110.06, 72.69, 63.05, 34.71, 29.47. HRMS (ESI): C<sub>7</sub>H<sub>14</sub>O<sub>2</sub>, calculated for [M+Na]: C<sub>7</sub>H<sub>14</sub>O<sub>2</sub>Na, 153.0886, found: 153.0883.

#### Representative procedure for the fluorinating Prins cyclization or semi-pinacol rearrangement

To a solution of **1a** (34 mg, 0.2 mmol) and benzaldehyde **6a** (25 mg, 0.24 mmol) in CH<sub>2</sub>Cl<sub>2</sub> (10 mL) in a 25 mL Schlenk flask at -20 °C was added 3 equivalent of BF<sub>3</sub>•Et<sub>2</sub>O (0.6 mmol, 85 mg) slowly under N<sub>2</sub> protection. The resultant mixture was stirred at -20 °C for 6 hours. The solvent was removed under reduced pressure and the residue was purified by flash column chromatography on silica gel eluted with hexane/EtOAc (2:1) to give **7aa** in 73% yield.

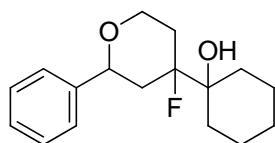

#### 1-(4-fluoro-2-phenyltetrahydro-2H-pyran-4-yl)cyclohexanol (**7aa**)

Yield: 73%. Colorless oil.  $^1\text{H}$  NMR (300 MHz,  $\text{CDCl}_3$ ):  $\delta$  7.41 – 7.28 (m, 5H), 4.74 – 4.69 (1H), 4.14 – 4.12 (1H), 3.97 – 3.96 (1H), 2.12 – 1.37 (m, 14H);  $^{13}\text{C}$  NMR (75 MHz,  $\text{CDCl}_3$ ):  $\delta$  142.28, 128.35, 127.51, 125.72, 99.97, 97.66, 77.39, 76.96, 76.54, 75.17, 74.22, 73.94, 63.83, 37.65, 37.36, 30.71, 30.66, 30.63, 30.58, 29.23, 28.93, 25.59, 21.13. HRMS (ESI):  $\text{C}_{17}\text{H}_{23}\text{FO}_2$ , calculated for  $[\text{M}-\text{H}]$  277.1609, found 277.1602.

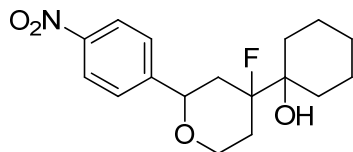

**1-(4-fluoro-2-(4-nitrophenyl)tetrahydro-2H-pyran-4-yl)cyclohexanol (7ab)**

Yield: 69%. White solid. Melting point: 114 °C.  $^1\text{H}$  NMR (300 MHz,  $\text{CDCl}_3$ ):  $\delta$  8.23 (d,  $J$  = 9 Hz, 2H), 7.56 (d,  $J$  = 9 Hz, 2H), 4.82 – 4.78 (dd,  $J$  = 3.5 Hz, 11.4 Hz, 1H), 4.19 – 4.14 (m, 1H), 3.97 – 3.95 (m, 1H), 2.23 – 1.23 (m, 14H);  $^{13}\text{C}$  NMR (75 MHz,  $\text{CDCl}_3$ ):  $\delta$  149.79, 147.14, 126.34, 123.57, 99.54, 97.22, 63.77, 37.59, 37.30, 30.62, 30.58, 29.13, 28.84, 25.51, 21.07. HRMS (ESI):  $\text{C}_{17}\text{H}_{22}\text{FNO}_4$ , calculated for  $[\text{M}-\text{H}]$ : 322.1460, found: 322.1462.

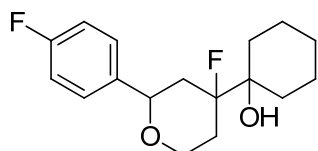

**1-(4-fluoro-2-(4-fluorophenyl)tetrahydro-2H-pyran-4-yl)cyclohexanol (7ac)**

Yield: 75%. White solid. Melting point: 79 °C.  $^1\text{H}$  NMR (300 MHz,  $\text{CDCl}_3$ ):  $\delta$  7.39 – 7.34 (m, 2H), 7.09 – 7.03 (m, 2H), 4.71 – 4.66 (dd,  $J$  = 2.1 Hz, 11.4 Hz, 1H), 4.12 – 4.09 (m, 1H), 3.95 – 3.94 (m, 1H), 1.97 – 1.39 (m, 14H),  $^{13}\text{C}$  NMR (75 MHz,  $\text{CDCl}_3$ ):  $\delta$  163.72, 160.47, 138.11, 138.07, 127.48, 127.37, 115.27, 114.99, 99.86, 97.55, 74.54, 74.16, 73.88, 63.83, 37.59, 37.31, 30.65, 30.61, 30.57, 29.18, 28.89, 25.56, 21.11. HRMS (ESI):  $\text{C}_{17}\text{H}_{21}\text{F}_2\text{O}_2$ , calculated for  $[\text{M}-\text{H}]$ : 295.1515, found: 295.1514.

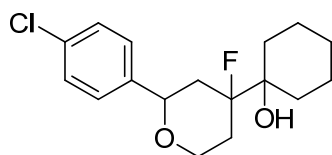

**1-(2-(4-chlorophenyl)-4-fluorotetrahydro-2H-pyran-4-yl)cyclohexanol (7ad)**

Yield: 77%. White solid. Melting point: 96 °C.  $^1\text{H}$  NMR (500 MHz,  $\text{CDCl}_3$ ):  $\delta$  7.35 – 7.29 (m, 4H), 4.68 – 4.65 (dd,  $J$  = 2 Hz, 11.5 Hz, 1H), 4.12 – 4.10 (m, 1H), 3.96 – 3.93 (m, 1H), 2.15 – 1.38 (m);  $^{13}\text{C}$  NMR (125 MHz,  $\text{CDCl}_3$ ):  $\delta$  140.96, 133.21, 128.51, 127.16, 99.41, 98.03, 74.54, 74.19, 74.02, 63.89, 37.62, 37.44, 30.76, 30.73, 30.69, 29.22, 29.05, 25.65, 21.02. HRMS (ESI):  $\text{C}_{17}\text{H}_{22}\text{ClFO}_2$ , calculated for  $[\text{M}-\text{H}]$ : 311.1220, found: 311.1229.

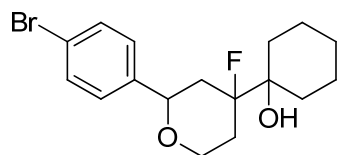

**1-(2-(4-bromophenyl)-4-fluorotetrahydro-2H-pyran-4-yl)cyclohexanol (7ae)**

Yield: 72%. White solid. Melting point: 102 °C.  $^1\text{H}$  NMR (300 MHz,  $\text{CDCl}_3$ ):  $\delta$  7.52 – 7.48 (m, 2H), 7.30 – 7.26 (m, 2H), 4.69 – 4.64 (dd,  $J = 2.4$  Hz, 11.7 Hz, 1H), 4.13 – 4.10 (m, 1H), 3.95 – 3.94 (m, 1H), 1.99 – 1.39 (m, 14H);  $^{13}\text{C}$  NMR (75 MHz,  $\text{CDCl}_3$ ):  $\delta$  141.39, 131.41, 127.42, 121.22, 99.79, 97.48, 74.48, 74.17, 73.89, 63.80, 37.57, 37.28, 30.68, 30.63, 30.59, 29.18, 28.89, 25.56, 21.11. HRMS (ESI):  $\text{C}_{17}\text{H}_{22}\text{BrFO}_2$ , calculated for  $[\text{M}-\text{H}]$ : 355.0714, found: 355.0702.

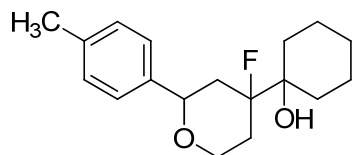

#### 1-(4-fluoro-2-(p-tolyl))tetrahydro-2H-pyran-4-yl)cyclohexanol (7af)

Yield: 68%. White solid. Melting point: 103 – 105 °C.  $^1\text{H}$  NMR (300 MHz,  $\text{CDCl}_3$ ):  $\delta$  7.32 – 7.18 (m, 4H), 4.71 – 4.67 (m, 1H), 4.16 – 4.11 (m, 1H), 4.01 – 3.92 (m, 1H), 2.39 – 1.13 (m, 14H);  $^{13}\text{C}$  NMR (75 MHz,  $\text{CDCl}_3$ ):  $\delta$  139.33, 137.14, 129.01, 125.71, 100.03, 97.73, 75.06, 74.21, 73.92, 63.84, 37.64, 37.35, 30.71, 30.66, 30.62, 30.57, 29.22, 28.93, 25.63, 21.15, 21.06. HRMS (ESI):  $\text{C}_{18}\text{H}_{25}\text{FO}_2$ , calculated for  $[\text{M}-\text{H}]$ : 291.1766, found: 291.1777.

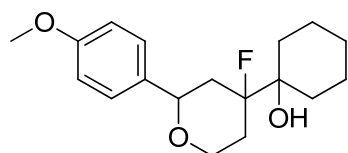

#### 1-(4-fluoro-2-(4-methoxyphenyl))tetrahydro-2H-pyran-4-yl)cyclohexanol (7ag)

Yield: 69%. White solid. Melting point: 70 °C.  $^1\text{H}$  NMR (300 MHz,  $\text{CDCl}_3$ ):  $\delta$  7.33 – 7.30 (m, 2H), 6.92 – 6.89 (m, 2H), 4.67 – 4.63 (dd,  $J = 1.8$  Hz, 11.4 Hz, 1H), 4.11 – 4.08 (m, 1H), 3.99 – 3.94 (m, 1H), 3.82 (s, 3H), 2.14 – 1.15 (m, 14H).  $^{13}\text{C}$  NMR (75 MHz,  $\text{CDCl}_3$ ):  $\delta$  158.98, 134.43, 127.09, 113.72, 100.02, 97.72, 74.83, 74.19, 73.92, 63.83, 55.19, 37.44, 37.16, 30.67, 30.59, 30.55, 29.20, 28.91, 25.61, 21.14. HRMS (ESI):  $\text{C}_{18}\text{H}_{25}\text{FO}_3$ , calculated for  $[\text{M}-1]$ : 307.1715, found: 307.1722.

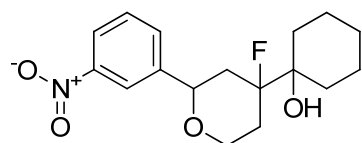

#### 1-(4-fluoro-2-(3-nitrophenyl))tetrahydro-2H-pyran-4-yl)cyclohexanol (7ah)

Yield: 71%. Colorless oil.  $^1\text{H}$  NMR (500 MHz,  $\text{CDCl}_3$ ):  $\delta$  8.30 – 8.21 (m, 2H), 7.53 – 7.49 (m, 2H), 4.65 – 4.62 (1H), 4.10 – 4.09 (m, 1H), 3.86 – 3.83 (m, 1H), 3.86 – 0.86 (m, 14H);  $^{13}\text{C}$  NMR (125 MHz,  $\text{CDCl}_3$ ):  $\delta$  148.37, 144.69, 131.89, 129.31, 122.44, 120.83, 99.19, 97.80, 74.17, 74.10, 73.99, 63.89, 37.53, 37.36, 30.71, 30.69, 30.66, 29.16, 28.99, 25.60, 21.16. HRMS (ESI):  $\text{C}_{17}\text{H}_{22}\text{FNO}_4$ , calculated for  $[\text{M}-\text{H}]$ : 322.1460, found: 322.1469.

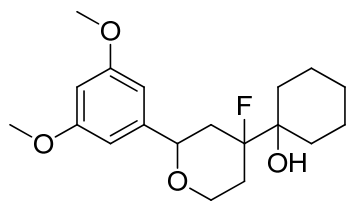

**1-(2-(3,5-dimethoxyphenyl)-4-fluorotetrahydro-2H-pyran-4-yl)cyclohexanol (7ai)**

Yield: 56%. Colorless oil.  $^1\text{H}$  NMR (300 MHz,  $\text{CDCl}_3$ ):  $\delta$  6.56-6.55 (d,  $J = 2.4$  Hz, 2H), 6.41 – 6.40 (d,  $J = 2.4$  Hz, 1H), 4.66 – 4.61 (dd,  $J = 2.1$  Hz, 11.4 Hz, 1H), 4.15 – 4.09 (m, 1H), 3.97 – 3.88 (m, 1H), 3.82 (s, 6H), 2.17 – 1.15 (m, 14H);  $^{13}\text{C}$  NMR (75 MHz,  $\text{CDCl}_3$ ):  $\delta$  160.77, 144.78, 103.55, 99.97, 99.63, 97.66, 75.19, 74.19, 73.91, 63.78, 55.27, 37.69, 37.41, 30.69, 30.64, 30.59, 30.55, 29.17, 28.88, 25.59, 21.12. HRMS (ESI):  $\text{C}_{19}\text{H}_{27}\text{FO}_4$ , calculated for [M-1]: 337.1821, found: 337.1829.

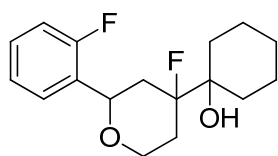

**1-(4-fluoro-2-(2-fluorophenyl)tetrahydro-2H-pyran-4-yl)cyclohexanol (7aj)**

Yield: 71%. Colorless oil.  $^1\text{H}$  NMR (500 MHz,  $\text{CDCl}_3$ ):  $\delta$  7.51 – 7.02 (m, 4H), 5.03 – 5.00 (dd,  $J = 1.5$  Hz, 11 Hz, 1H), 4.13 – 4.11 (m, 1H), 3.98 – 3.96 (m, 1H), 2.30 – 1.39 (m, 14H),  $^{13}\text{C}$  NMR (125 MHz,  $\text{CDCl}_3$ ):  $\delta$  160.40, 158.44, 129.58, 129.48, 128.93, 128.86, 127.29, 127.26, 124.31, 124.28, 115.31, 115.14, 99.31, 97.92, 74.22, 74.04, 69.38, 64.03, 36.42, 36.25, 30.77, 30.74, 30.71, 30.68, 29.30, 29.12, 25.68, 21.22, 21.20. HRMS (ESI):  $\text{C}_{17}\text{H}_{22}\text{F}_2\text{O}_2$ , calculated for [M-H]: 295.1515, found: 295.1524.

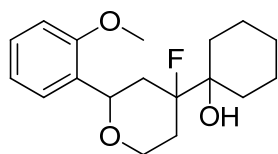

**1-(4-fluoro-2-(2-methoxyphenyl)tetrahydro-2H-pyran-4-yl)cyclohexanol (7ak)**

Yield: 59%. Colorless oil.  $^1\text{H}$  NMR (300 MHz,  $\text{CDCl}_3$ ):  $\delta$  7.51 – 7.49 (m, 1H), 7.30 – 7.24 (m, 1H), 7.04 – 6.88 (m, 2H), 5.12 – 5.08 (dd,  $J = 1.5$  Hz, 11.1 Hz, 1H), 4.13 – 3.97 (m, 2H), 3.87 (s, 3H), 2.26 – 1.16 (m, 14 H);  $^{13}\text{C}$  NMR (75 MHz,  $\text{CDCl}_3$ ):  $\delta$  155.60, 130.79, 128.17, 126.17, 120.68, 110.15, 100.09, 97.78, 74.29, 74.01, 69.56, 63.91, 55.28, 36.16, 35.88, 30.75, 30.70, 30.64, 30.59, 29.43, 29.14, 25.65, 21.18, 21.15. HRMS (ESI):  $\text{C}_{18}\text{H}_{25}\text{FO}_3$ , calculated for [M-H]: 307.1715, found: 307.1722.

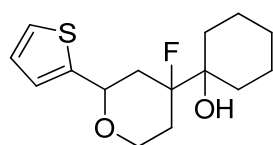

**1-(4-fluoro-2-(thiophen-2-yl)tetrahydro-2H-pyran-4-yl)cyclohexanol (7al)**

Yield: 67%. White solid. Melting point: 98 °C.  $^1\text{H}$  NMR (500 MHz,  $\text{CDCl}_3$ ):  $\delta$  7.28 – 7.26 (m, 1H), 7.01 – 6.97 (m, 2H),



4.97 – 4.93 (m, 1H), 4.09 – 3.94 (m, 2H), 2.40 – 1.15 (m, 14H);  $^{13}\text{C}$  NMR (125 MHz,  $\text{CDCl}_3$ ):  $\delta$  145.50, 126.49, 124.65, 123.61, 99.41, 98.02, 74.21, 74.04, 71.40, 64.03, 37.49, 37.32, 30.72, 29.20, 29.03, 25.67, 21.22. HRMS (ESI):  $\text{C}_{15}\text{H}_{21}\text{FO}_2\text{S}$ , calculated for [M-H]: 283.1174, found: 283.1179.

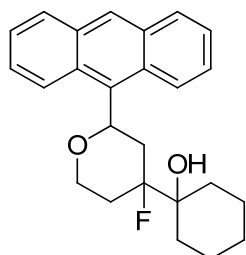

**1-(2-(anthracen-9-yl)-4-fluorotetrahydro-2H-pyran-4-yl)cyclohexanol (7am)**

Yield: 68%. Light yellow color. Melting point: 140 °C.  $^1\text{H}$  NMR (300 MHz,  $\text{CDCl}_3$ ):  $\delta$  8.80 – 8.60 (2H), 8.46 (1H), 8.06 – 8.02 (2H), 7.58 – 7.49 (m, 4H), 6.30 – 6.25 (dd,  $J = 2.4$  Hz, 12 Hz, 1H), 4.50 – 4.40 (m, 2H), 2.24 – 1.43 (m, 14H);  $^{13}\text{C}$  NMR (125 MHz,  $\text{CDCl}_3$ ):  $\delta$  132.16, 131.64, 129.28, 129.12, 128.23, 125.66, 124.67, 100.30, 97.99, 74.30, 74.02, 72.99, 64.66, 35.40, 35.11, 30.72, 30.67, 30.59, 30.55, 29.46, 29.17, 25.55, 21.16, 21.09. HRMS (ESI):  $\text{C}_{25}\text{H}_{27}\text{FO}_2$ , calculated for [M-H]: 377.1922, found: 377.1918.

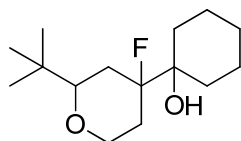

**1-(2-(tert-butyl)-4-fluorotetrahydro-2H-pyran-4-yl)cyclohexanol (7an)**

Yield: 61%. White solid. Melting point: 63 °C.  $^1\text{H}$  NMR (500 MHz,  $\text{CDCl}_3$ ):  $\delta$  3.97-3.94 (dd,  $J = 5.5$  Hz, 12 Hz, 1H), 3.73 – 3.68 (m, 1H), 3.26 – 3.23 (m, 1H), 1.94 – 1.14 (m, 14H), 0.91 (s, 9H);  $^{13}\text{C}$  NMR (125 MHz,  $\text{CDCl}_3$ ):  $\delta$  100.09, 98.71, 80.52, 74.47, 74.29, 63.72, 63.68, 33.83, 30.81, 30.78, 29.72, 29.54, 29.42, 29.24, 26.02, 25.92, 25.72, 21.27. HRMS (ESI):  $\text{C}_{15}\text{H}_{27}\text{FO}_2$ , calculated for [M-H]: 257.1922, found: 257.1926.

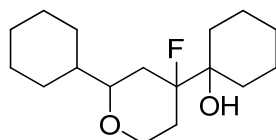

**1-(2-cyclohexyl-4-fluorotetrahydro-2H-pyran-4-yl)cyclohexanol (7ao)**

Yield: 63%. White solid. Melting point: 64 °C.  $^1\text{H}$  NMR (500 MHz,  $\text{CDCl}_3$ ):  $\delta$  4.00 – 3.90 (1H), 3.70 – 3.69 (1H), 3.50 – 3.40 (1H), 1.92 – 1.01 (m, 25H);  $^{13}\text{C}$  NMR (125 MHz,  $\text{CDCl}_3$ ):  $\delta$  99.72, 98.34, 74.37, 74.19, 63.55, 43.00, 32.18, 32.00, 30.76, 30.74, 29.77, 29.59, 28.82, 28.64, 26.56, 26.21, 26.15. HRMS (ESI):  $\text{C}_{17}\text{H}_{29}\text{FO}_2$ , calculated for [M-H]: 283.2632, found: 283.2636.

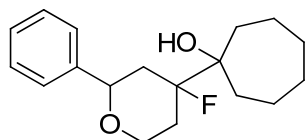

**1-(4-fluoro-2-phenyltetrahydro-2H-pyran-4-yl)cycloheptanol (7ba)**

Yield: 47%. Colorless oil.  $^1\text{H}$  NMR (300 MHz,  $\text{CDCl}_3$ ):  $\delta$  7.42 – 7.32 (m, 5H), 4.73 – 4.68 (dd,  $J$  = 2.4 Hz, 11.4 Hz, 1H), 4.14 – 3.95 (m, 2H), 2.18 – 1.54 (m, 16H);  $^{13}\text{C}$  NMR (75 MHz,  $\text{CDCl}_3$ ):  $\delta$  142.27, 128.37, 127.52, 125.71, 100.90, 98.59, 75.18, 63.85, 37.95, 37.67, 35.21, 35.16, 35.10, 35.05, 29.70, 29.68, 29.63, 29.34, 22.60. HRMS (ESI):  $\text{C}_{18}\text{H}_{25}\text{FO}_2$ , calculated for  $[\text{M}-\text{H}]$ : 291.1766, found: 291.1777.

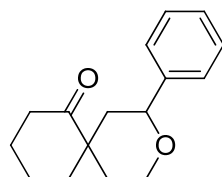

**2-phenyl-3-oxaspiro[5.5]undecan-7-one (8ca)**

Yield: 43%. Colorless oil.  $^1\text{H}$  NMR (300 MHz,  $\text{CDCl}_3$ ):  $\delta$  7.39 – 7.28 (m, 5H), 4.59 – 4.54 (dd,  $J$  = 1.8 Hz, 11.7 Hz, 1H), 4.07 – 4.02 (m, 1H), 3.79 – 3.75 (m, 1H), 2.55 – 1.38 (m, 12H);  $^{13}\text{C}$  NMR (75 MHz,  $\text{CDCl}_3$ ):  $\delta$  215.65, 142.83, 128.28, 127.37, 125.60, 76.28, 65.32, 48.27, 43.35, 42.60, 38.90, 34.47, 28.63, 20.20. HRMS (ESI):  $\text{C}_{16}\text{H}_{20}\text{O}_2$ , calculated for  $[\text{M}+\text{Na}]$ :  $\text{C}_{16}\text{H}_{20}\text{O}_2\text{Na}$ , 267.1356, found 267.1352.

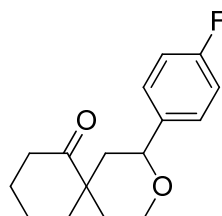

**2-(4-fluorophenyl)-3-oxaspiro[5.5]undecan-7-one (8cc)**

Yield: 49%. Colorless oil.  $^1\text{H}$  NMR (300 MHz,  $\text{CDCl}_3$ ):  $\delta$  7.39 – 7.02 (m, 4H), 4.61 – 4.57 (1H), 4.10 – 4.00 (1H), 3.80 – 3.65 (1H), 2.55 – 1.30 (m, 12H),  $^{13}\text{C}$  NMR (75 MHz,  $\text{CDCl}_3$ ):  $\delta$  215.53, 163.74, 160.33, 138.65, 127.42, 127.32, 115.18, 114.89, 75.63, 65.28, 48.23, 43.32, 42.58, 38.89, 34.45, 28.60, 20.21. HRMS (ESI):  $\text{C}_{16}\text{H}_{19}\text{FO}_2$ , calculated for  $[\text{M}+\text{Na}]$ :  $\text{C}_{16}\text{H}_{20}\text{FO}_2\text{Na}$ , 285.1261, found 285.1260.

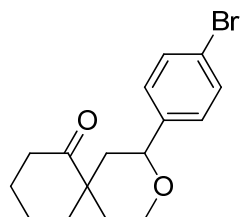

**2-(4-bromophenyl)-3-oxaspiro[5.5]undecan-7-one (8ce)**

Yield: 47%. White solid. Melting point: 117 °C.  $^1\text{H}$  NMR (300 MHz,  $\text{CDCl}_3$ ):  $\delta$  7.46 – 7.22 (m, 4H), 4.56 – 4.53 (dd,  $J$  = 1.2 Hz, 6.9 Hz, 1H), 4.00 – 3.65 (m, 2H), 2.52 – 1.25 (m, 12H);  $^{13}\text{C}$  NMR (75 MHz,  $\text{CDCl}_3$ ):  $\delta$  215.48, 141.98, 131.31, 127.40, 121.03, 75.58, 65.19, 48.17, 43.27, 42.53, 38.88, 34.42, 28.57, 20.19. HRMS (ESI)  $\text{C}_{16}\text{H}_{20}\text{BrO}_2$ , calculated for  $[\text{M}+\text{Na}]$ :  $\text{C}_{16}\text{H}_{20}\text{BrO}_2\text{Na}$ , 345.0461, found 345.0458.

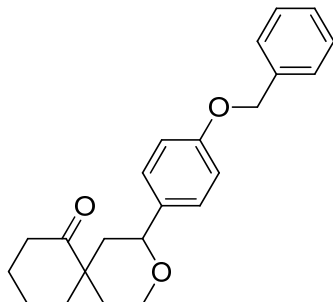

#### 2-(4-(benzyloxy)phenyl)-3-oxaspiro[5.5]undecan-7-one (8cr)

Yield: 39%. Colorless oil.  $^1\text{H}$  NMR (300 MHz,  $\text{CDCl}_3$ ):  $\delta$  7.48 – 6.97 (m, 9H), 5.10 (s, 2H), 4.50 – 4.49 (1H), 4.10 – 4.00 (m, 1H), 3.80 – 3.70 (m, 1H), 2.55 – 0.90 (m, 12H);  $^{13}\text{C}$  NMR (75 MHz,  $\text{CDCl}_3$ ):  $\delta$  215.66, 158.10, 136.99, 135.32, 128.47, 127.82, 127.36, 127.05, 114.66, 75.88, 69.94, 65.36, 48.31, 43.38, 42.44, 38.91, 34.48, 28.64, 20.21. HRMS (ESI)  $\text{C}_{23}\text{H}_{26}\text{O}_3$ , calculated for  $[\text{M}+\text{Na}]$ :  $\text{C}_{23}\text{H}_{26}\text{O}_3\text{Na}$ , 373.1774, found 373.1779.

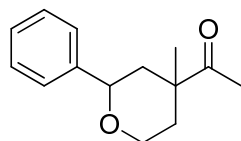

#### 1-(4-methyl-2-phenyltetrahydro-2H-pyran-4-yl)ethanone (8da)

Yield: 42%. Colorless oil.  $^1\text{H}$  NMR (300 MHz,  $\text{CDCl}_3$ ):  $\delta$  7.39 – 7.30 (m, 5H), 4.61 – 4.56 (dd,  $J$  = 3.6 Hz, 10.2 Hz, 1H), 4.17 – 4.12 (m, 1H), 3.91 – 3.82 (m, 1H), 2.19 (s, 3H), 2.08 – 1.59 (m, 4H), 1.58 (s, 3H);  $^{13}\text{C}$  NMR (75 MHz,  $\text{CDCl}_3$ ):  $\delta$  212.33, 142.35, 128.34, 127.55, 125.77, 74.94, 63.74, 45.79, 40.63, 32.10, 24.20, 19.23.

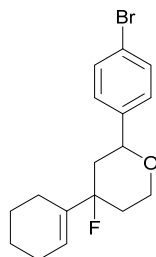

#### 2-(4-bromophenyl)-4-(cyclohex-1-en-1-yl)tetrahydro-2H-pyran (9)

Yield: 95%. White solid.  $^1\text{H}$  NMR (300 MHz,  $\text{CDCl}_3$ ):  $\delta$  7.40 – 7.37 (m, 2H), 7.18 – 7.14 (m, 2H), 5.71 – 5.68 (m, 1H), 4.61 (dd,  $J$  = 11.5 Hz, 2.3 Hz, 1H), 4.02 – 3.85 (m, 2H), 2.01 – 1.46 (m, 12H),  $^{13}\text{C}$  NMR (75 MHz,  $\text{CDCl}_3$ ): 141.41, 139.04, 138.78, 131.38, 127.40, 122.21, 122.08, 121.15, 95.59, 93.33, 74.46, 63.87, 42.20, 41.90, 33.81, 33.51, 24.84, 23.40, 23.34, 22.53, 21.99.

### 3. $^1\text{H}$ and $^{13}\text{C}$ NMR spectra

Compound 3

5.7257  
5.7228  
5.5555  
5.5523

3.8445  
3.8326  
3.8207

2.6982  
2.6863  
2.6745

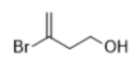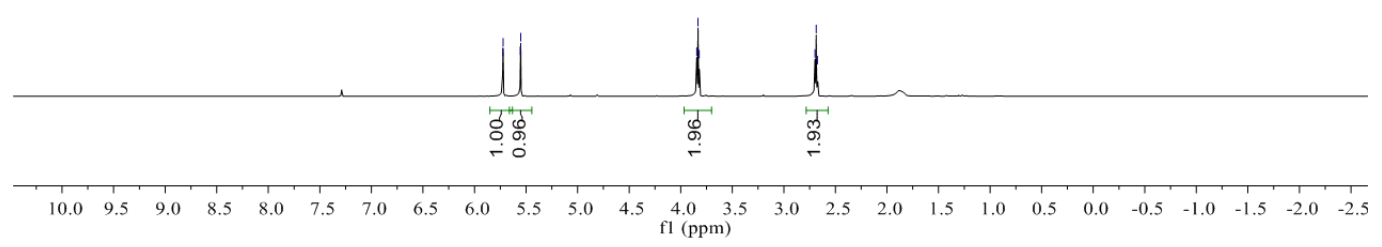

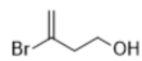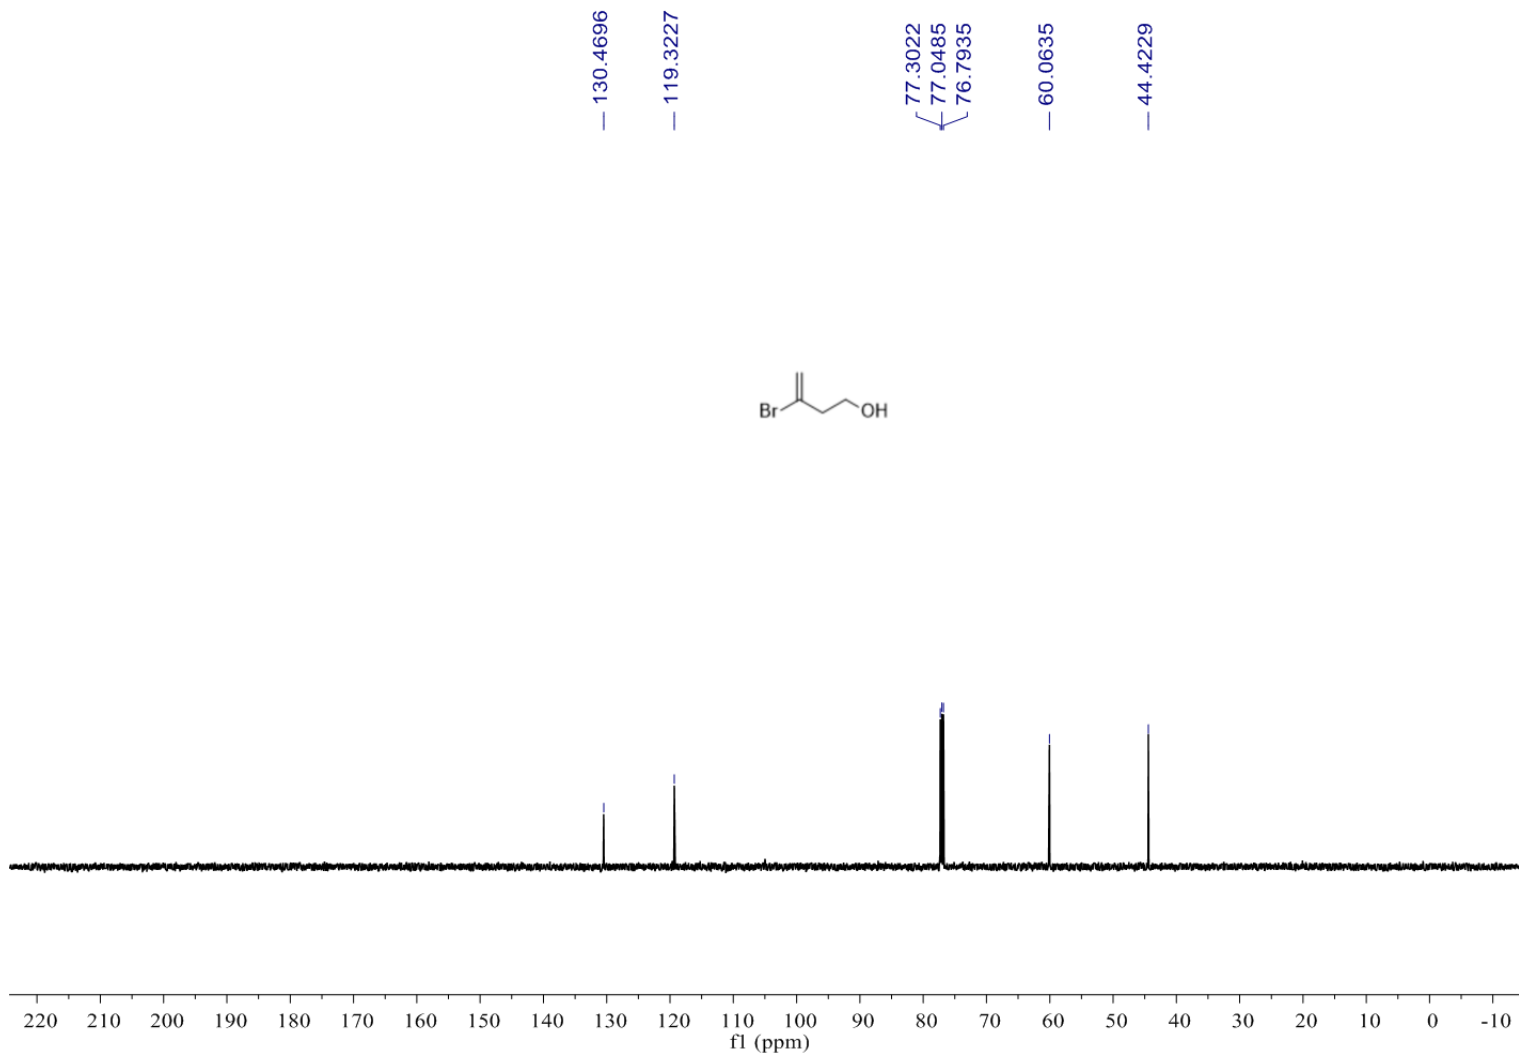

Compound 4

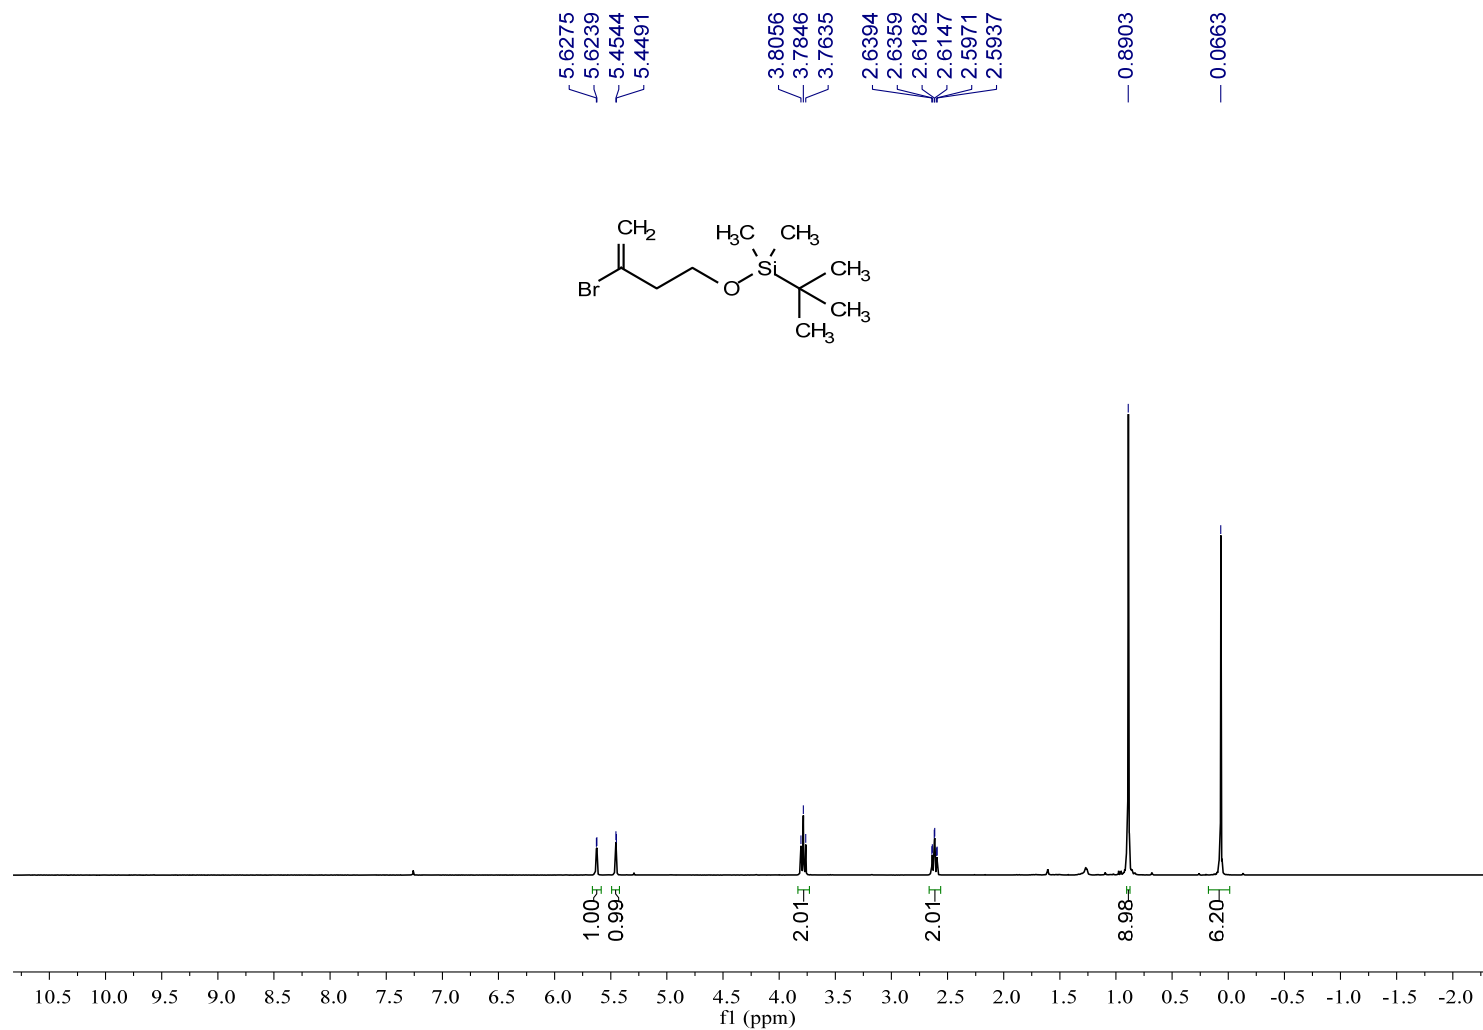

— 130.8261

— 118.3821

— 60.8375

— 44.7833

— 25.8729

— 18.2862

— -5.3317

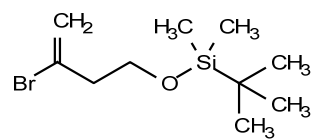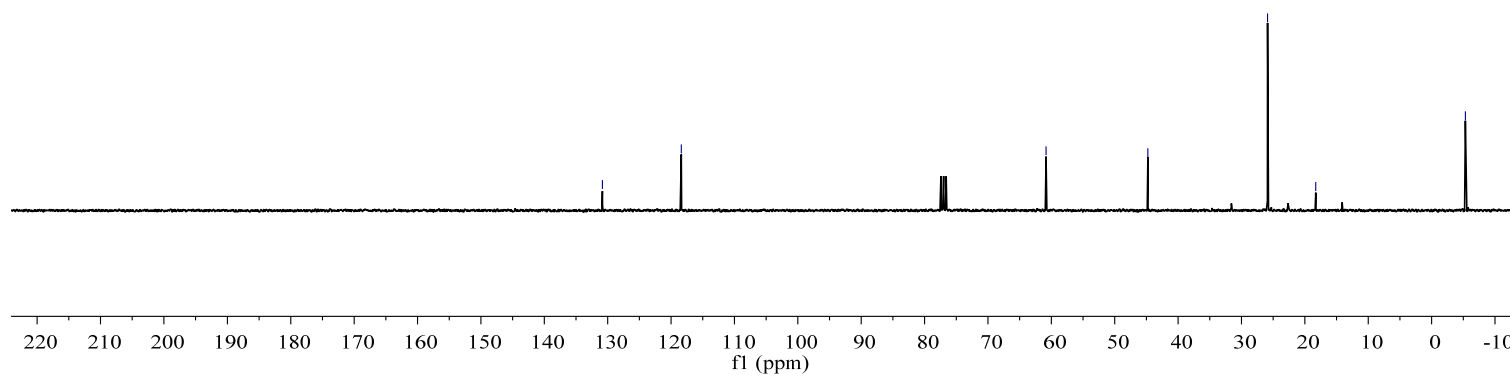

Compound 1a

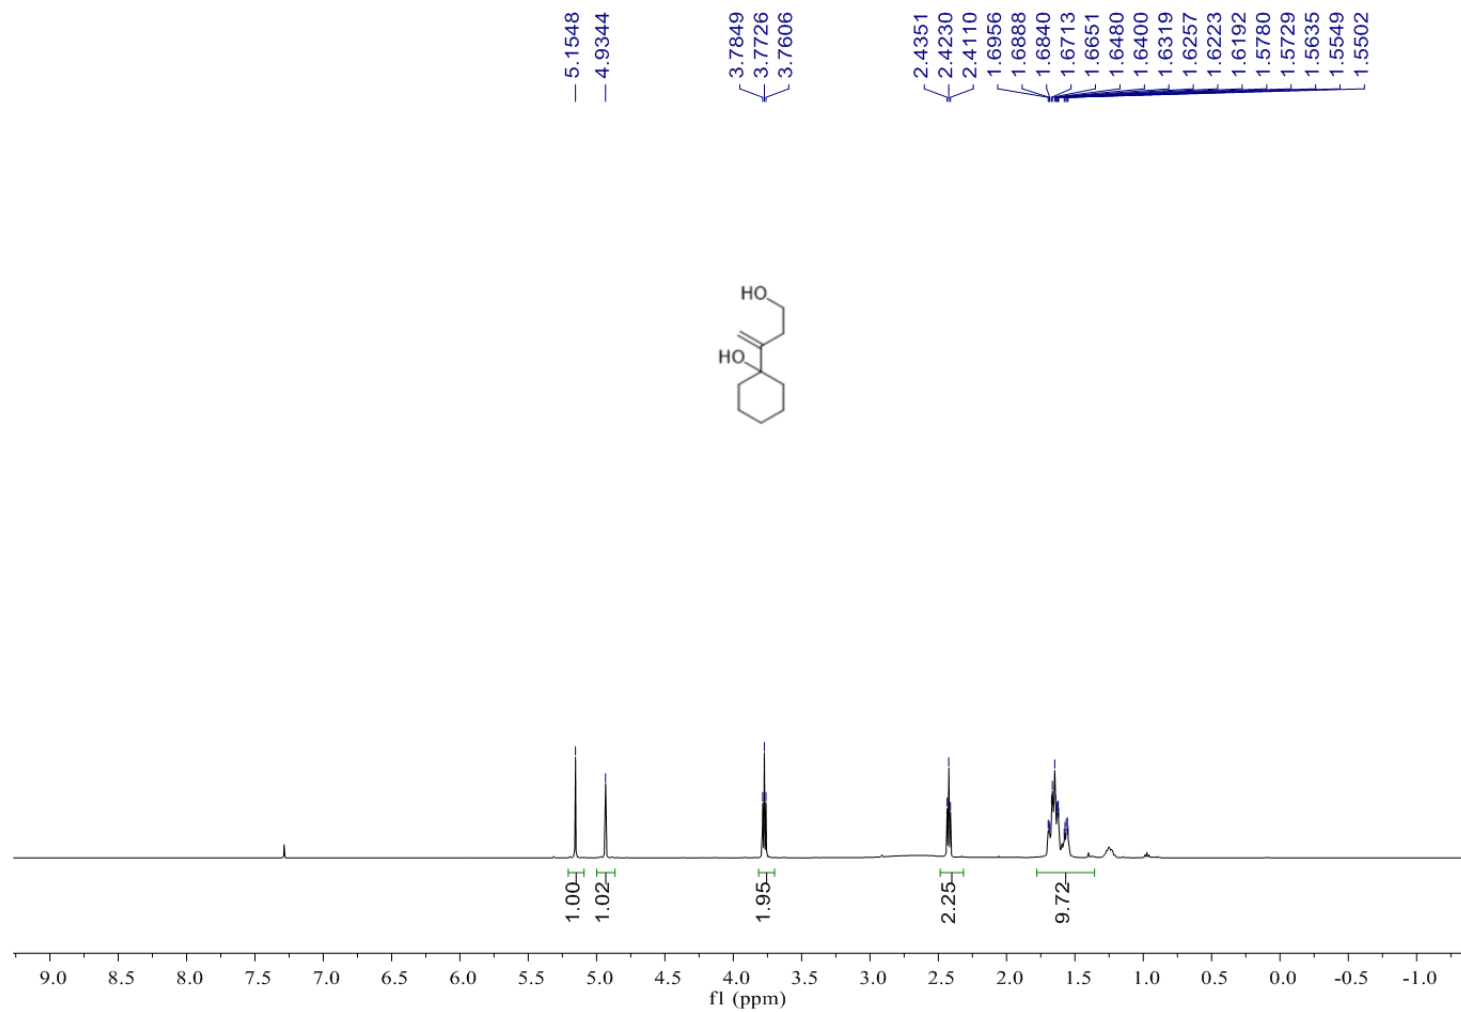



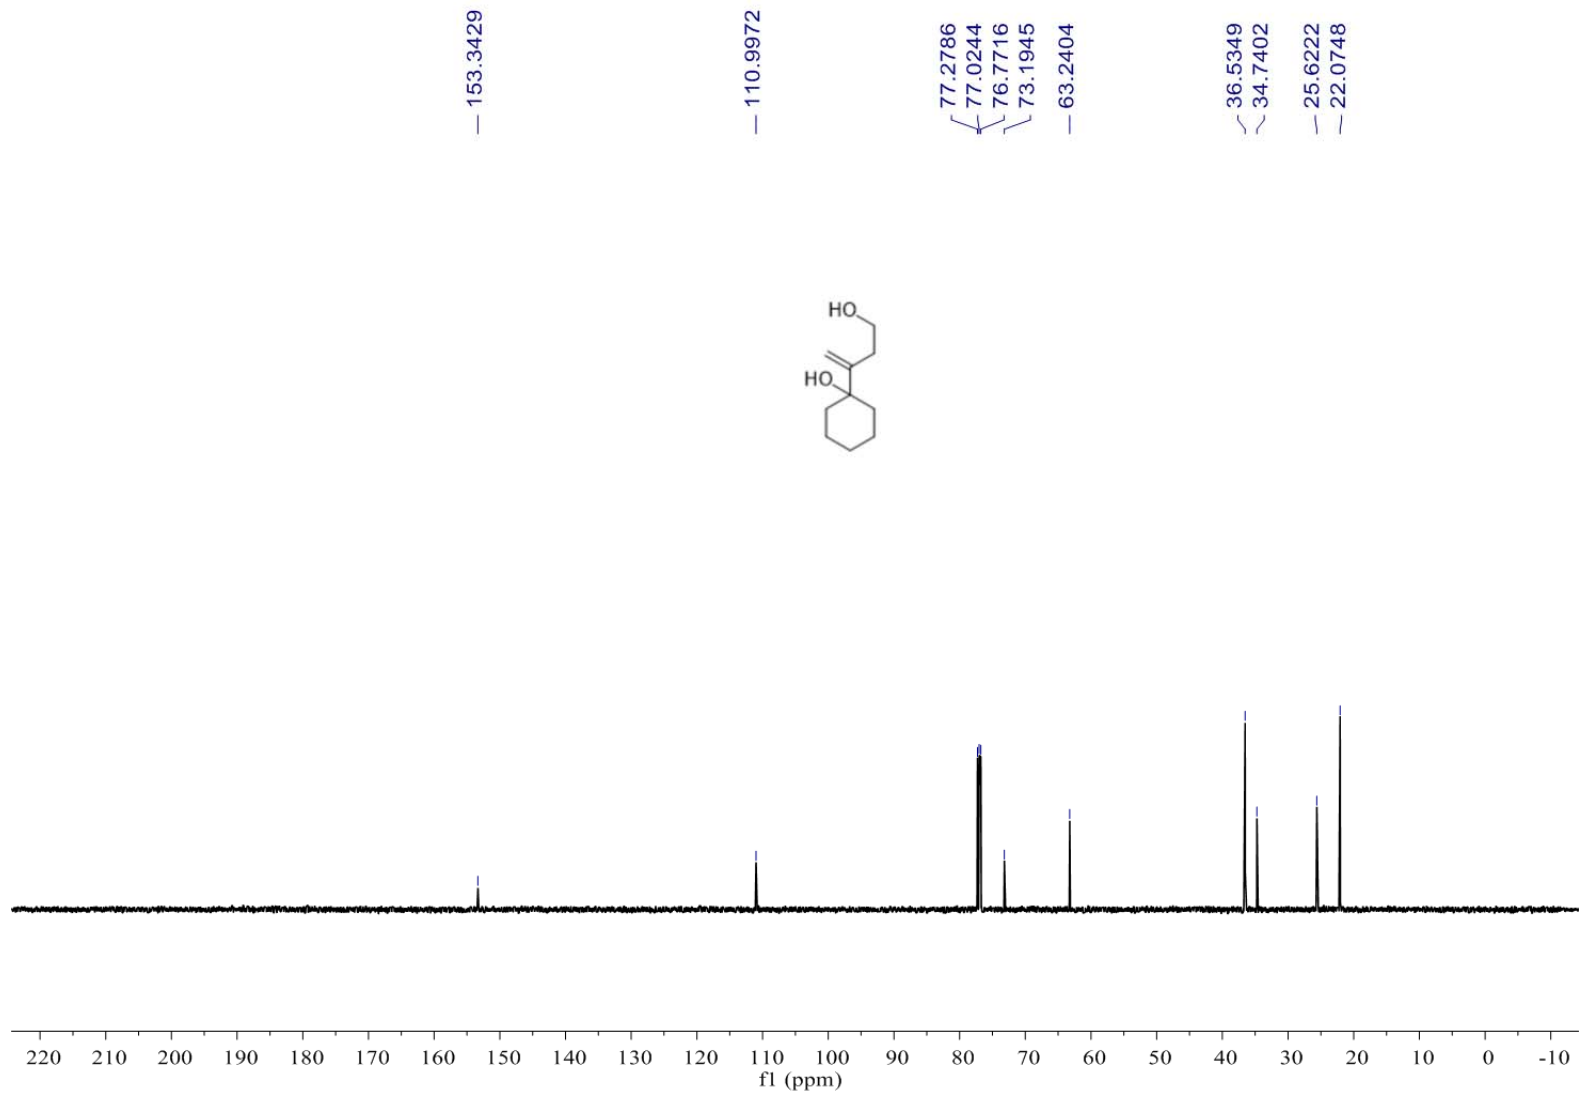

Compound **1b**

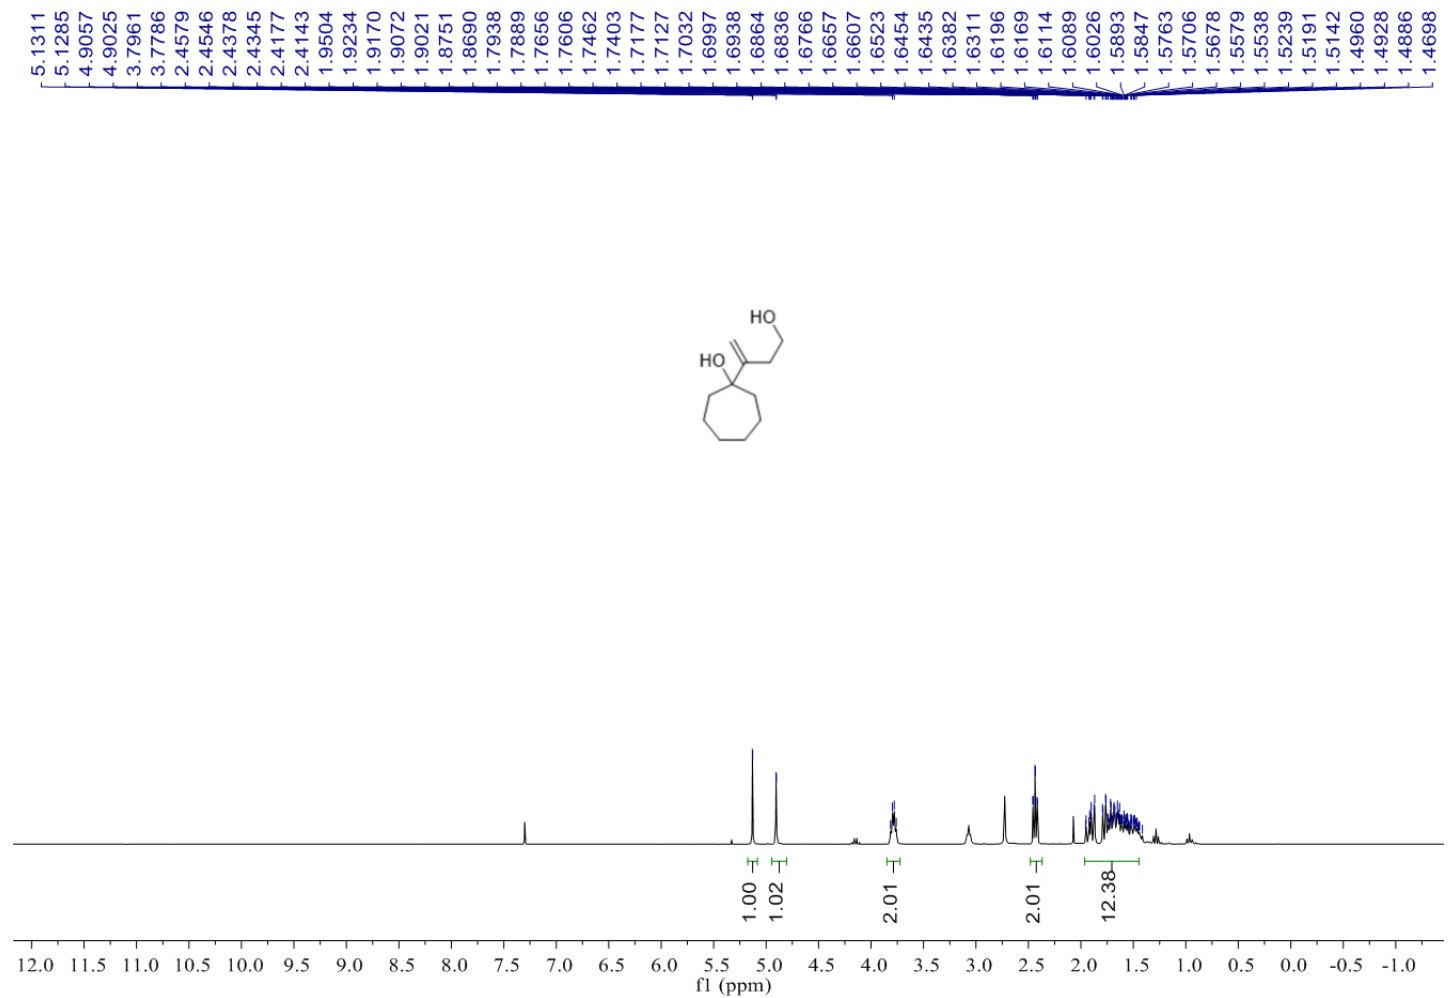

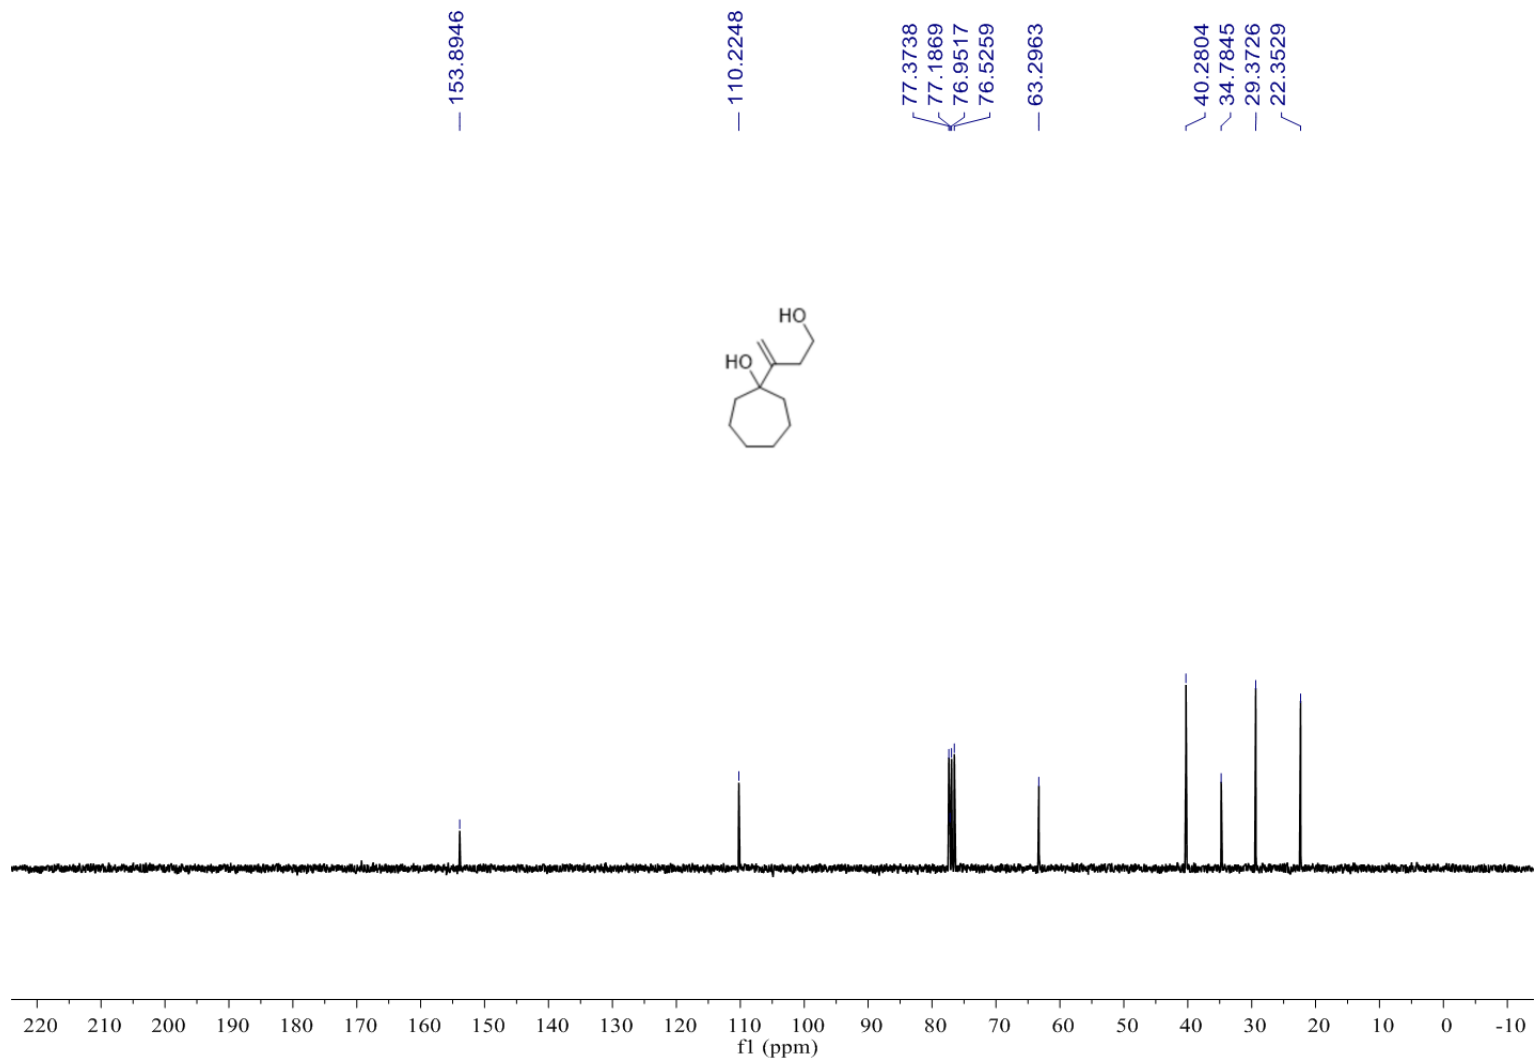

Compound 1c

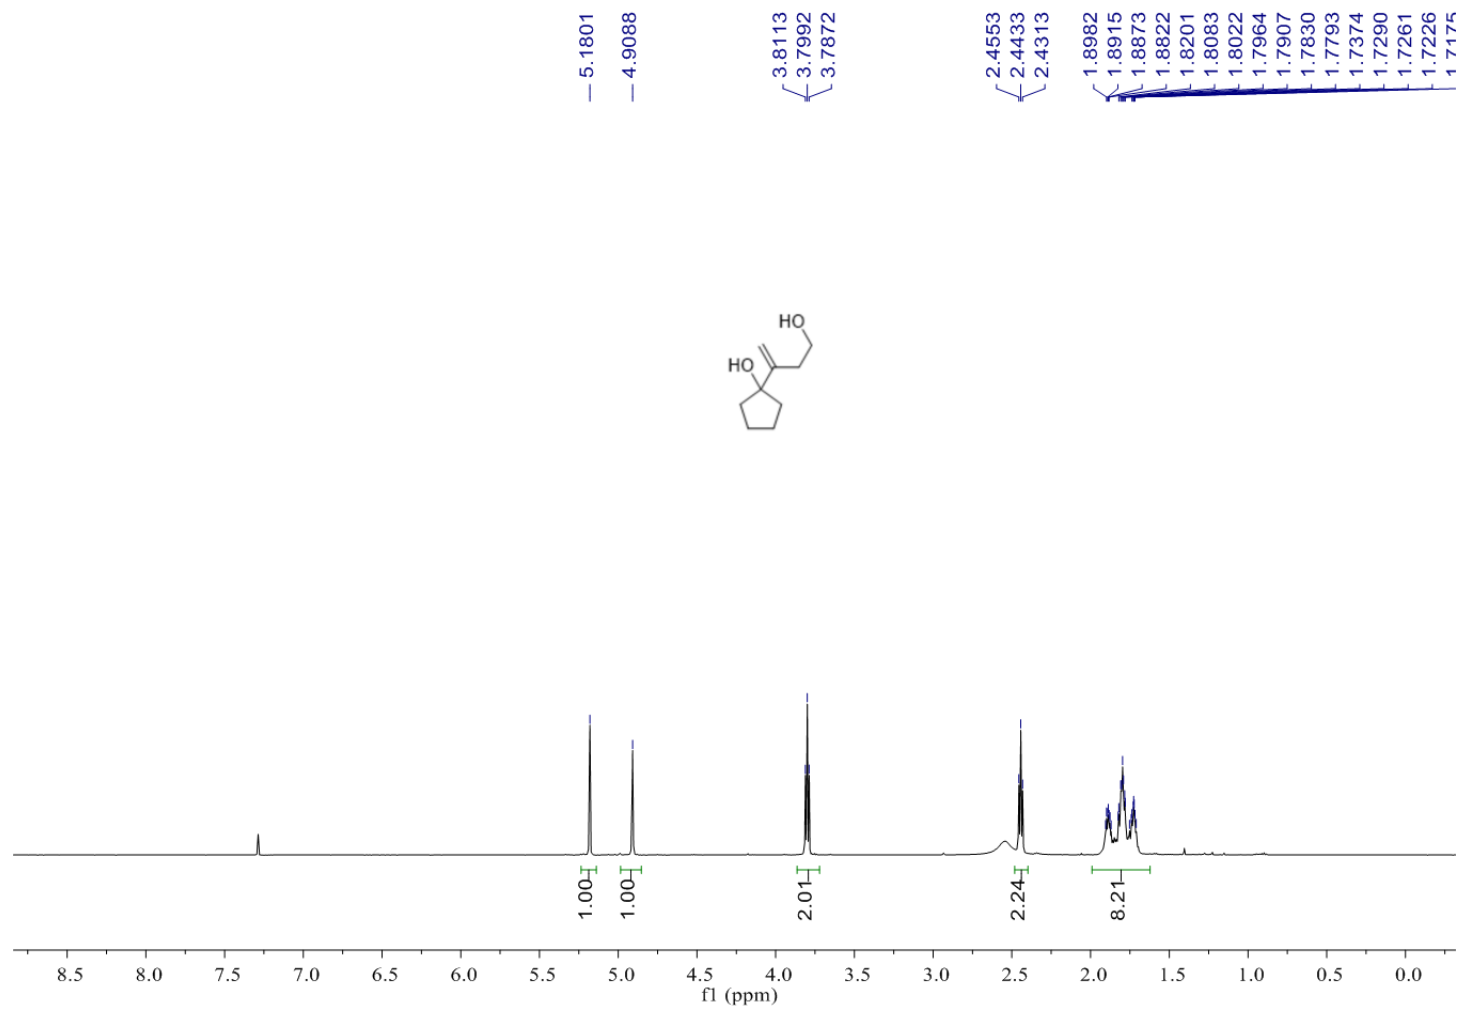

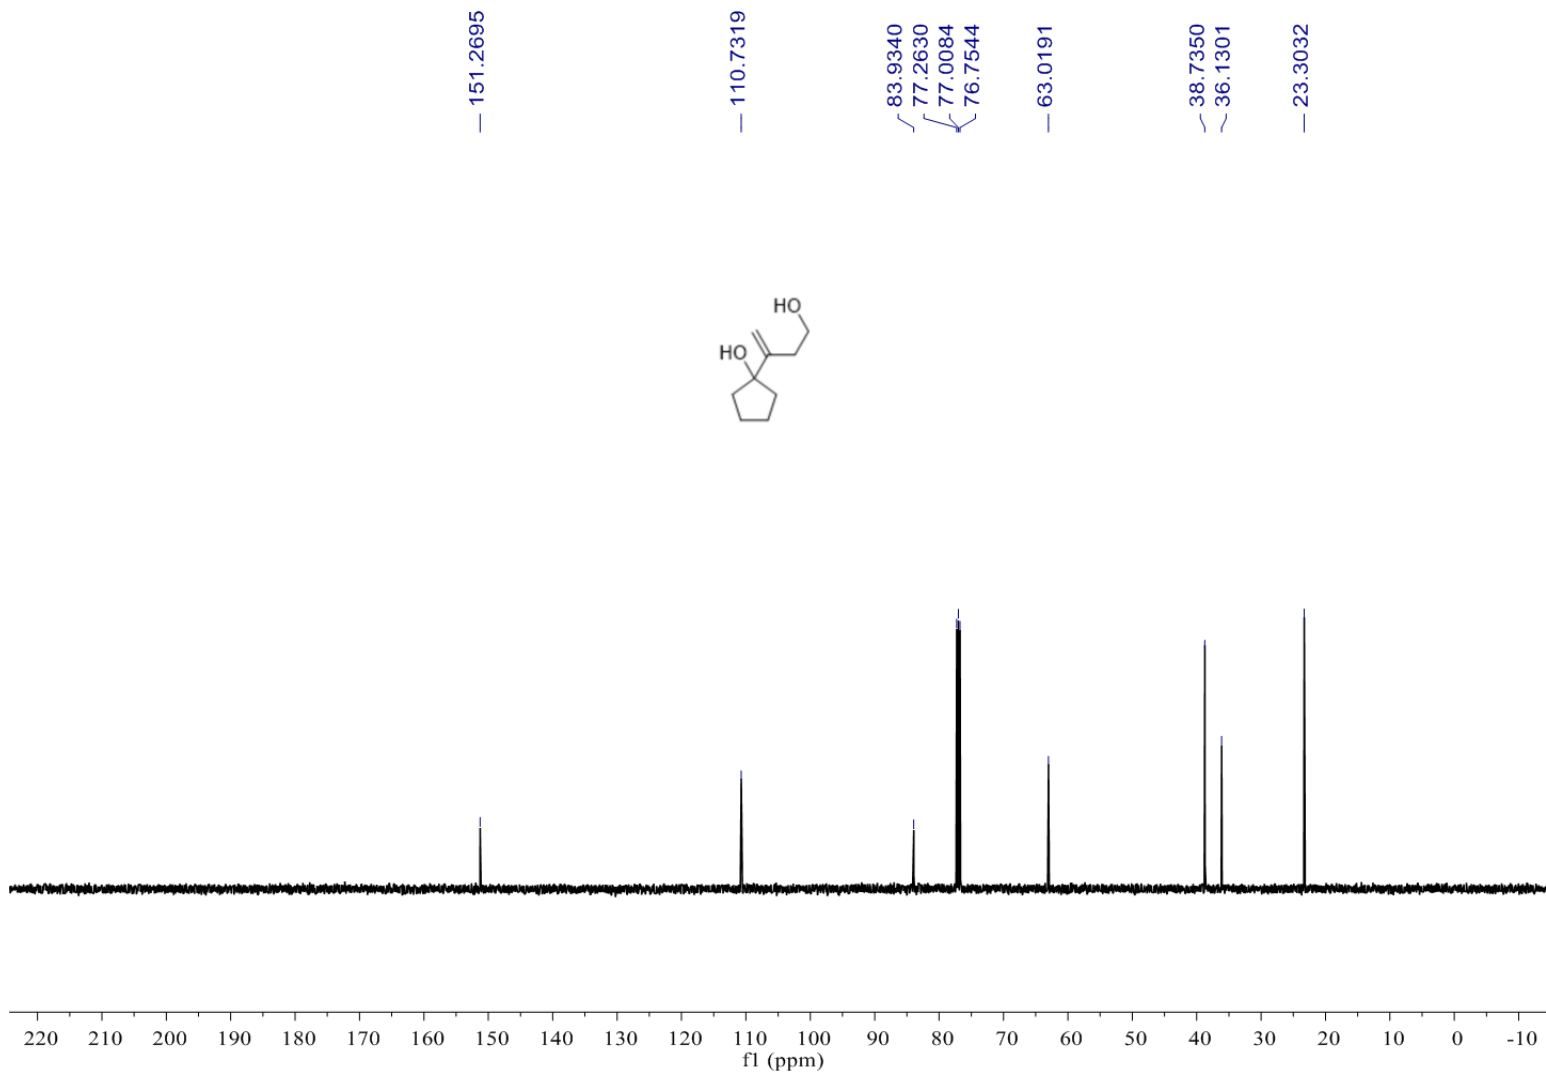

Compound 7aa

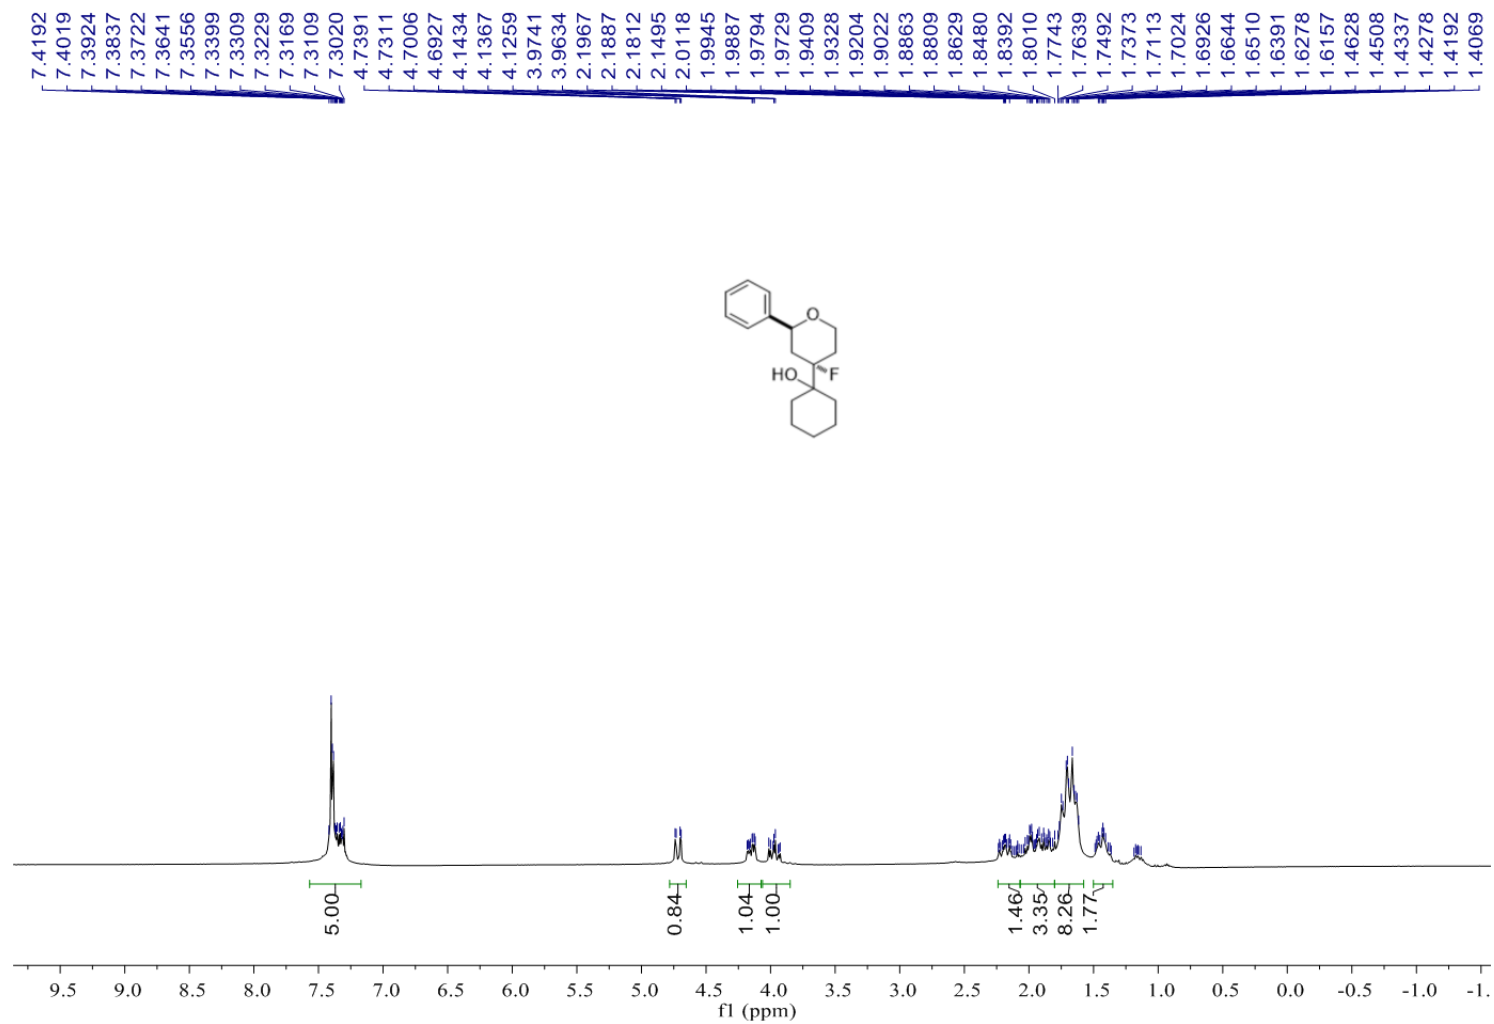

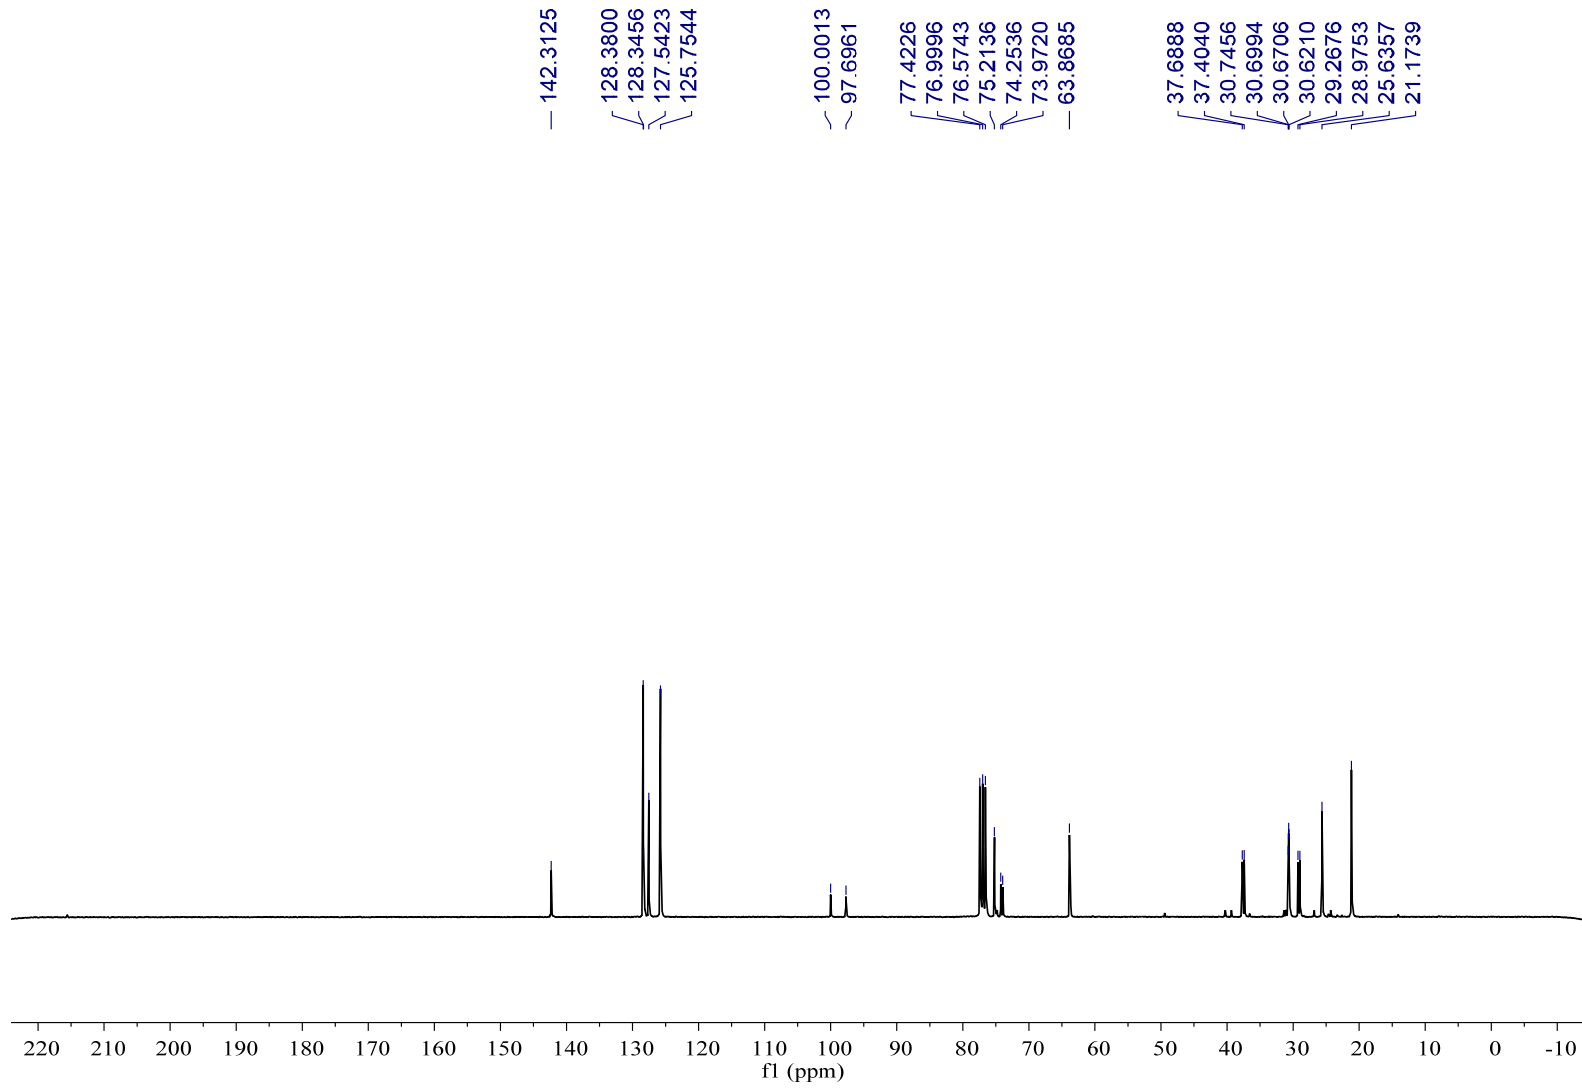

Compound **7ab**

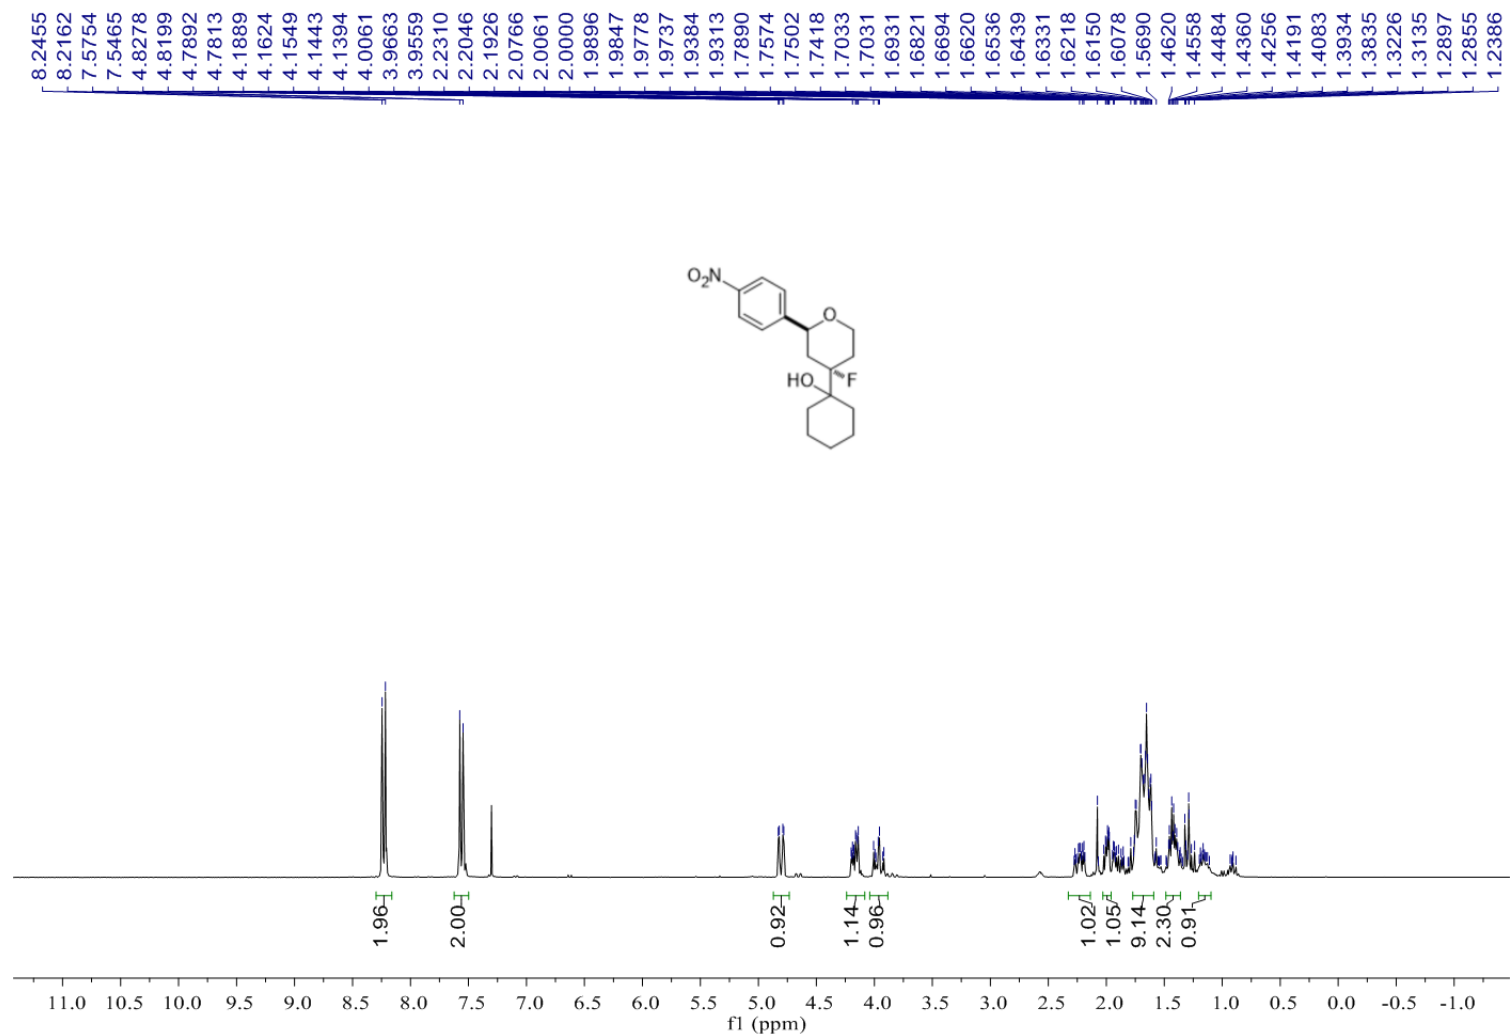



149.7789  
147.1296

126.4880  
126.3249  
123.5617  
123.5264

99.5275  
97.2133

77.3766  
76.9539  
76.5302  
74.1808  
74.1399  
73.8558  
63.7655

37.5826  
37.2976  
30.6231  
30.5789  
29.1256  
28.8345  
25.5043  
21.0725

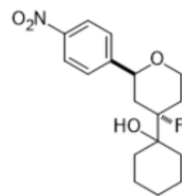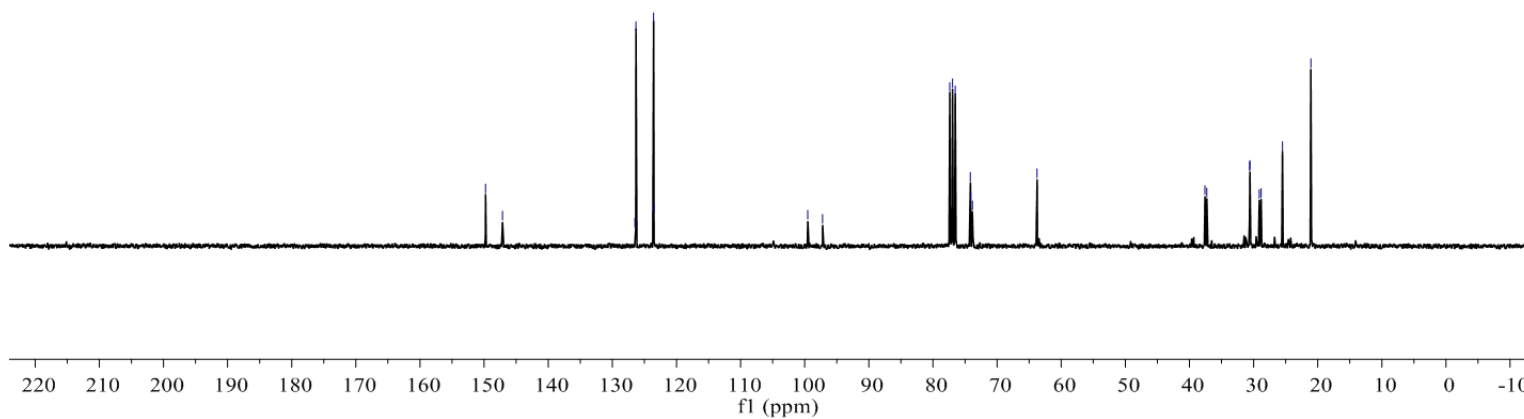

Compound **7ac**

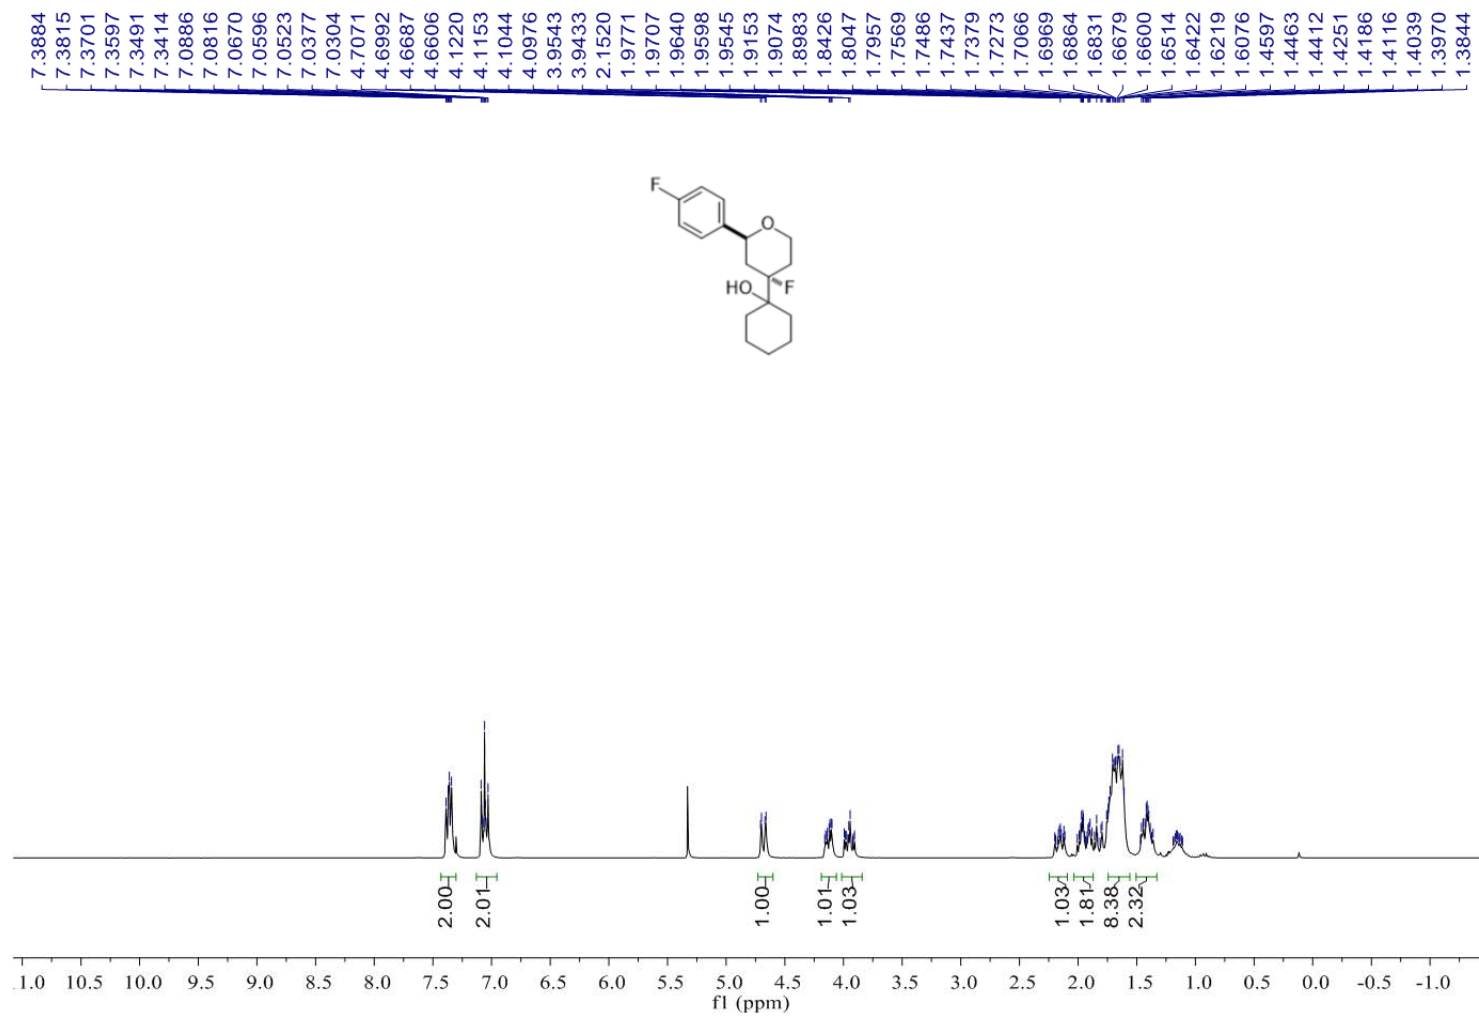

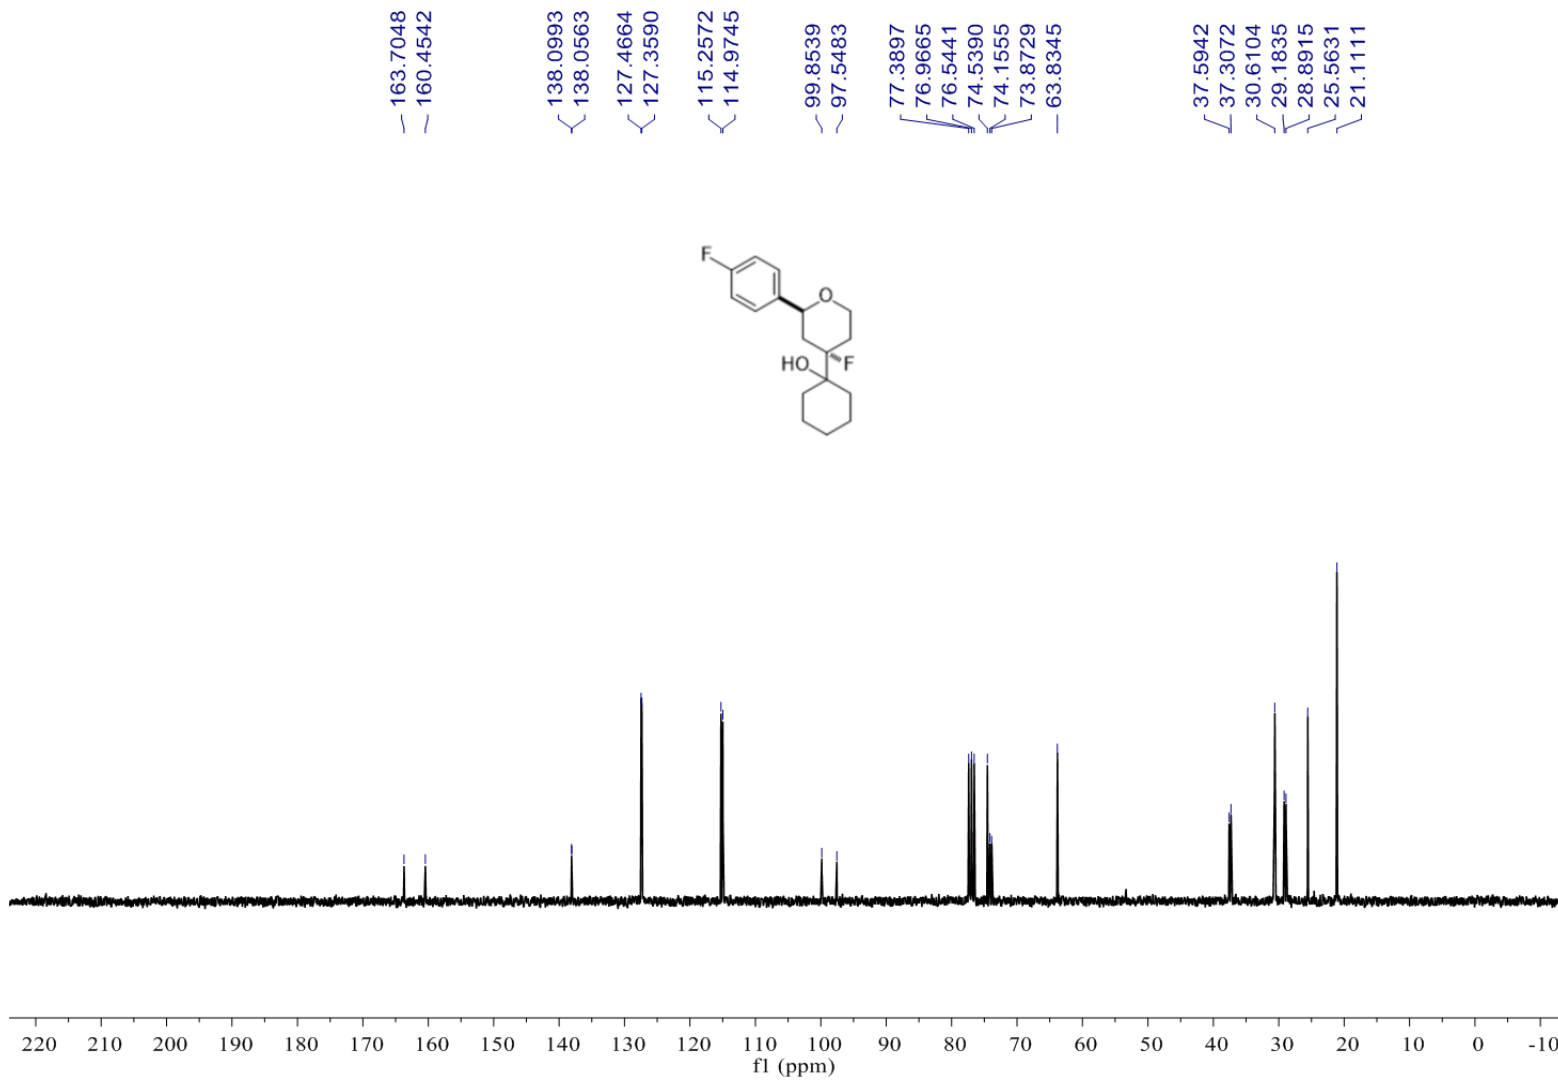

Compound 7ad

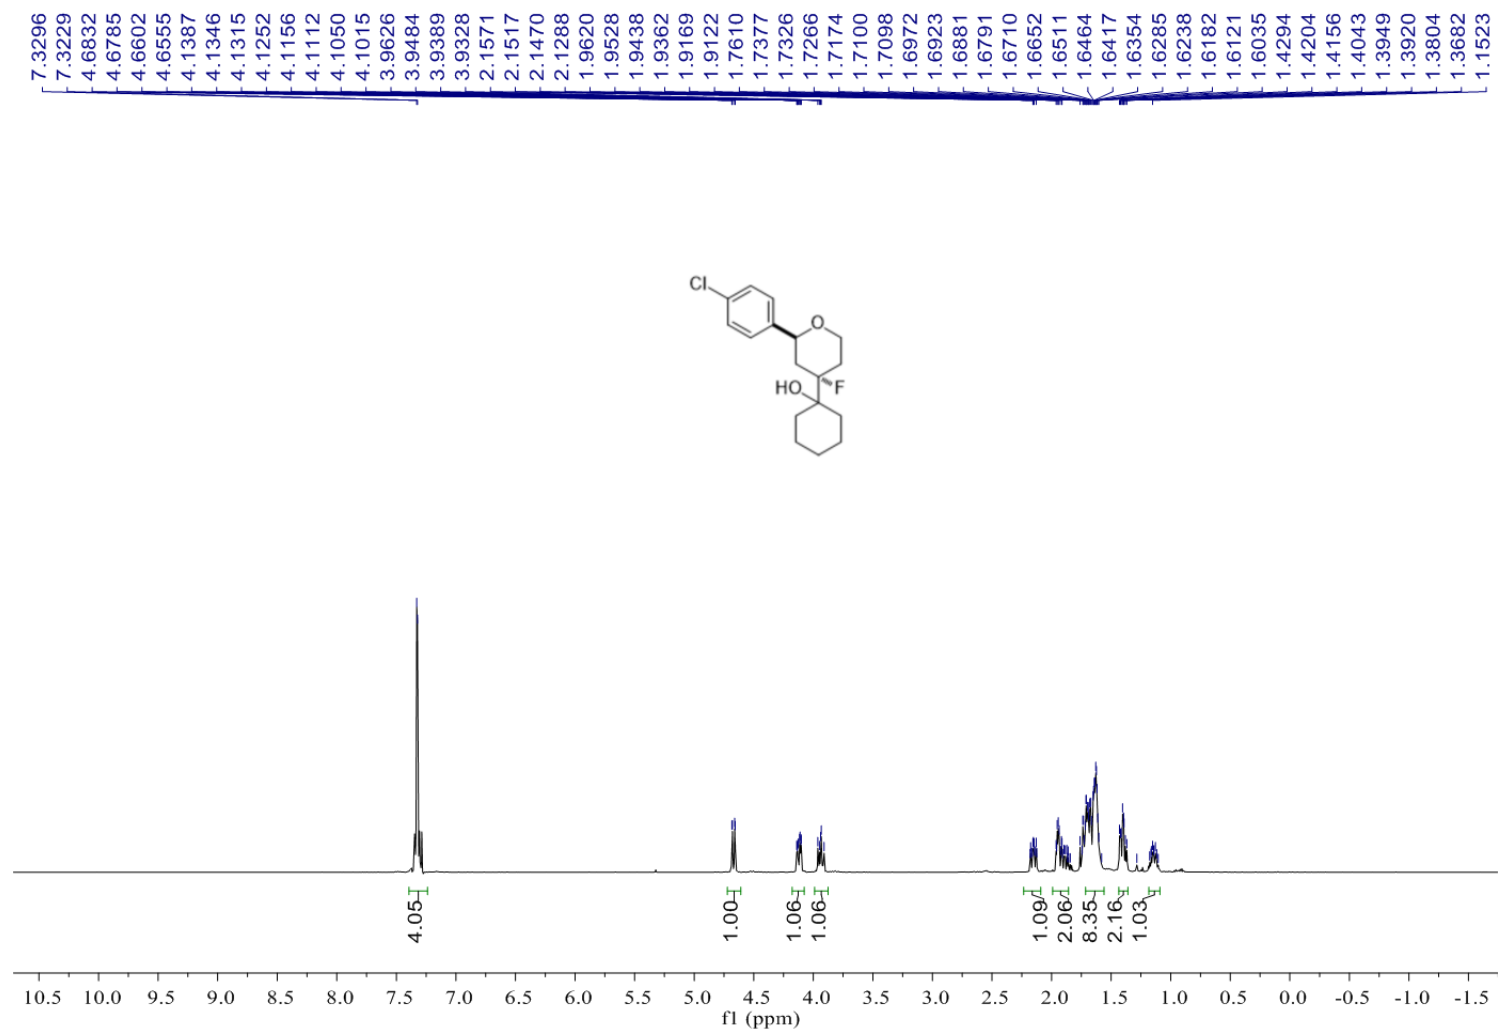

140.9490  
133.1961  
128.5312  
127.1541

99.4051  
98.0187

77.2713  
77.0186  
76.7641  
74.5385  
74.1852  
74.0149  
63.8922

37.6159  
37.4444  
30.7605  
30.7283  
30.6953  
29.2224  
29.0469  
25.6493  
21.2041

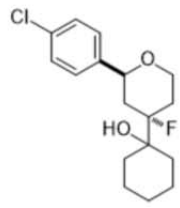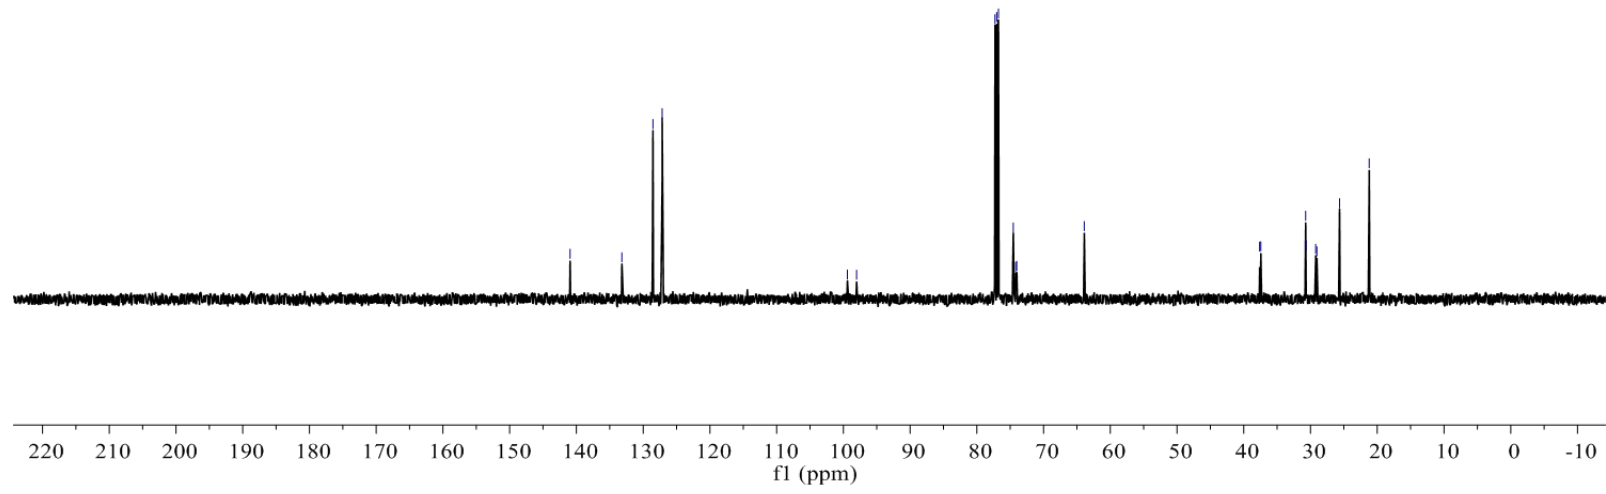

Compound 7ae

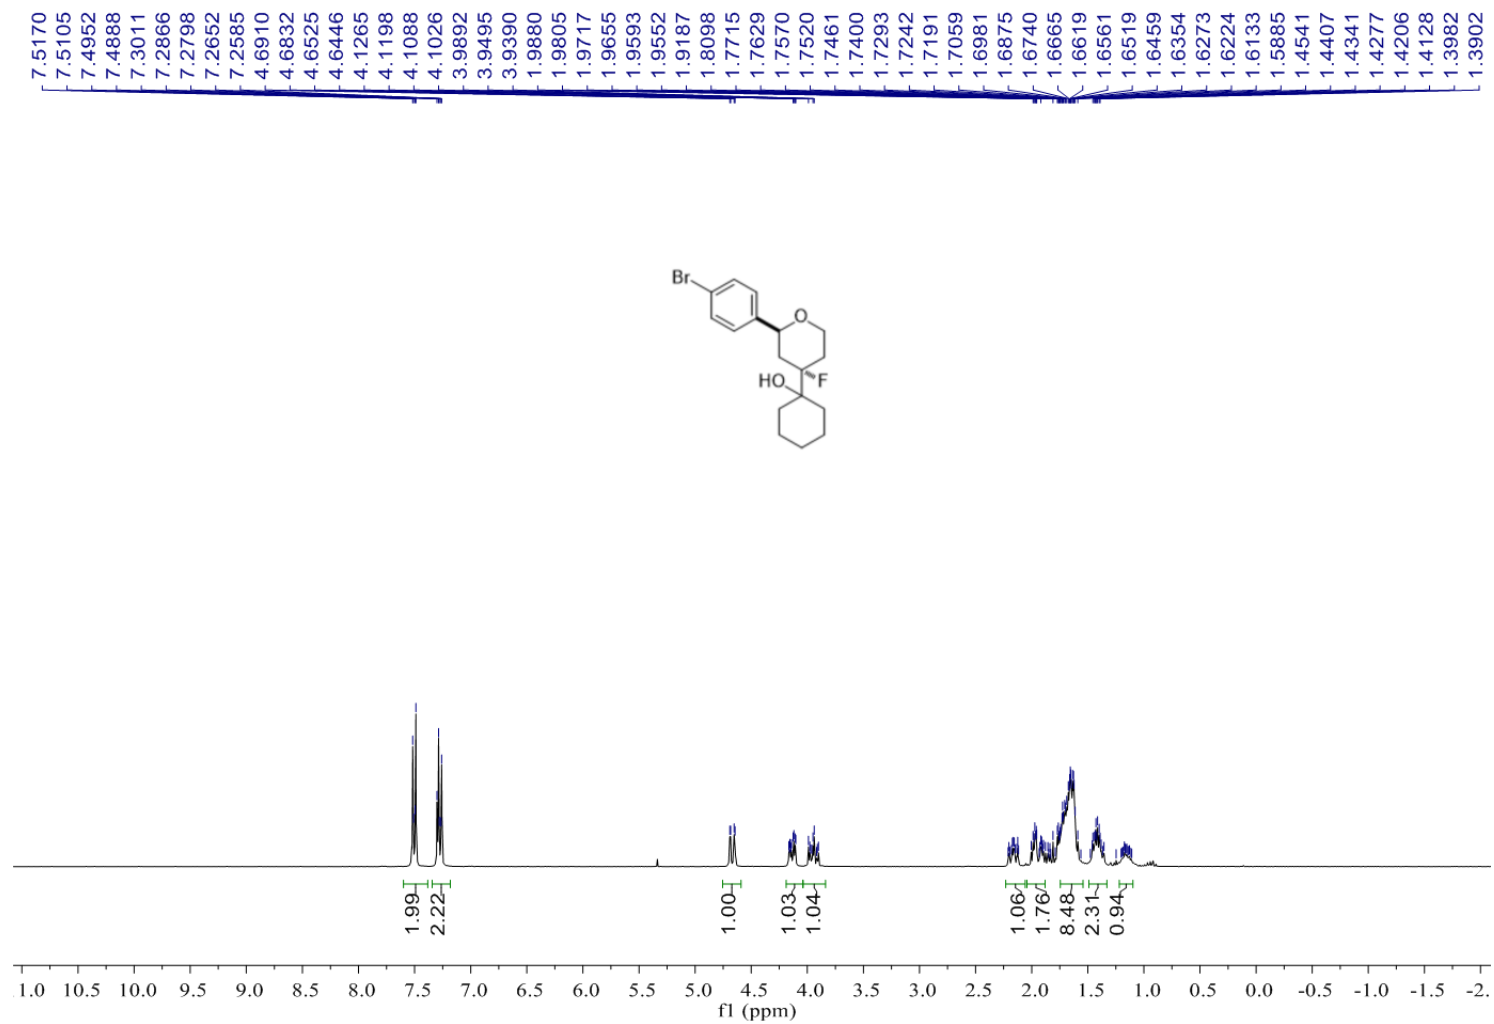

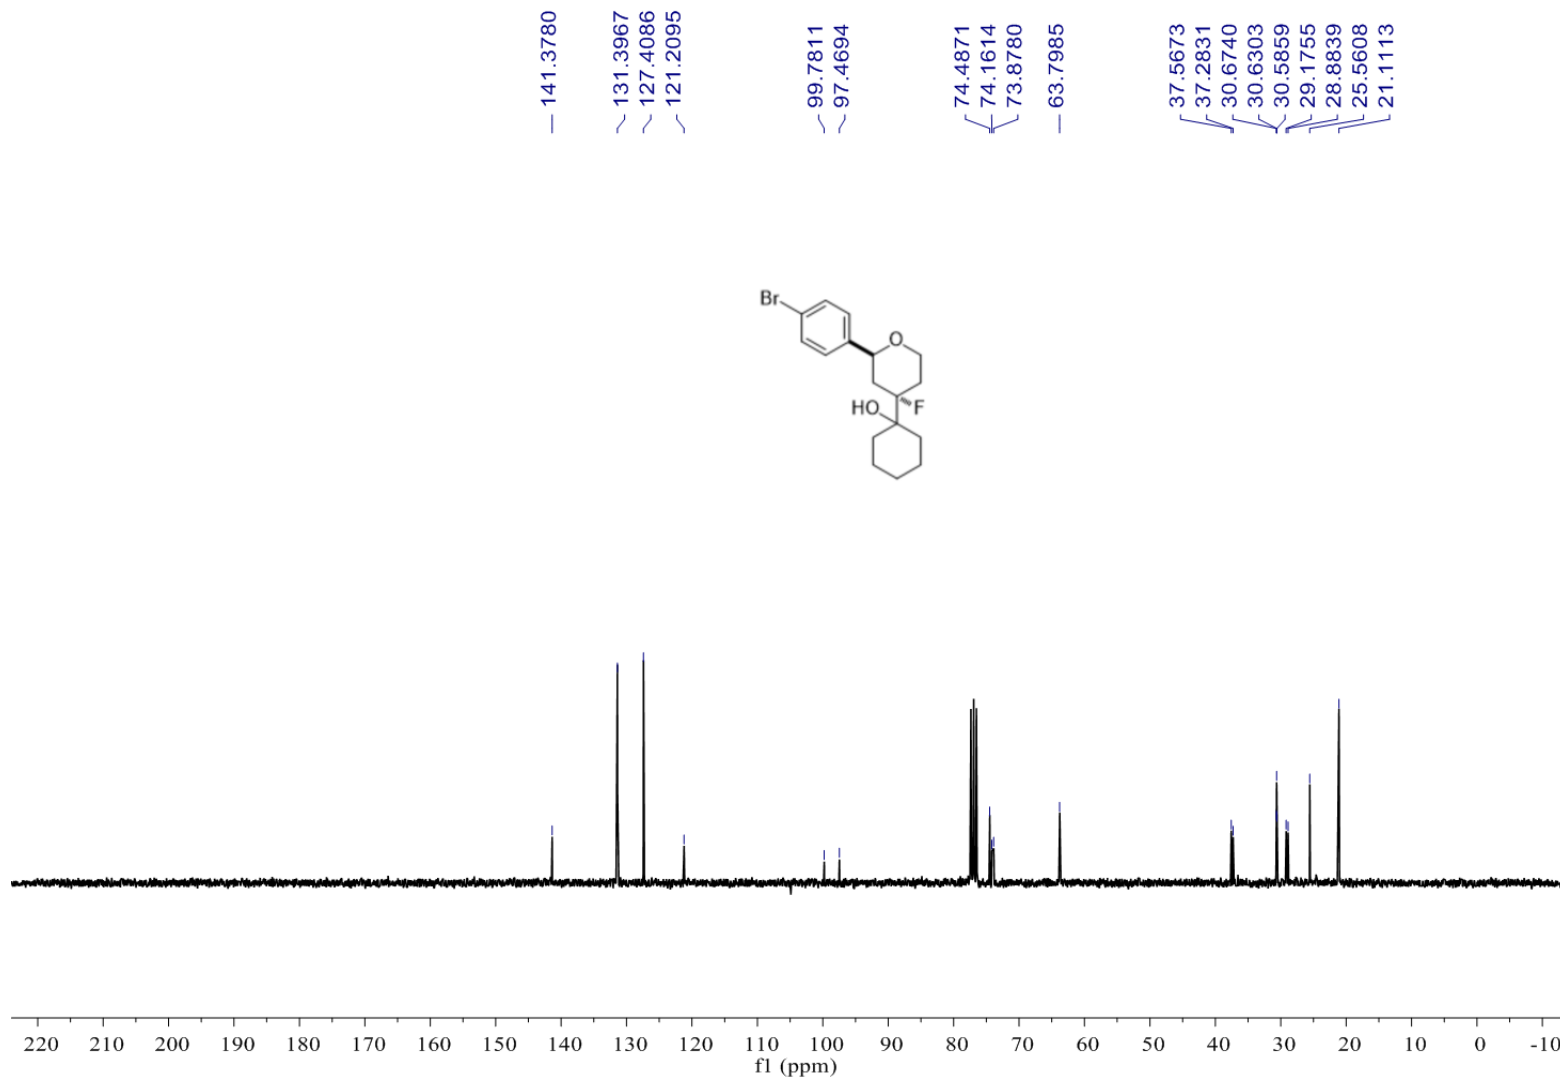

Compound **7af**

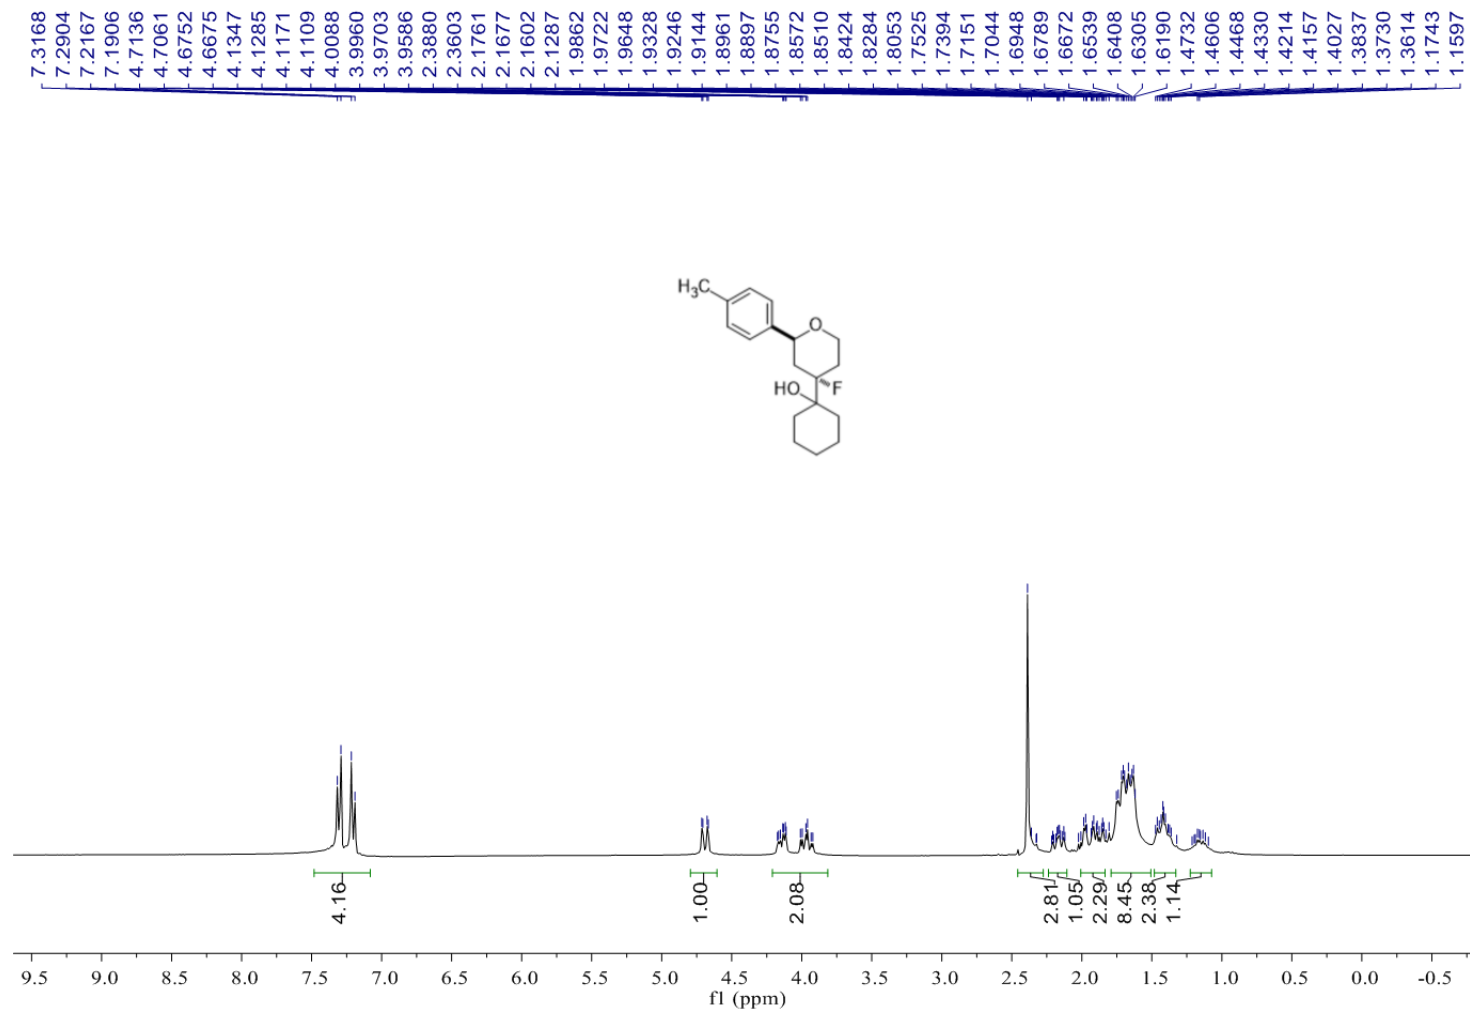



139.3192  
137.1317  
129.0017  
125.6994

100.0246  
97.7187

77.4469  
77.0231  
76.5986  
75.0527  
74.1997  
73.9200  
63.8351

37.6339  
37.3488  
30.7097  
30.6618  
30.6154  
30.5651  
29.2236  
28.9297  
25.6326  
21.1753  
21.1506  
21.0632

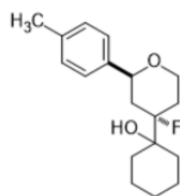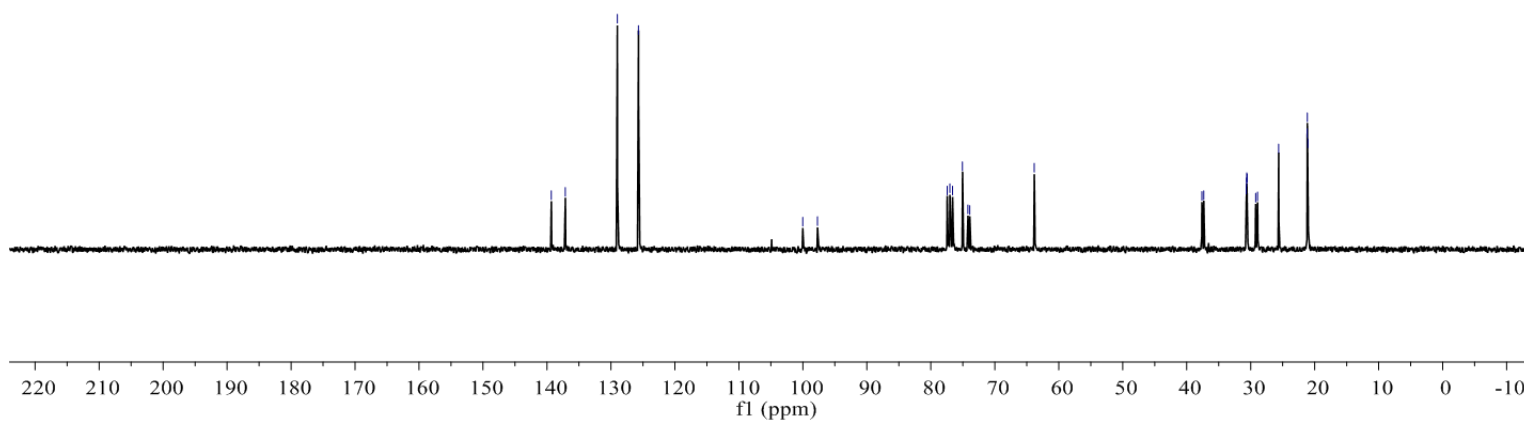

Compound 7ag

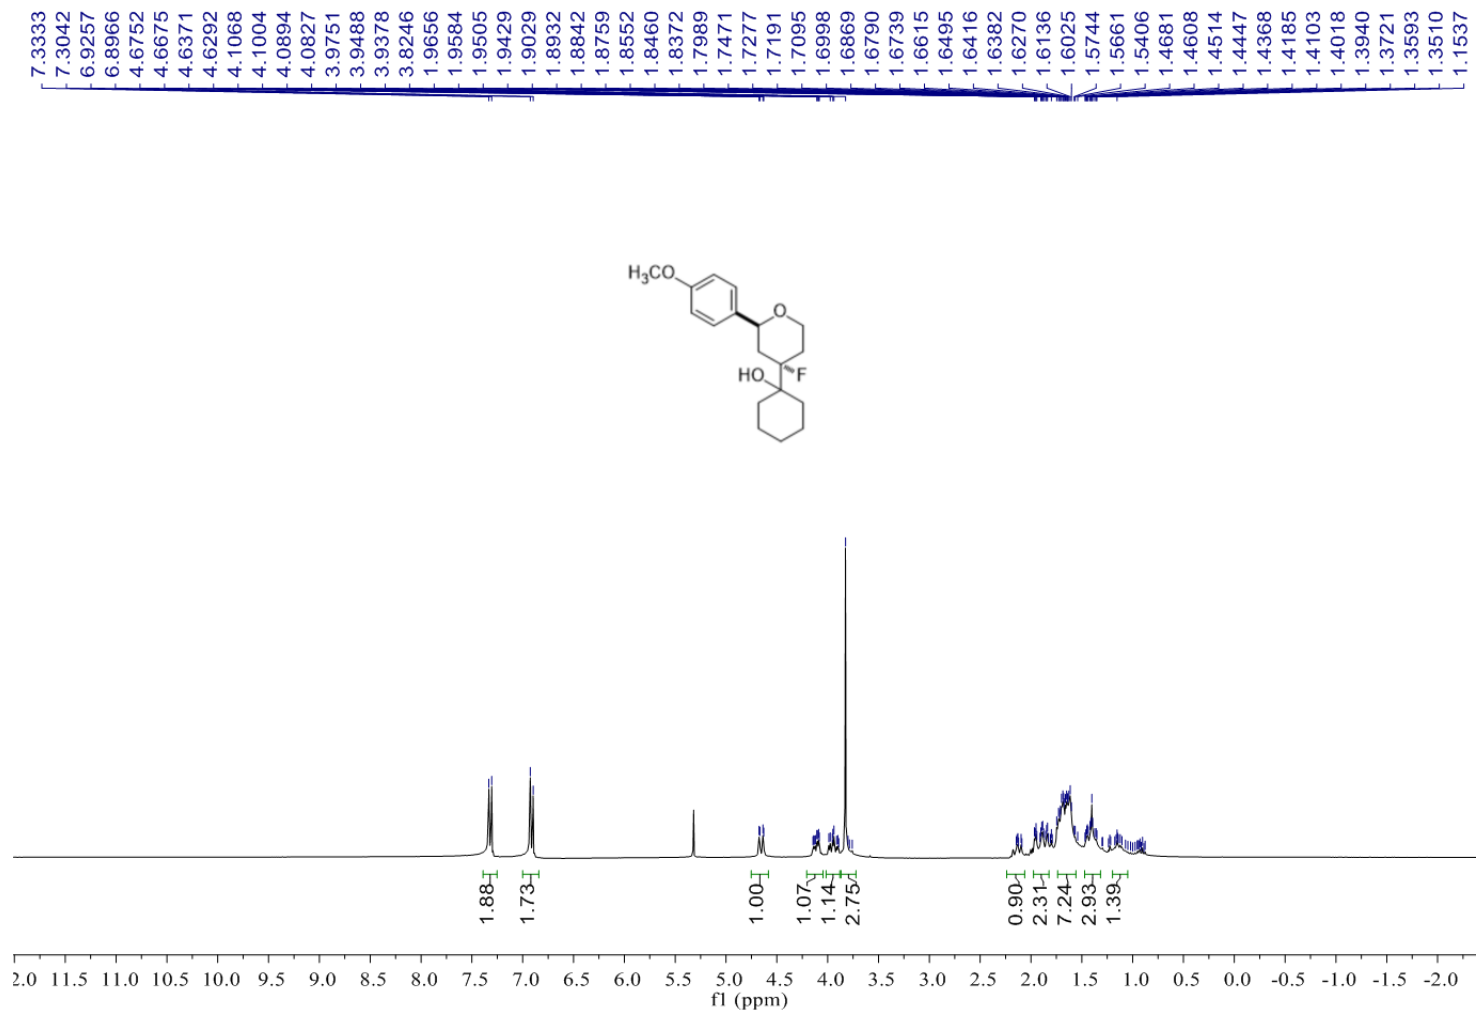

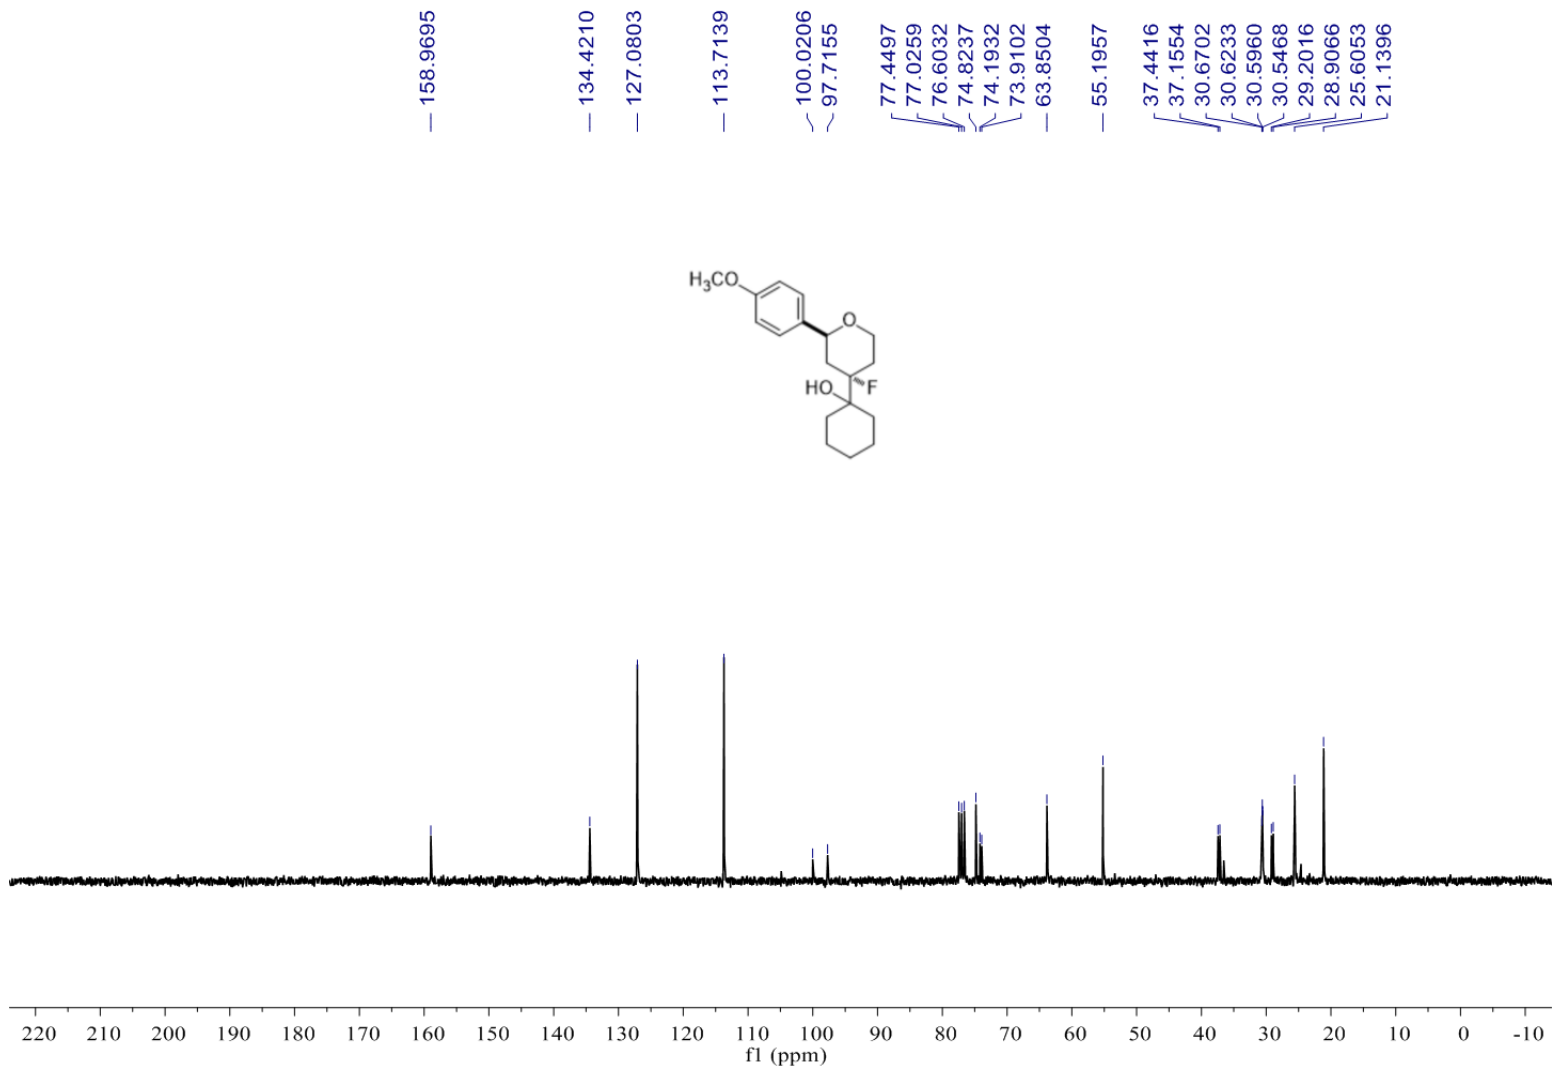

Compound 7ah

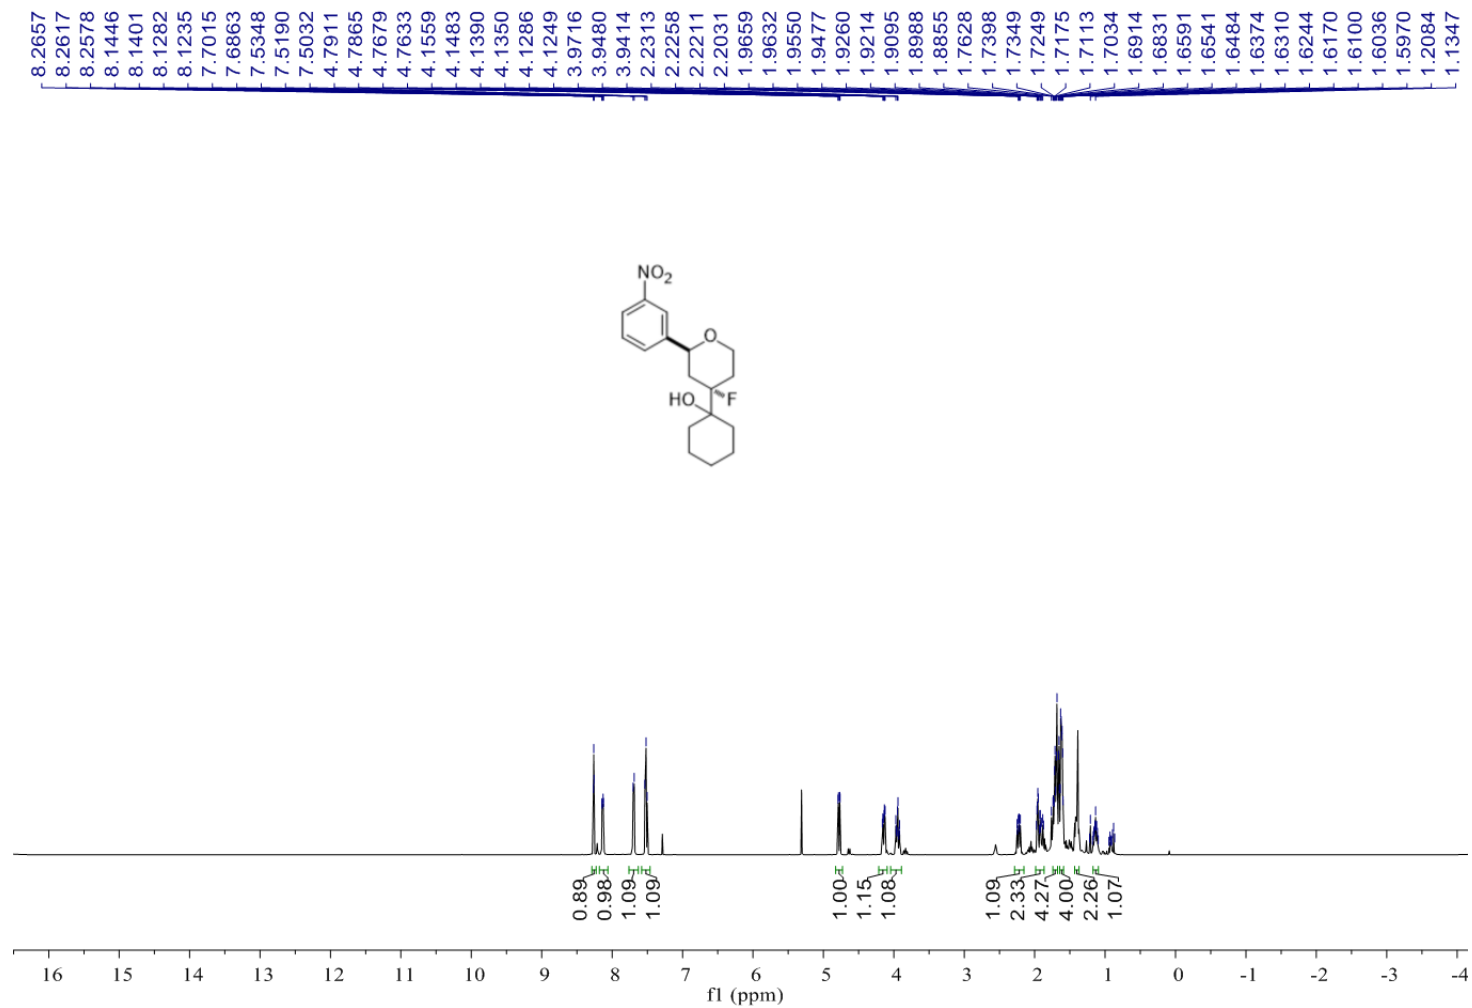

— 148.3559  
— 144.6737

— 131.8703  
— 129.2943  
— 122.4258  
— 120.8154

— 99.1787  
— 97.7898

— 77.3139  
— 77.0594  
— 76.8048  
— 74.1581  
— 74.1001  
— 73.9881  
— 63.8816

— 37.5253  
— 37.3541  
— 30.7095  
— 30.6850  
— 30.6601  
— 29.1564  
— 28.9818  
— 25.5982  
— 21.1603

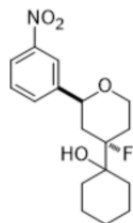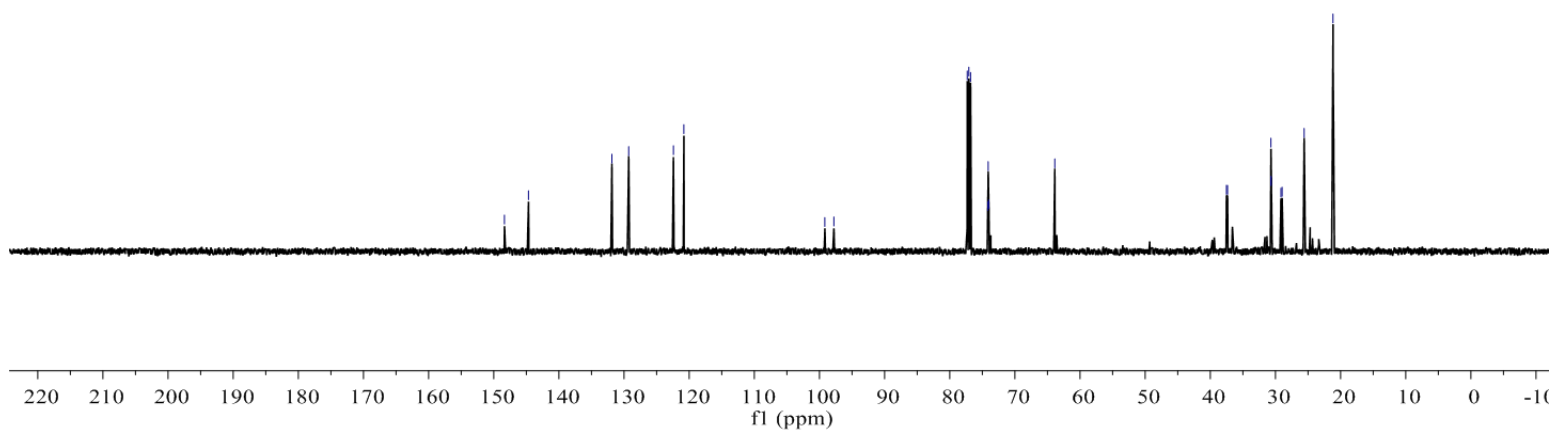

Compound 7ai

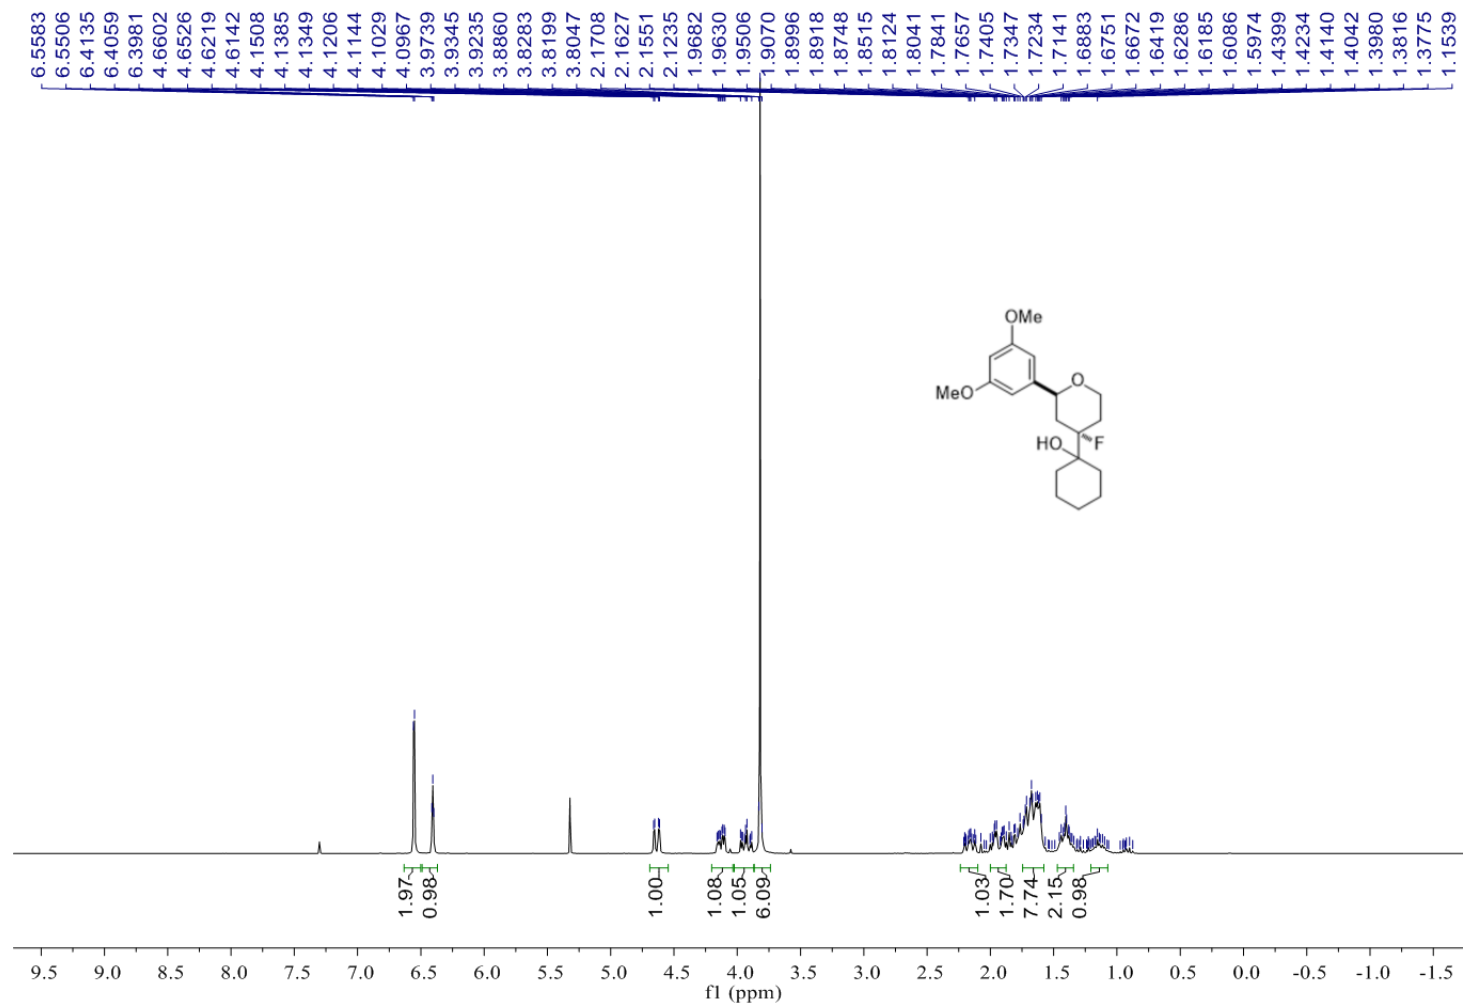

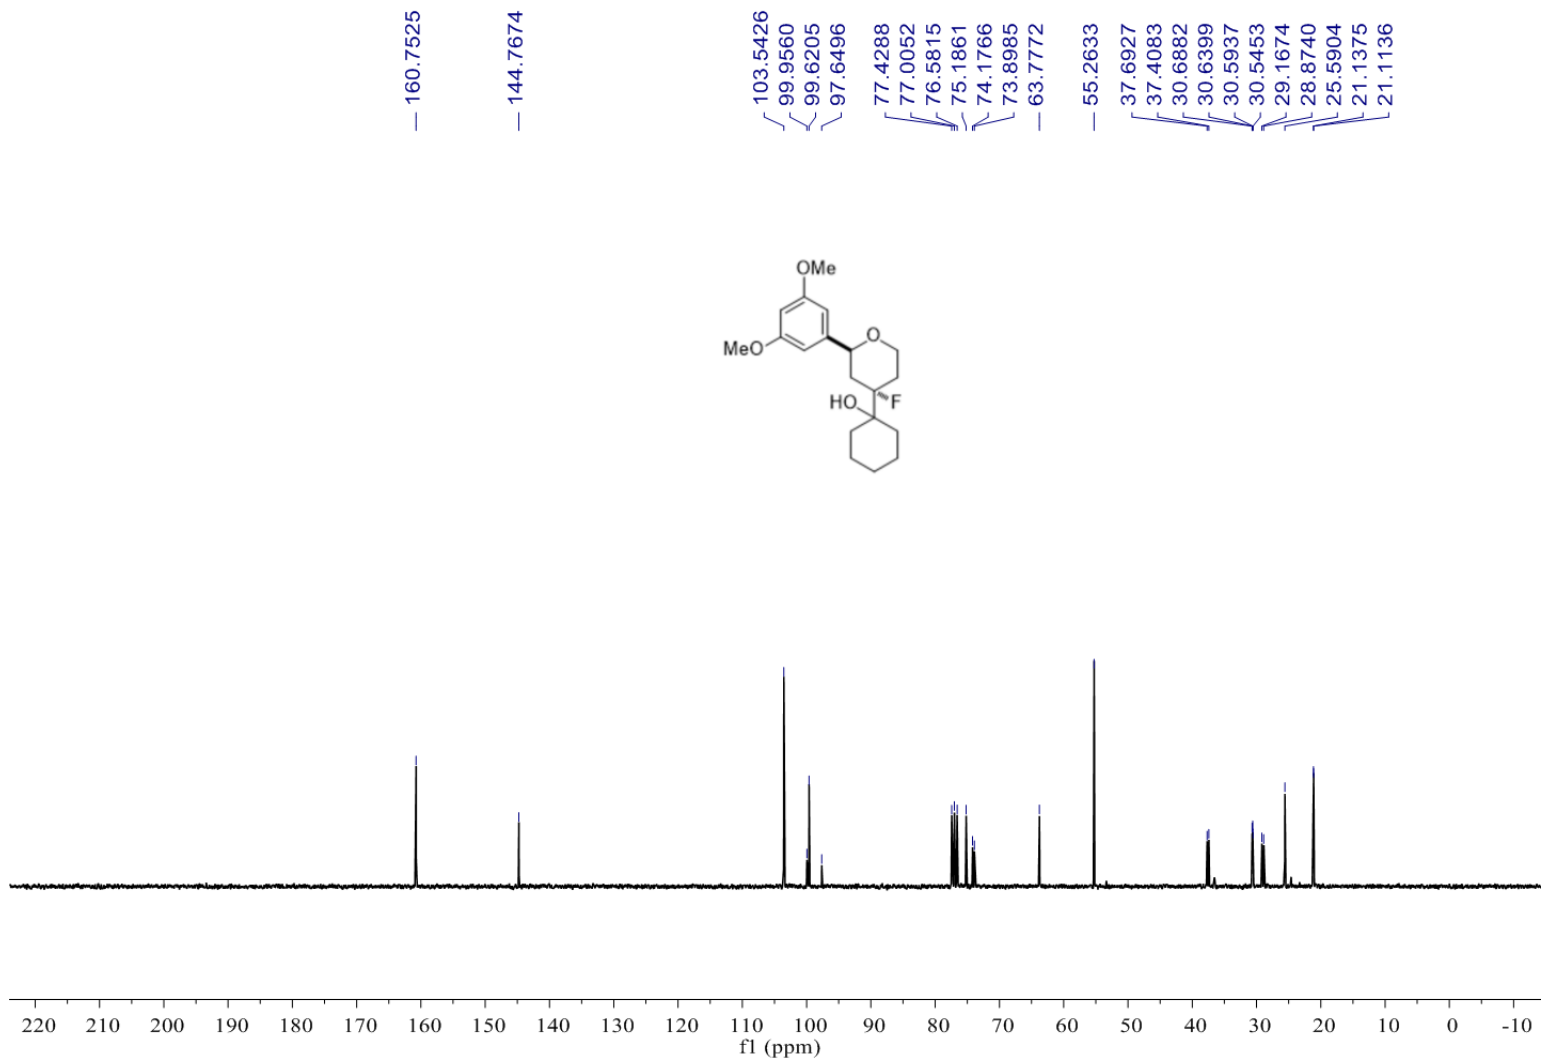

Compound 7aj

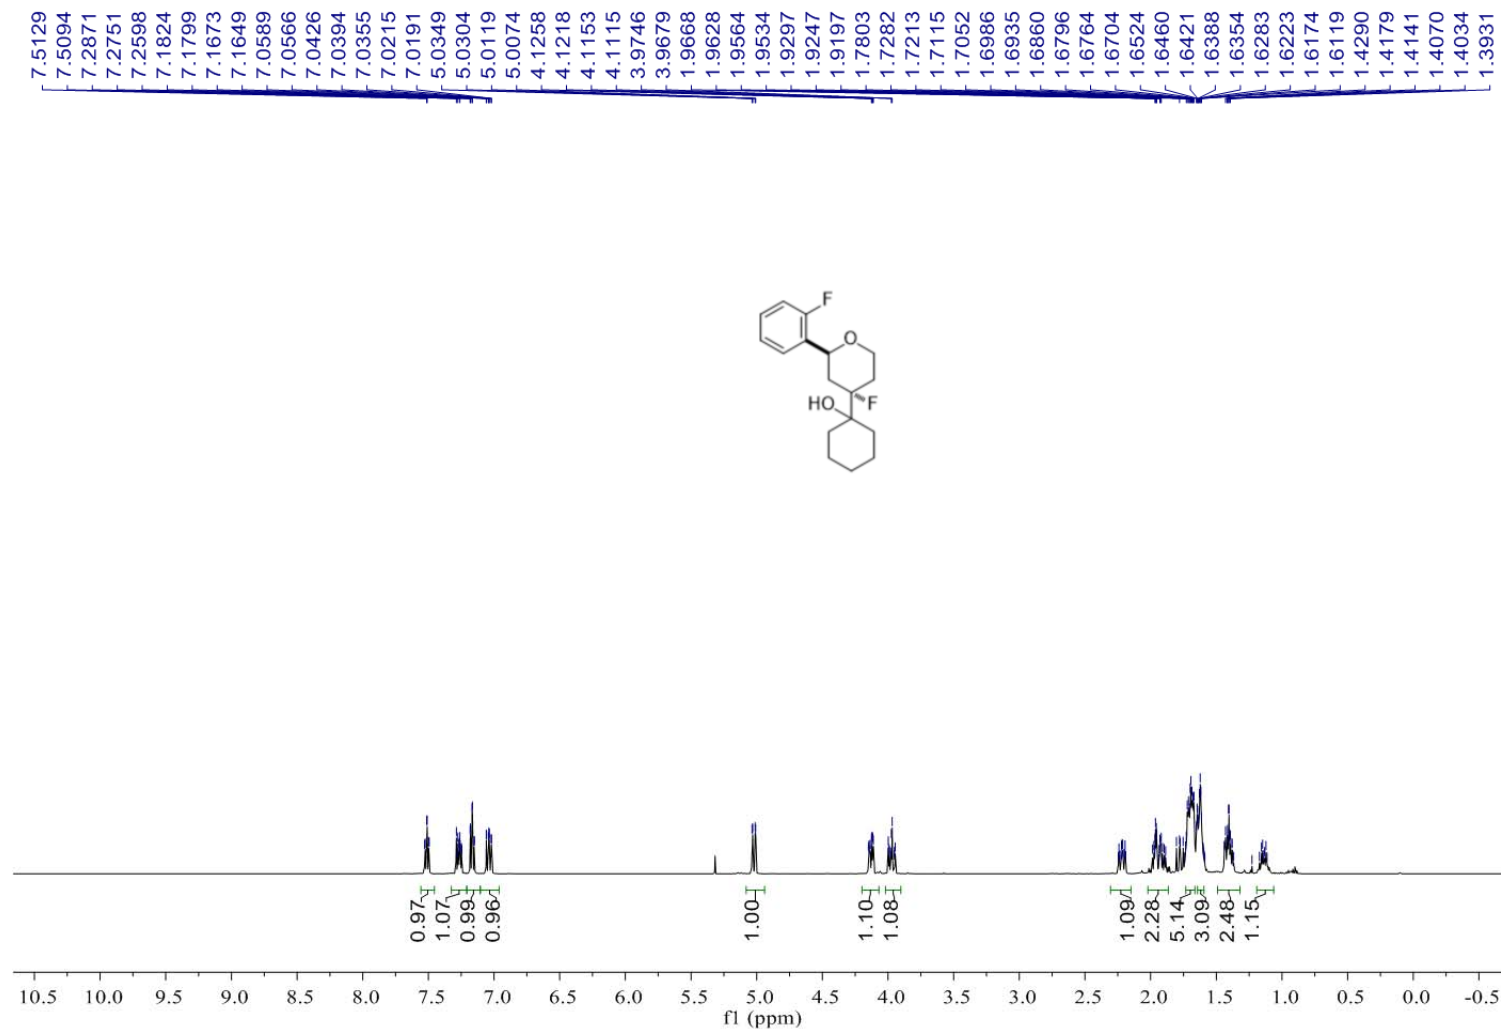





Compound 7ak

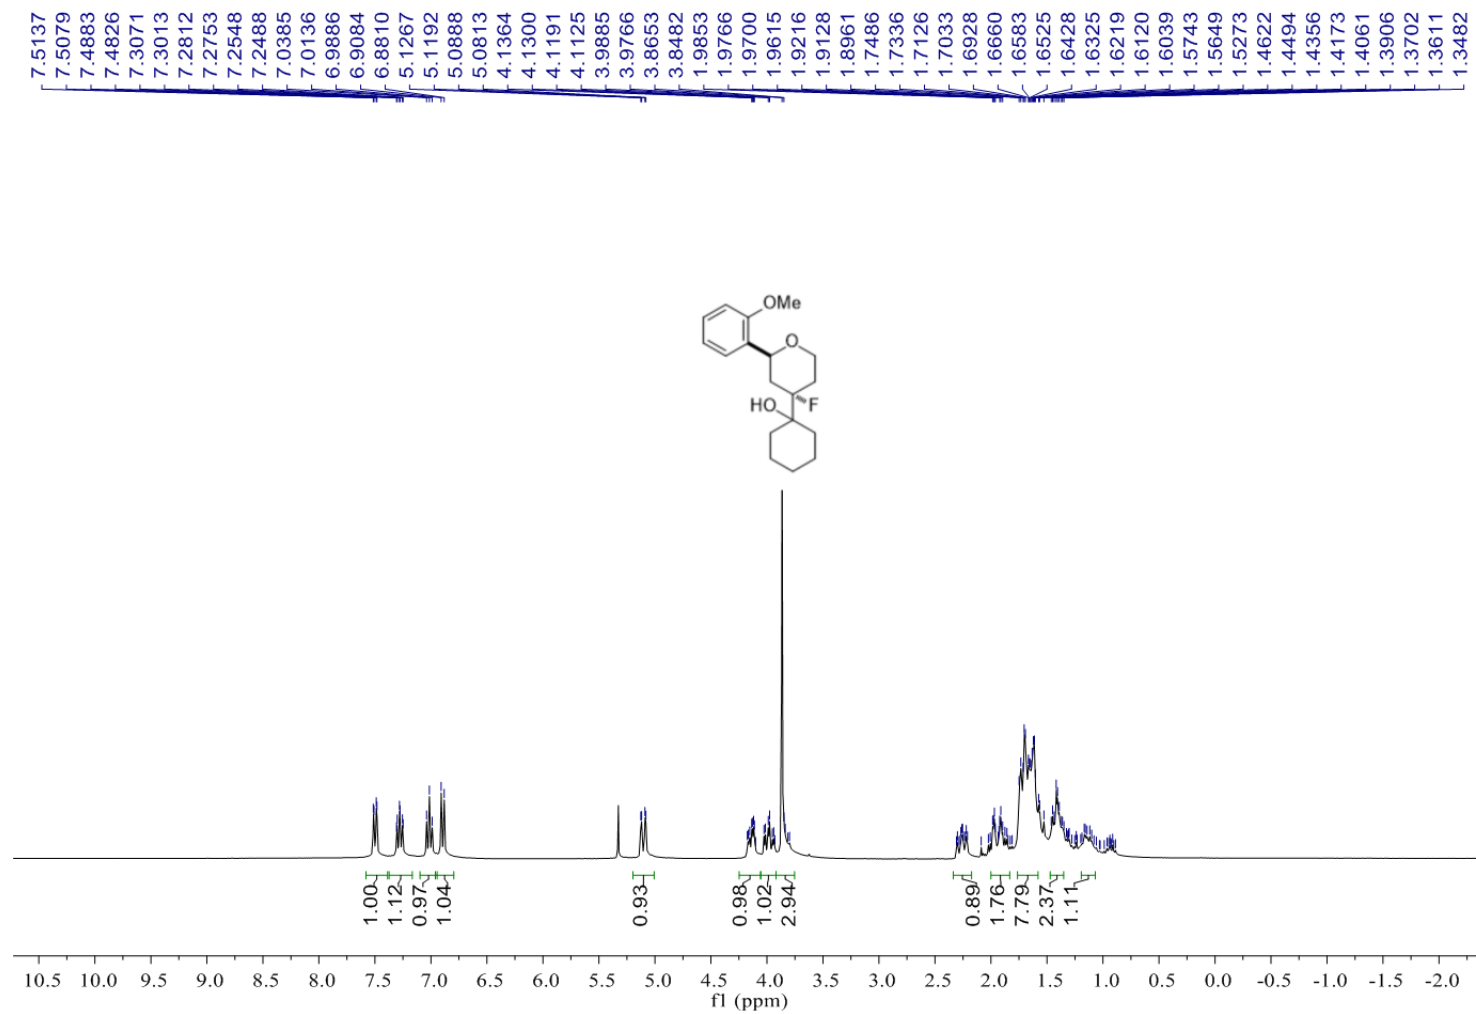

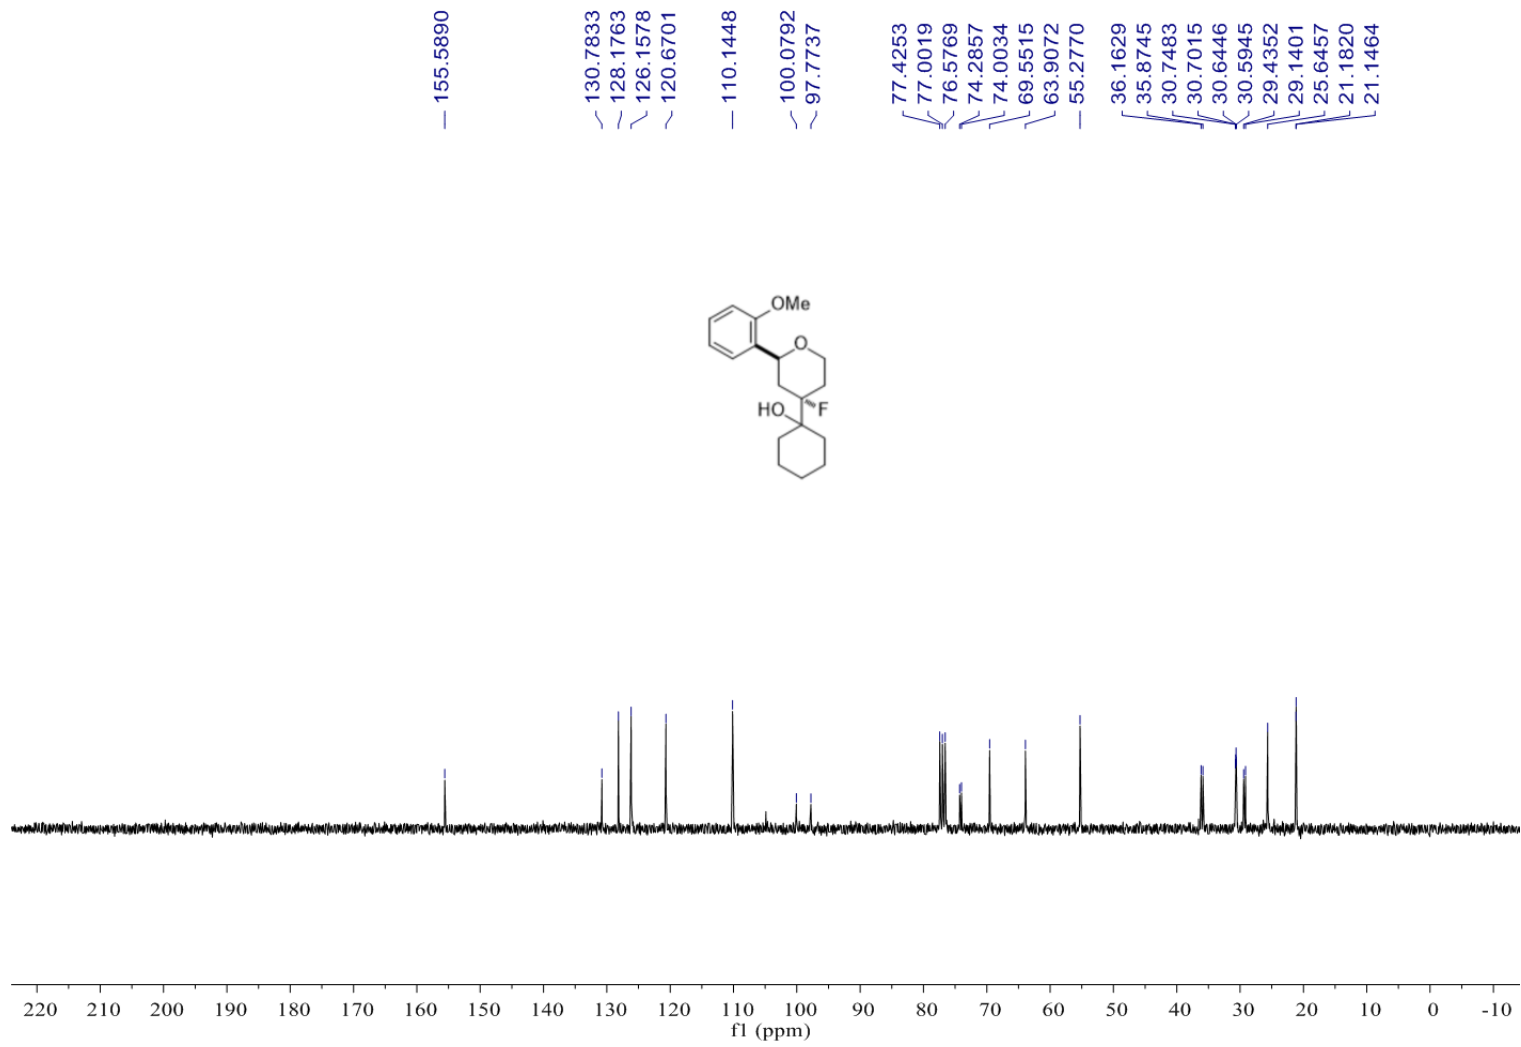

Compound 7aI

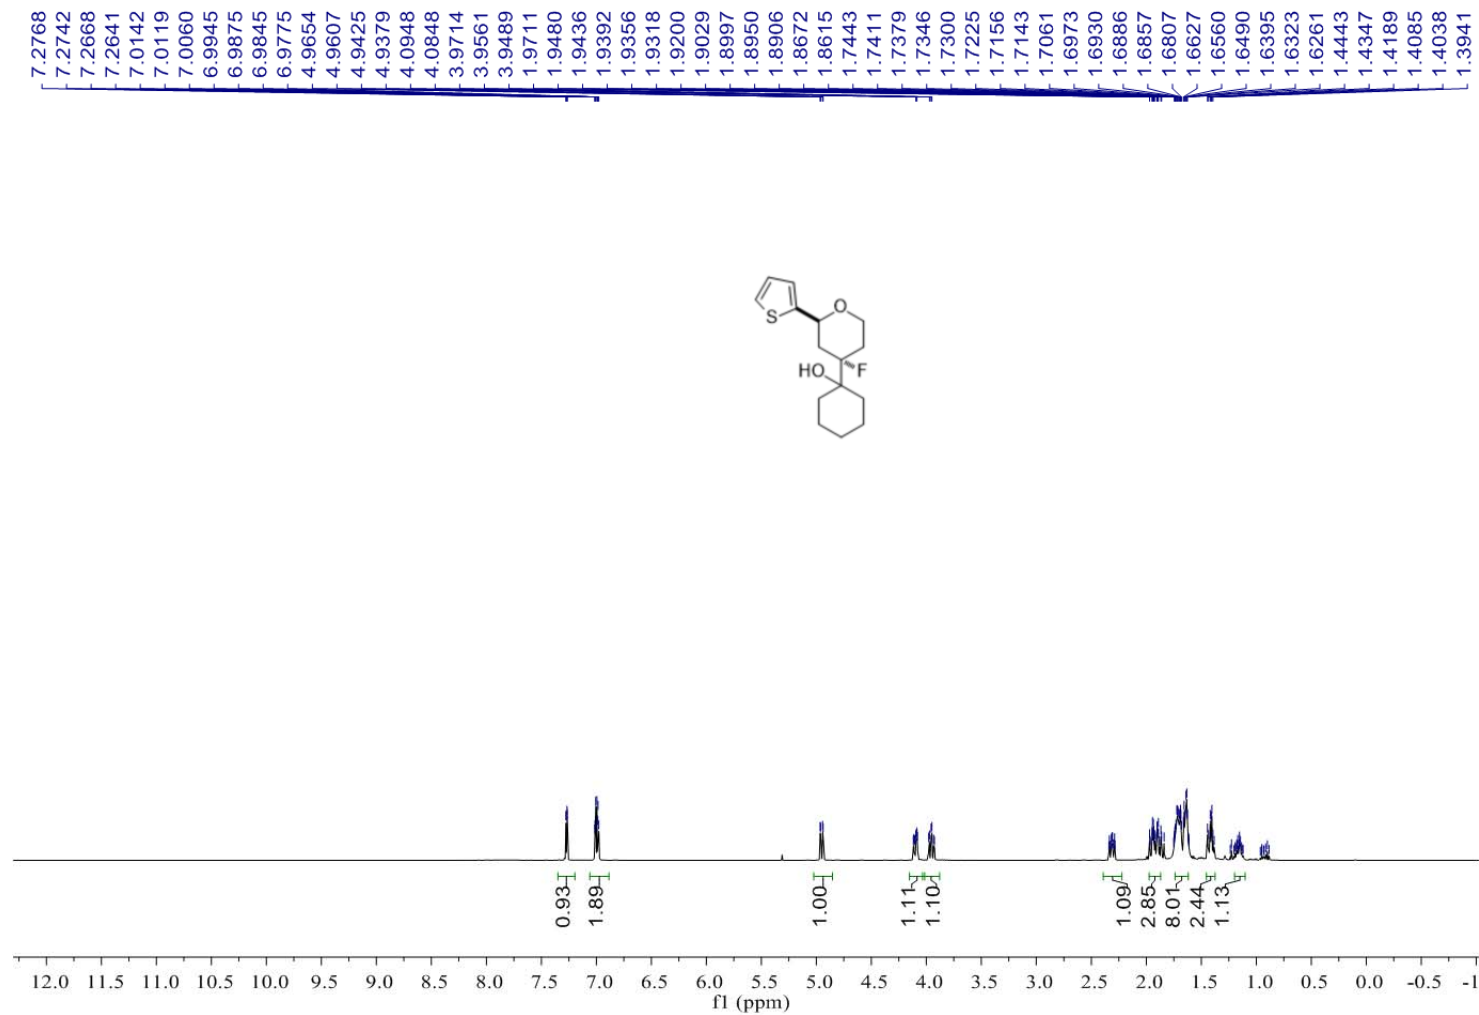

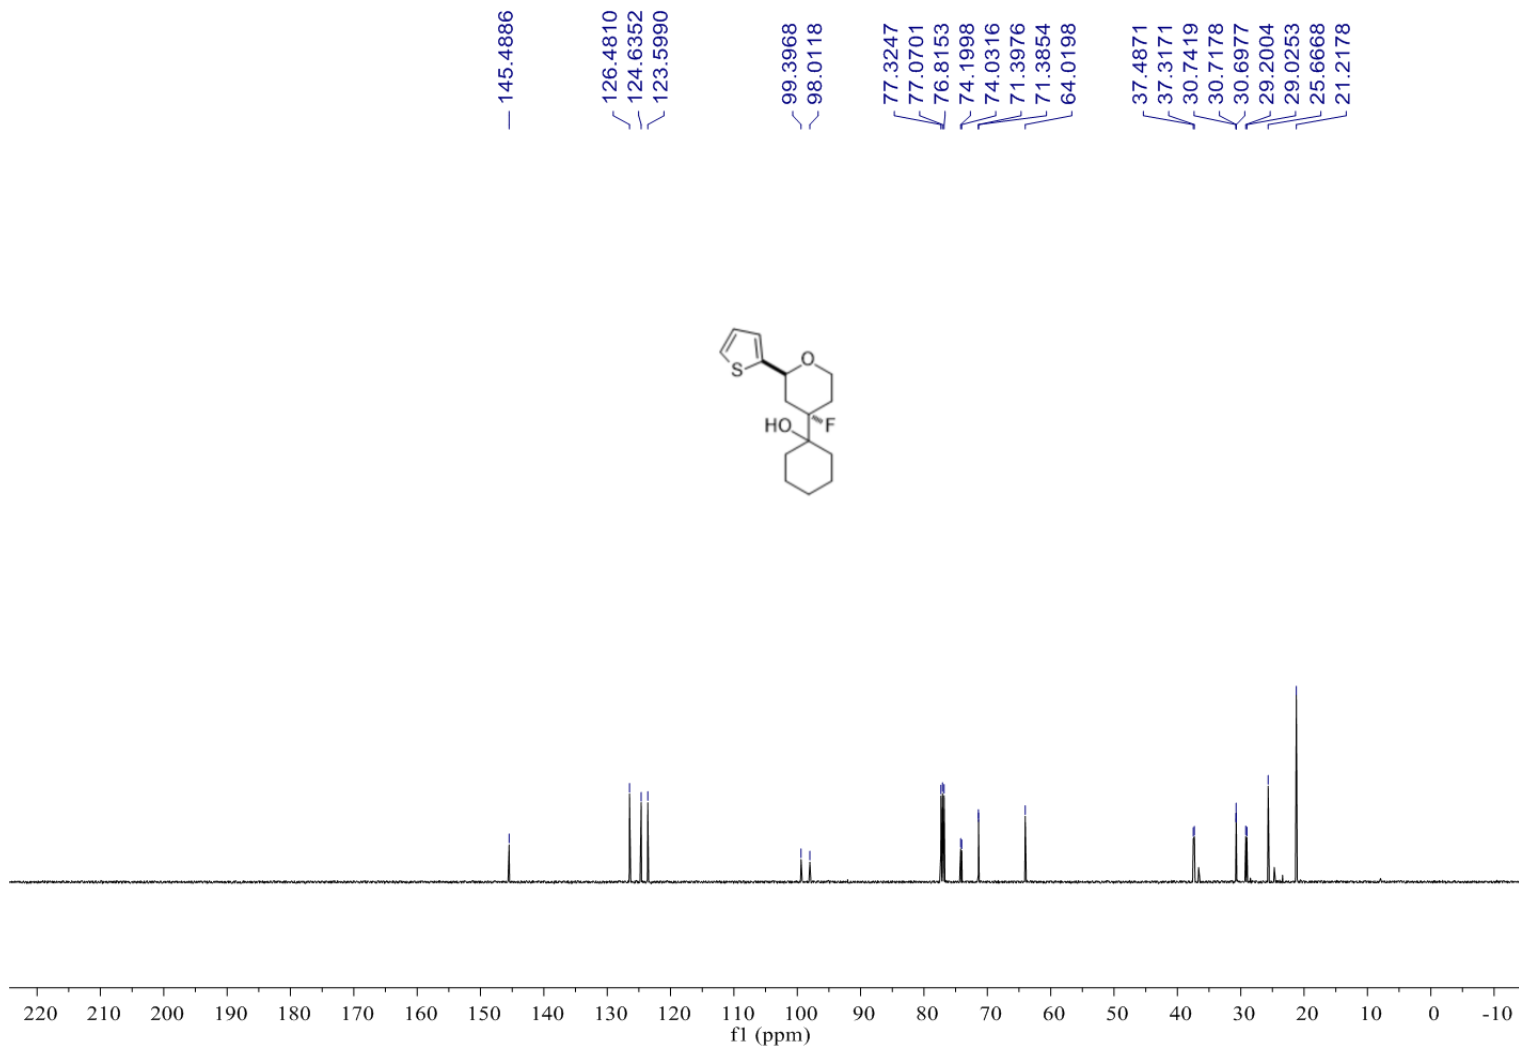

Compound **7am**

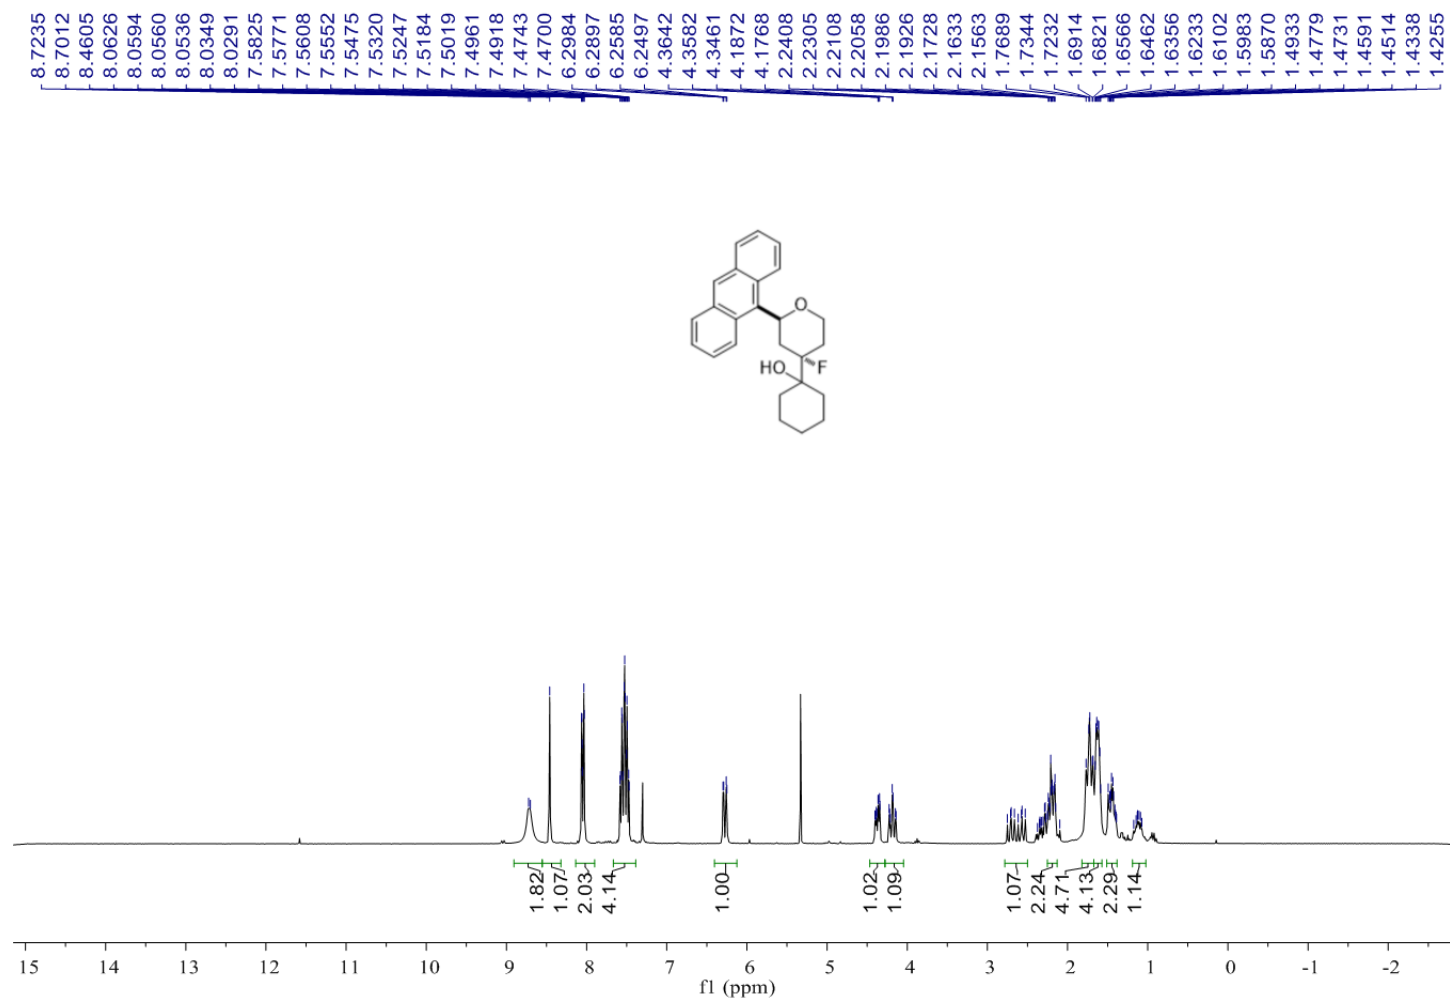

132.1446  
131.6256  
129.2703  
129.1095  
128.2182  
125.6432  
124.6529

100.2905  
97.9844  
77.3955  
76.9713  
76.5477  
74.2937  
74.0097  
72.9892  
64.6501

35.4005  
35.1102  
30.7162  
30.6689  
30.5928  
30.5479  
29.4540  
29.1612  
25.5512  
21.1598  
21.0829

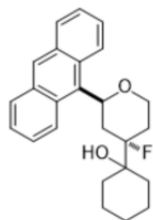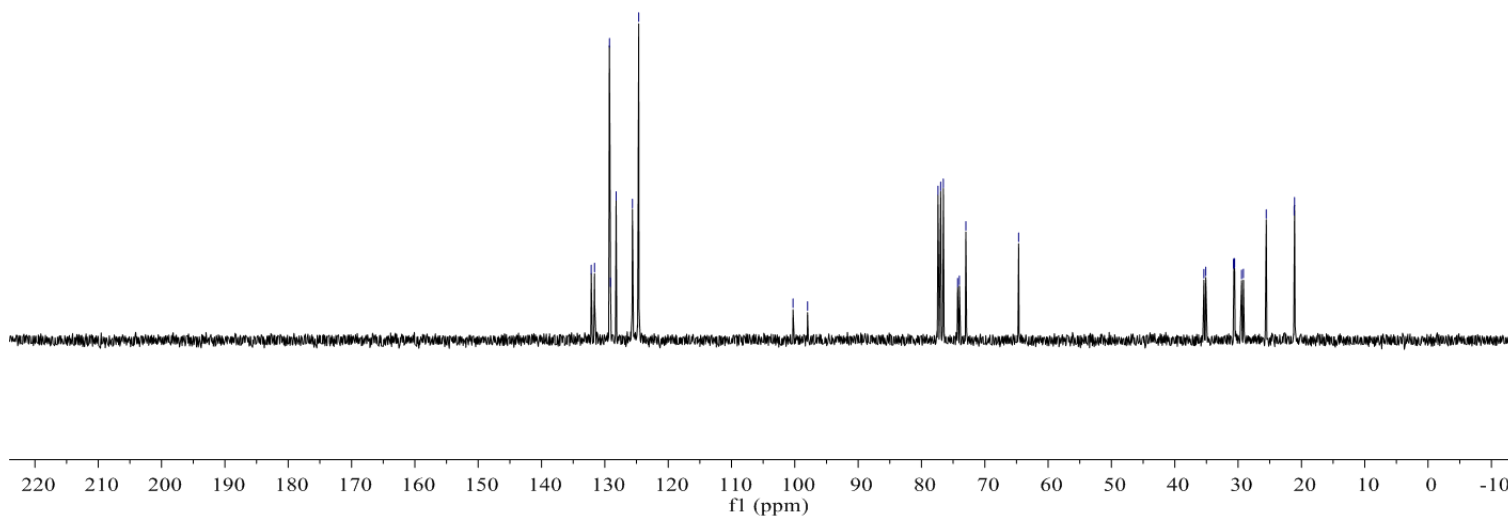

Compound 7an

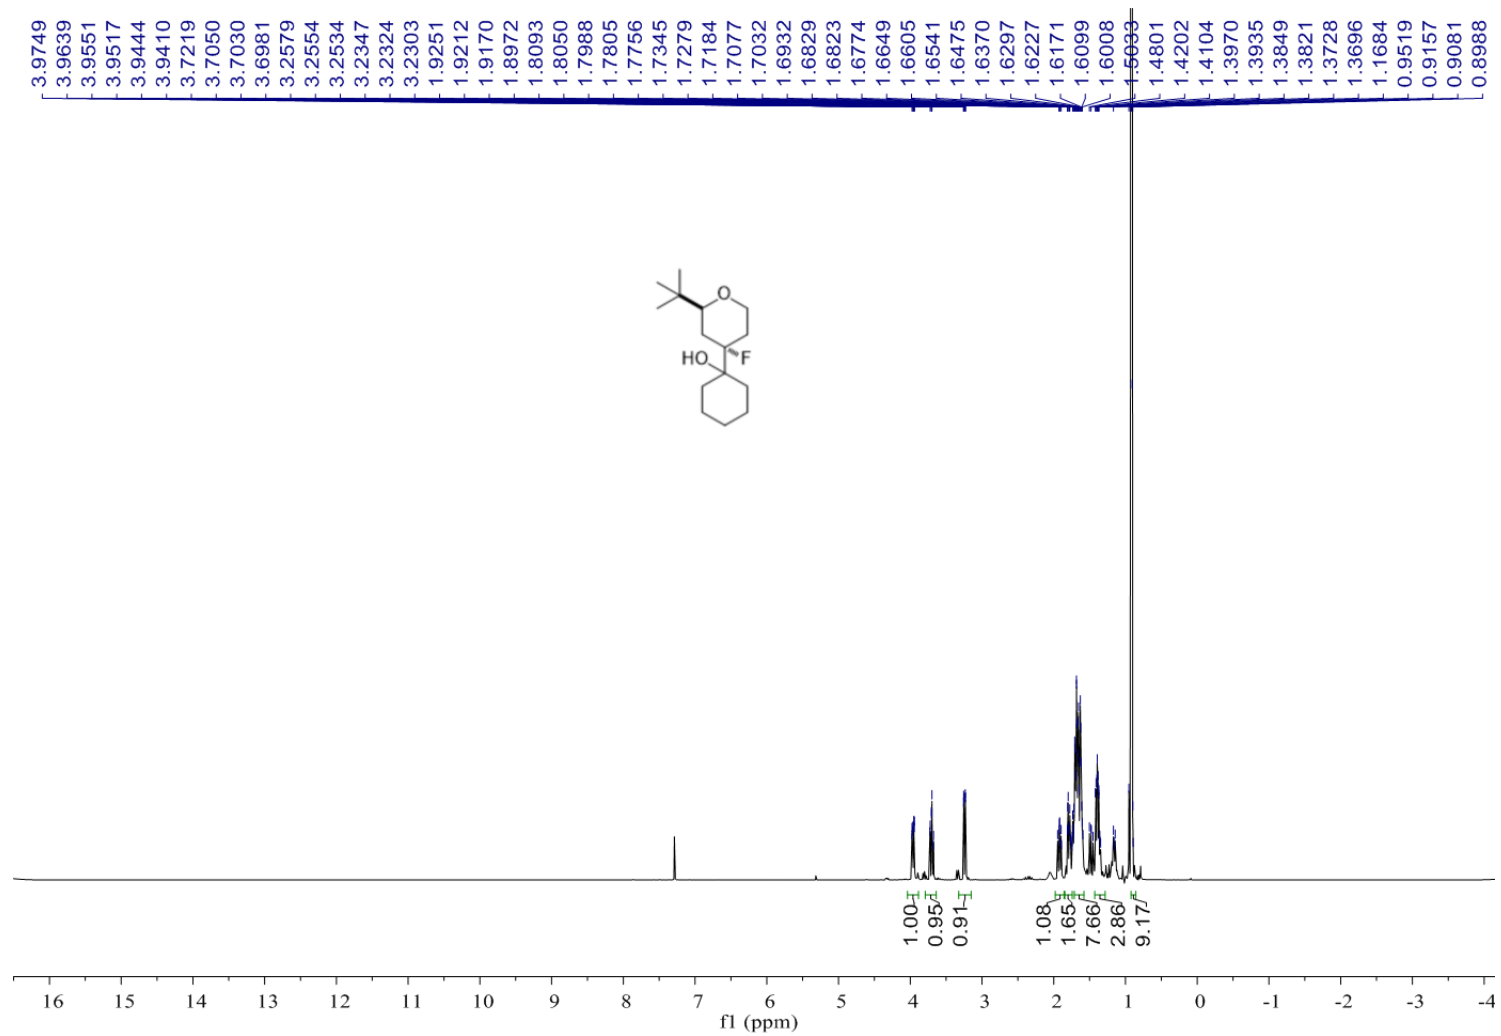



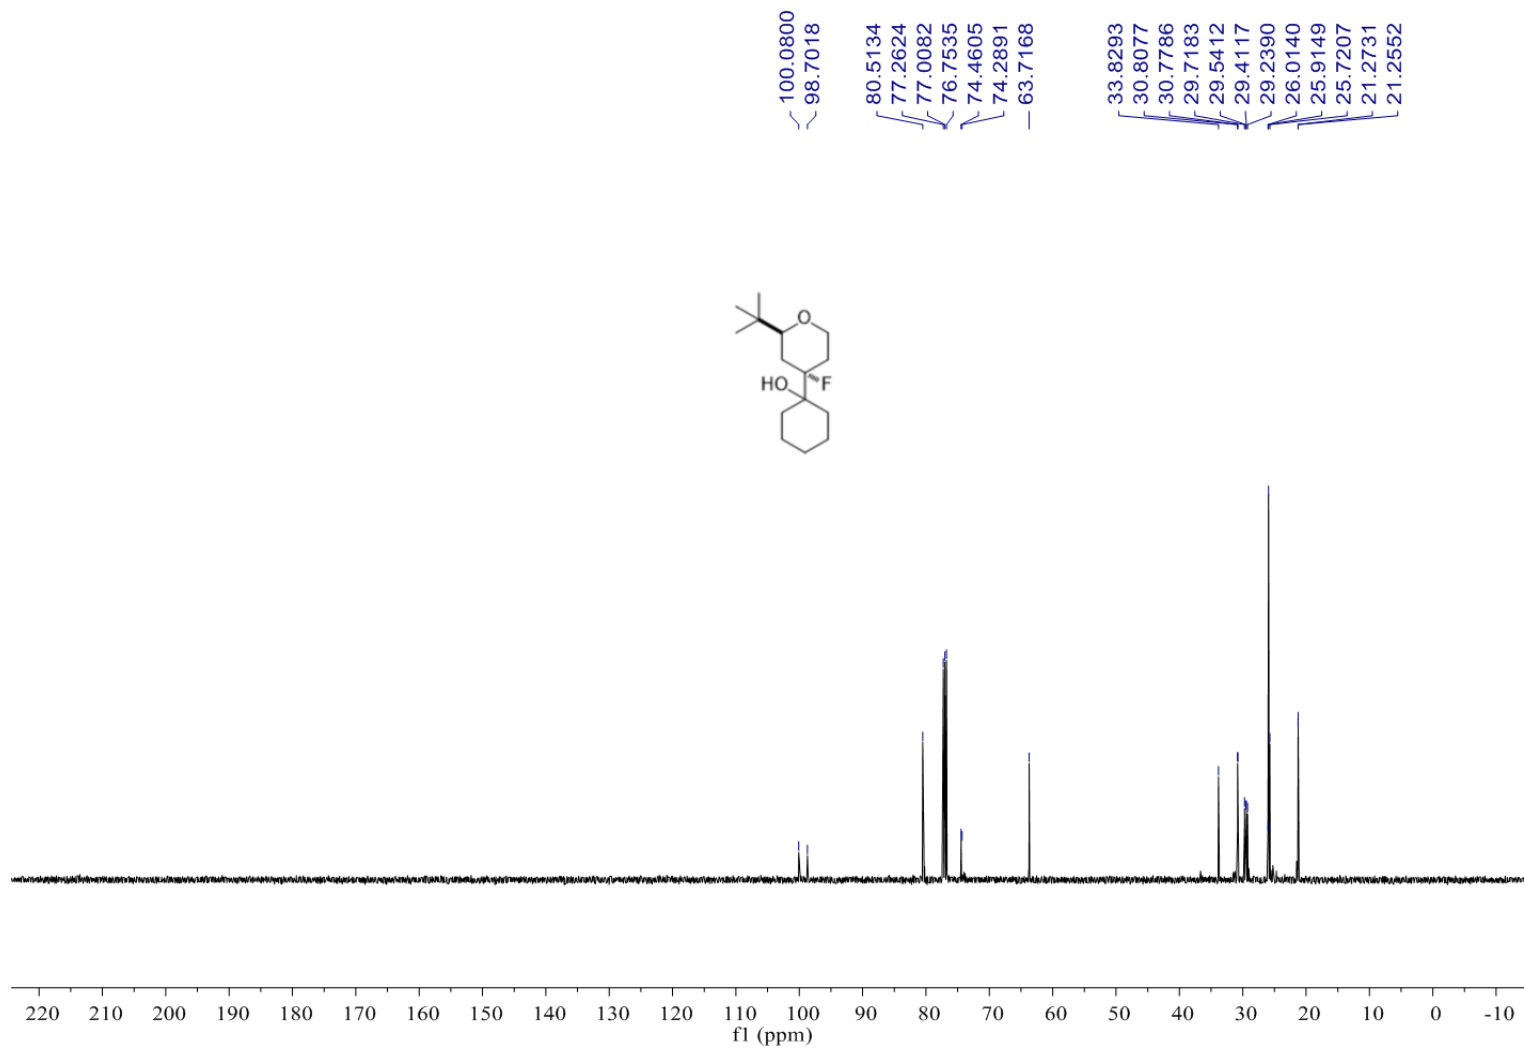

Compound **7ao**

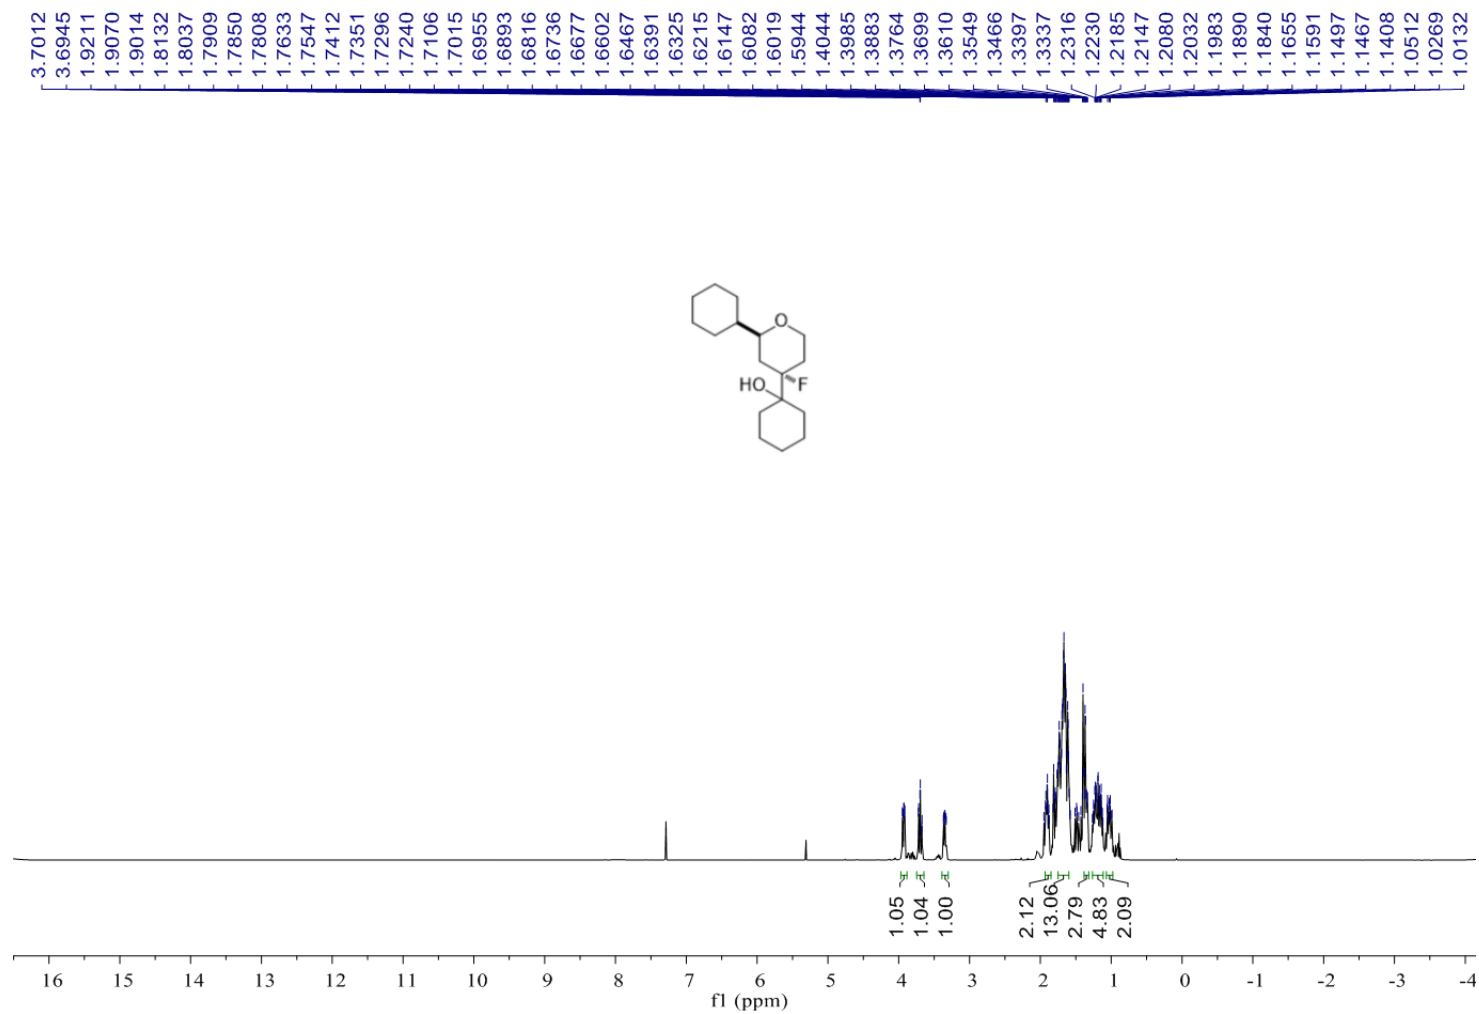

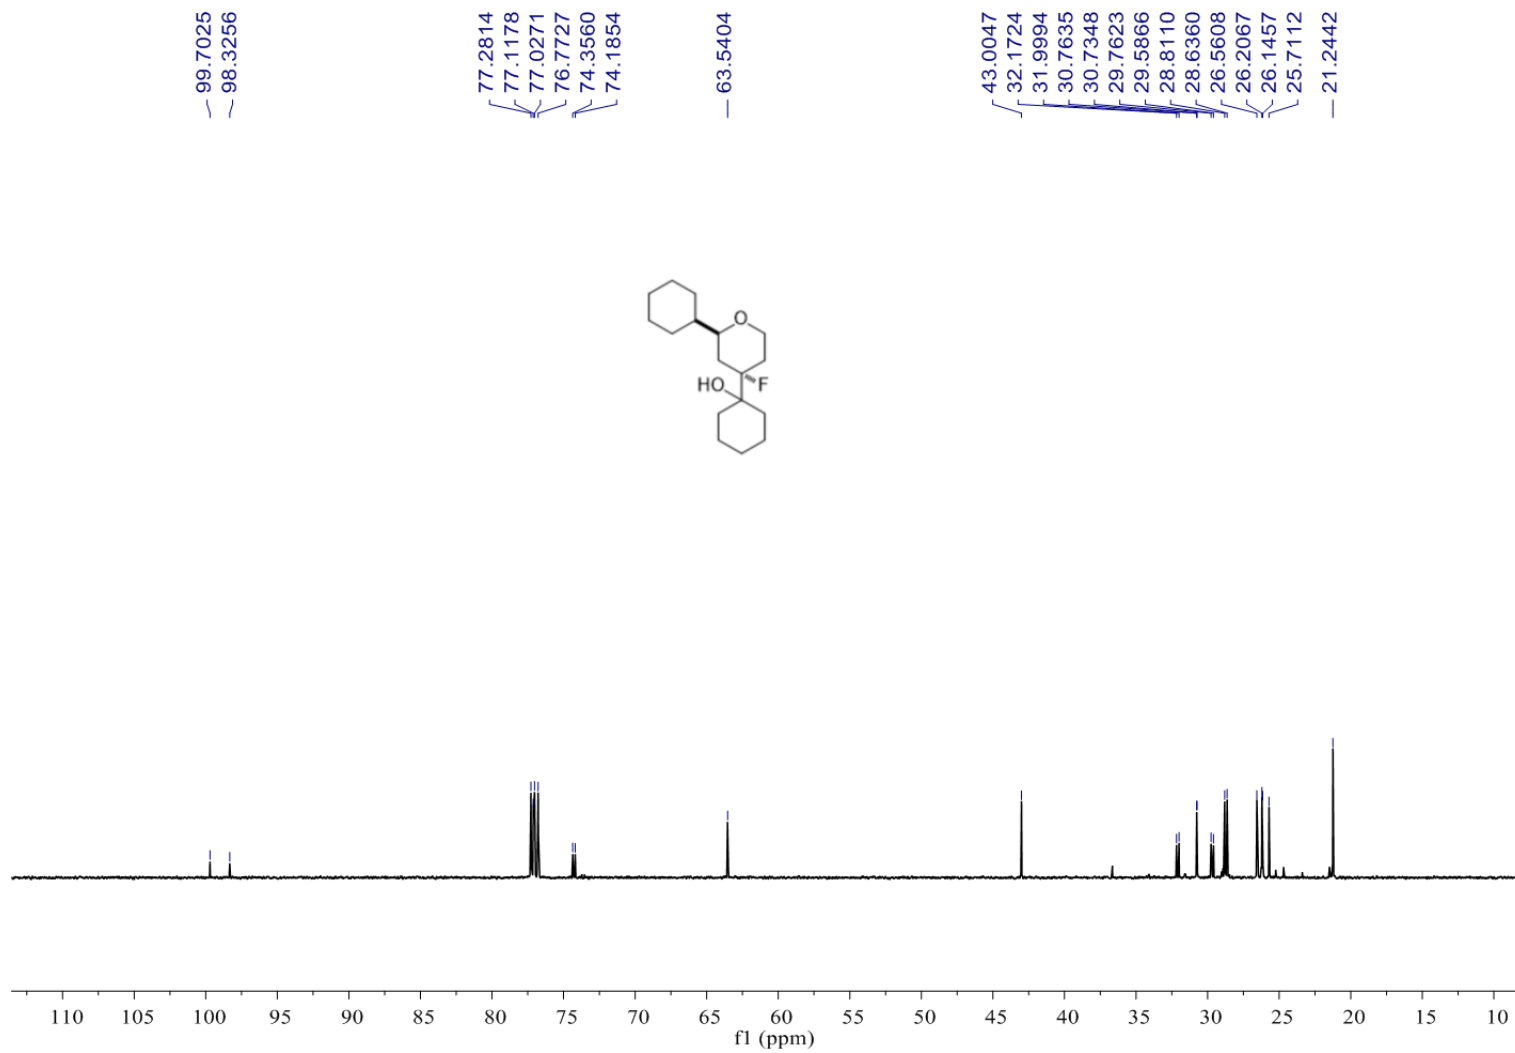

Compound 7ba

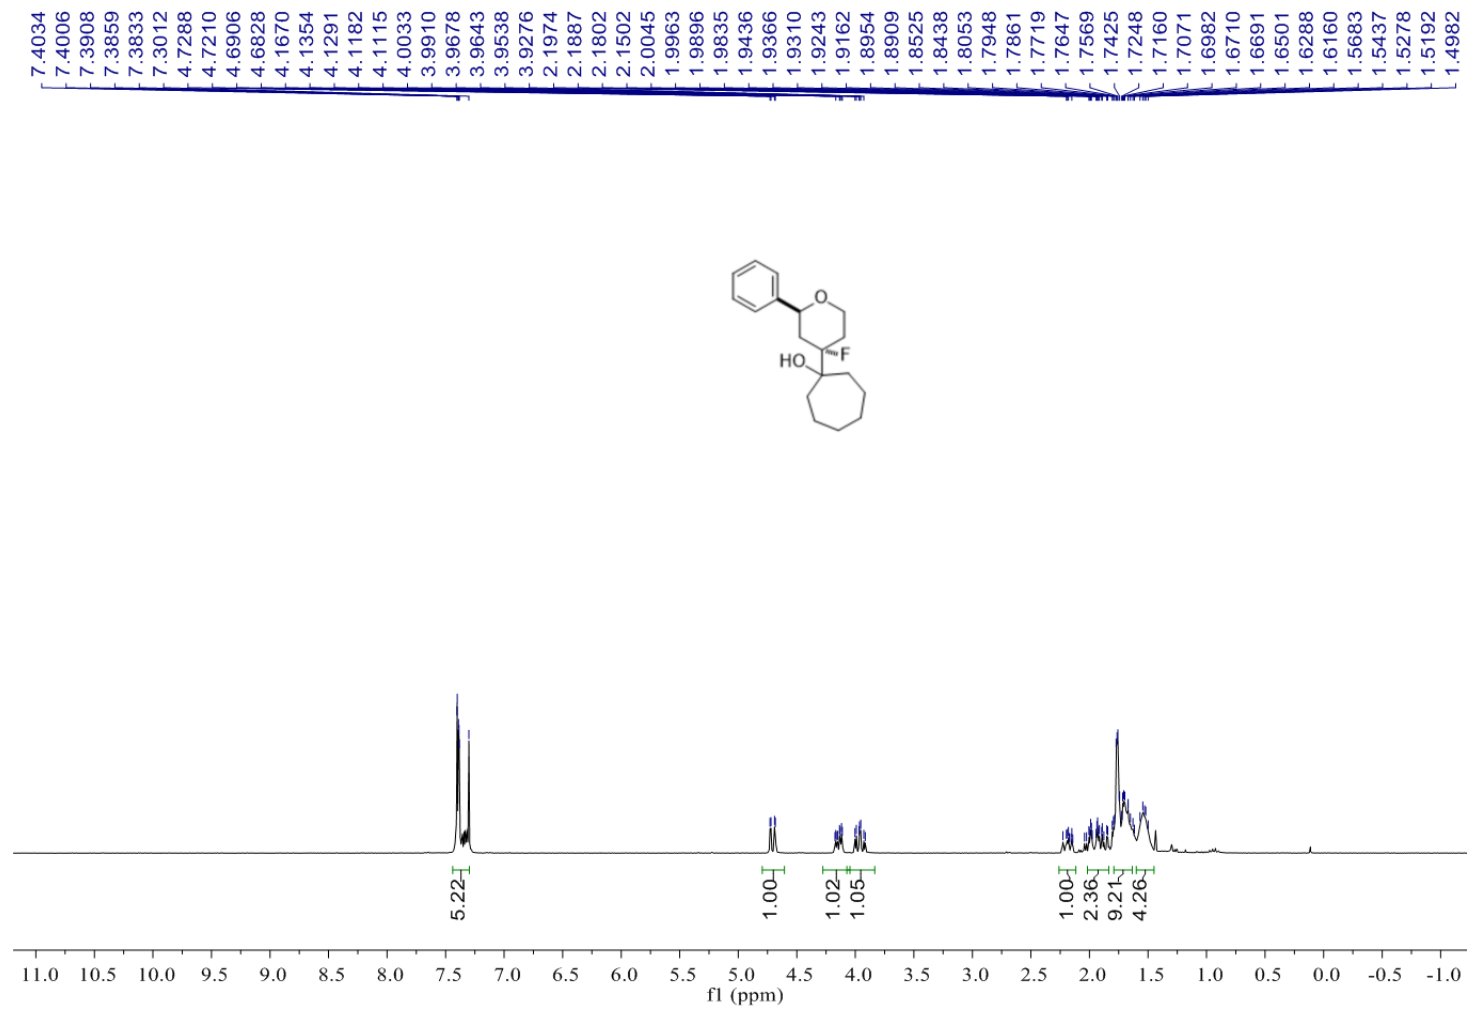

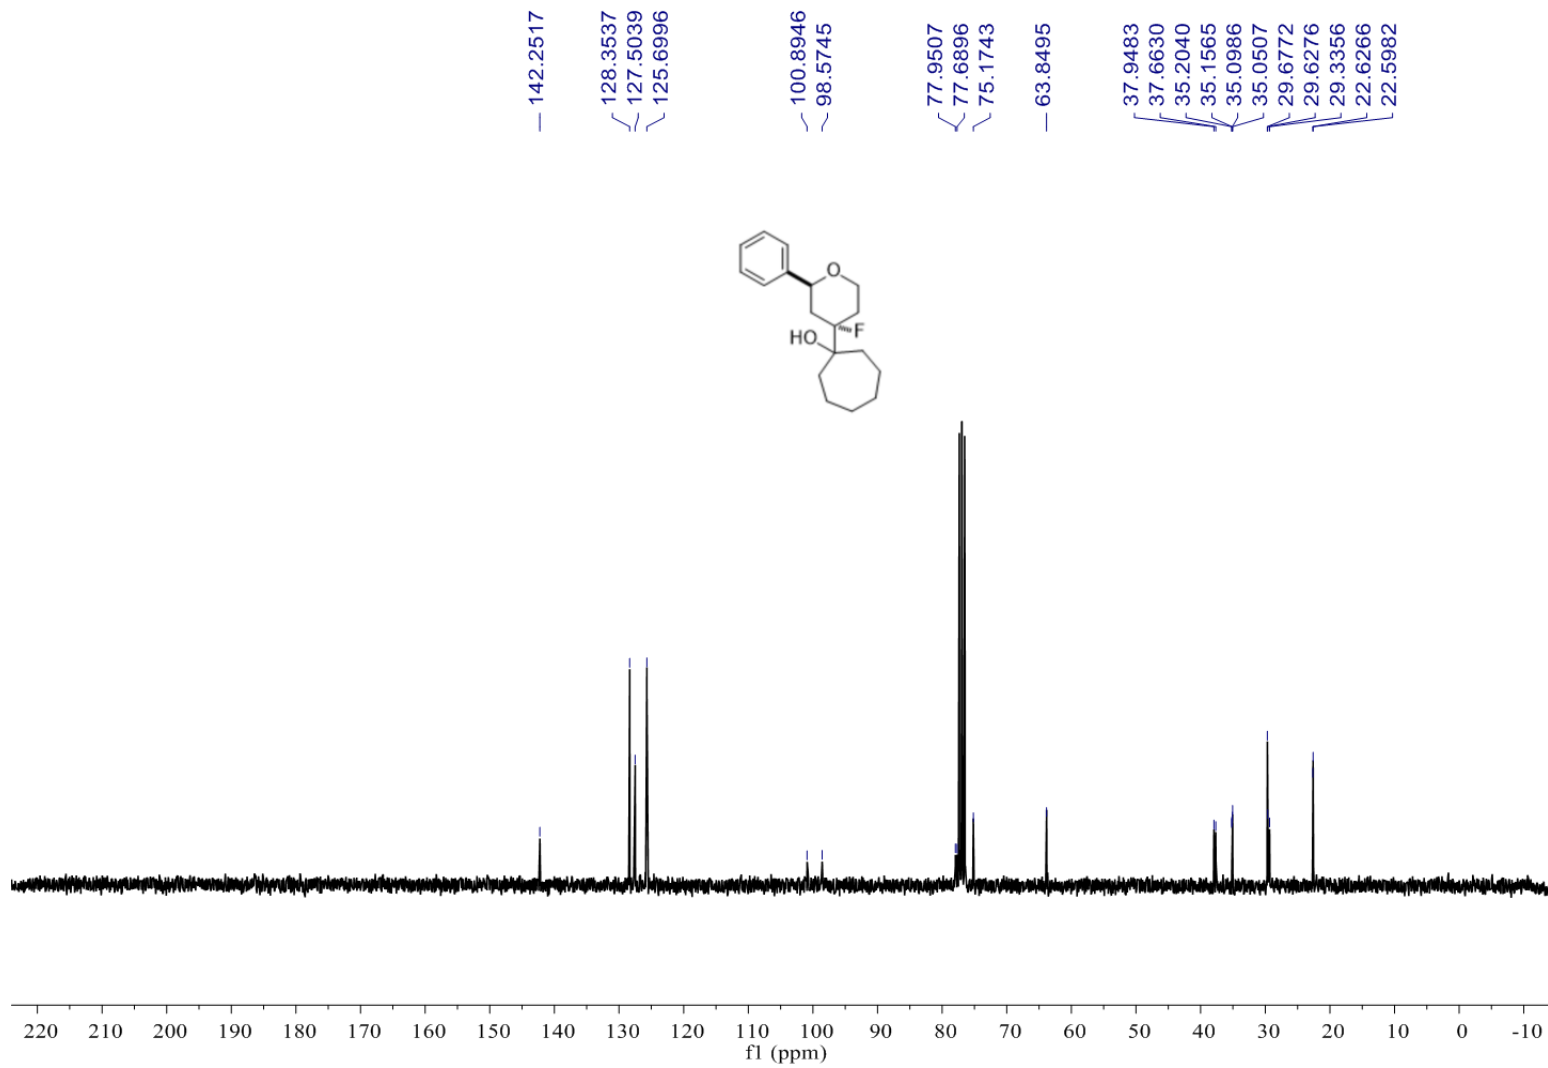

Compound **8ca**

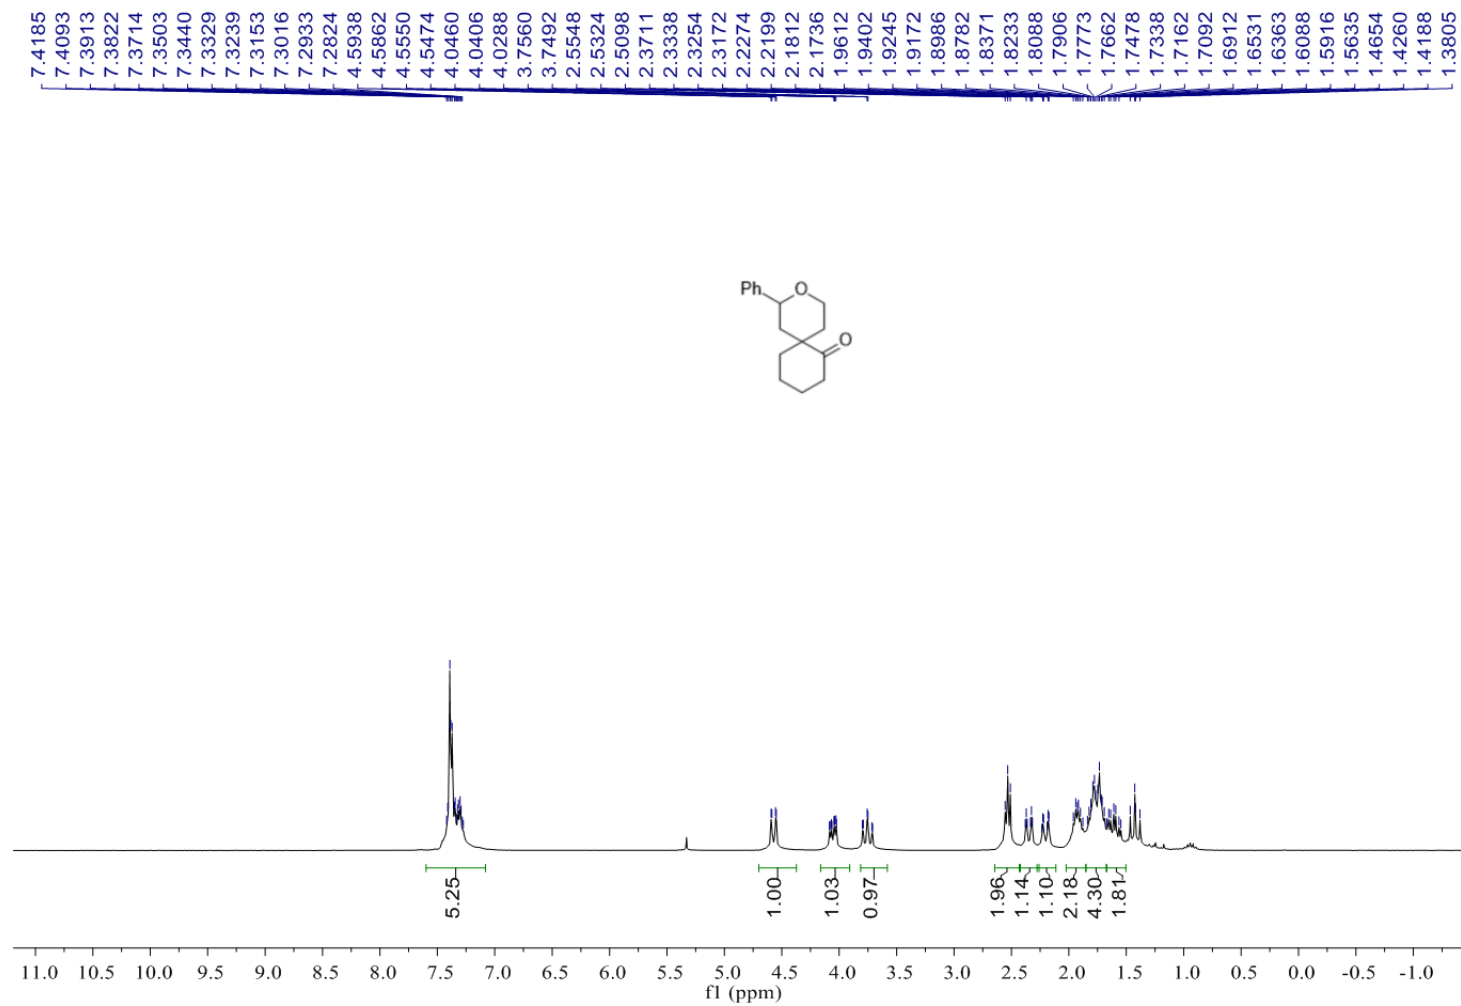

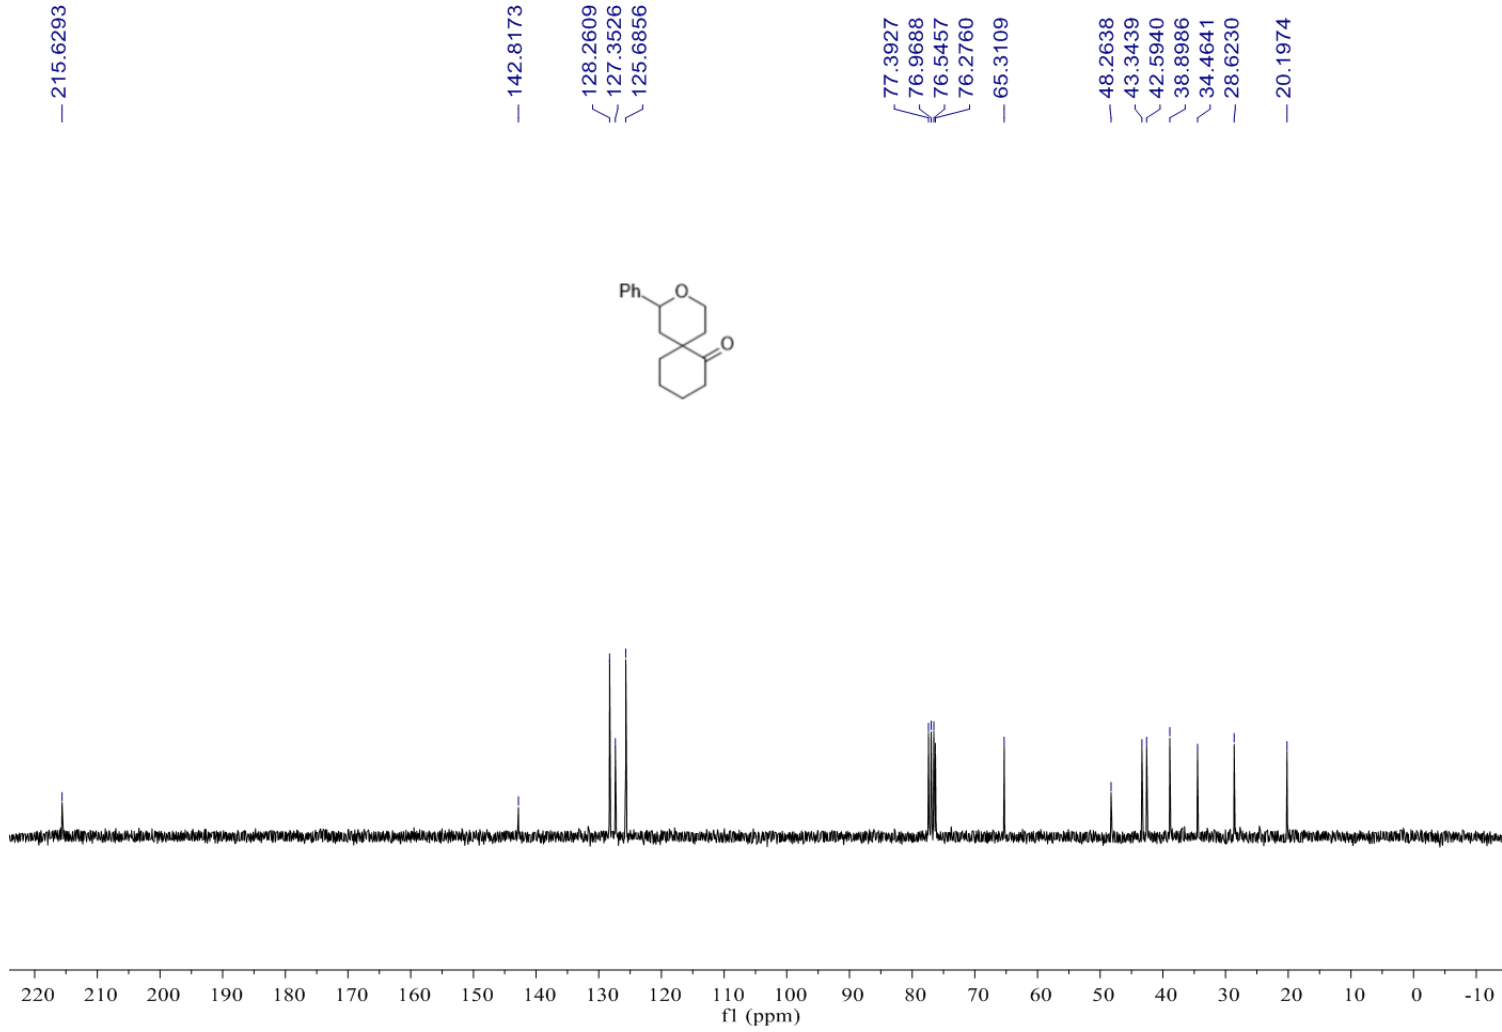

Compound **8cc**

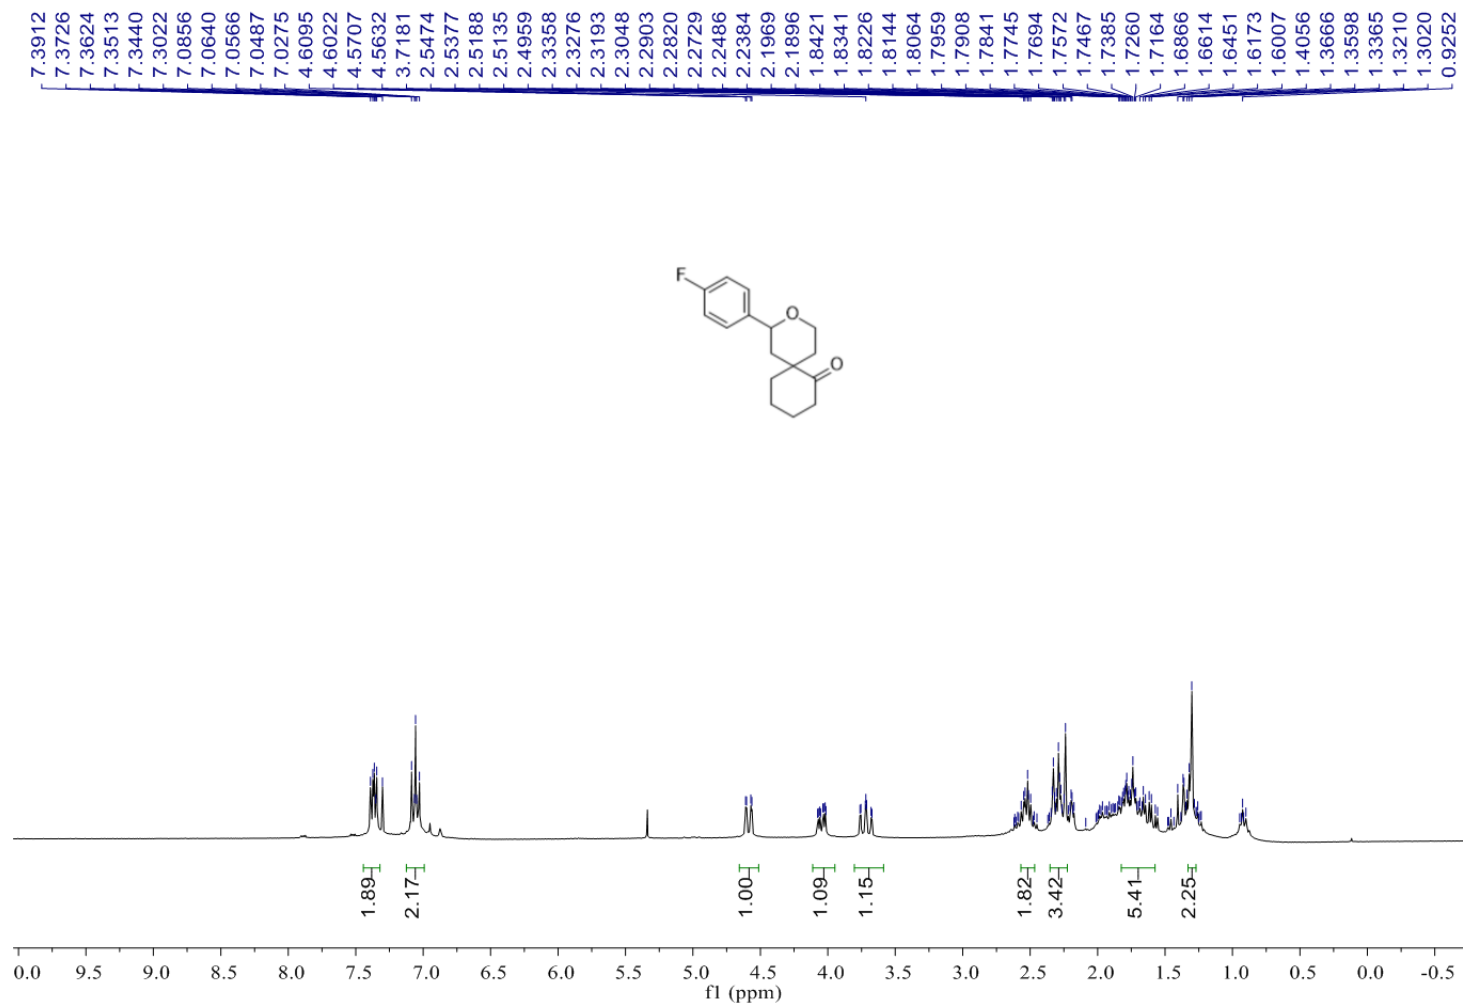



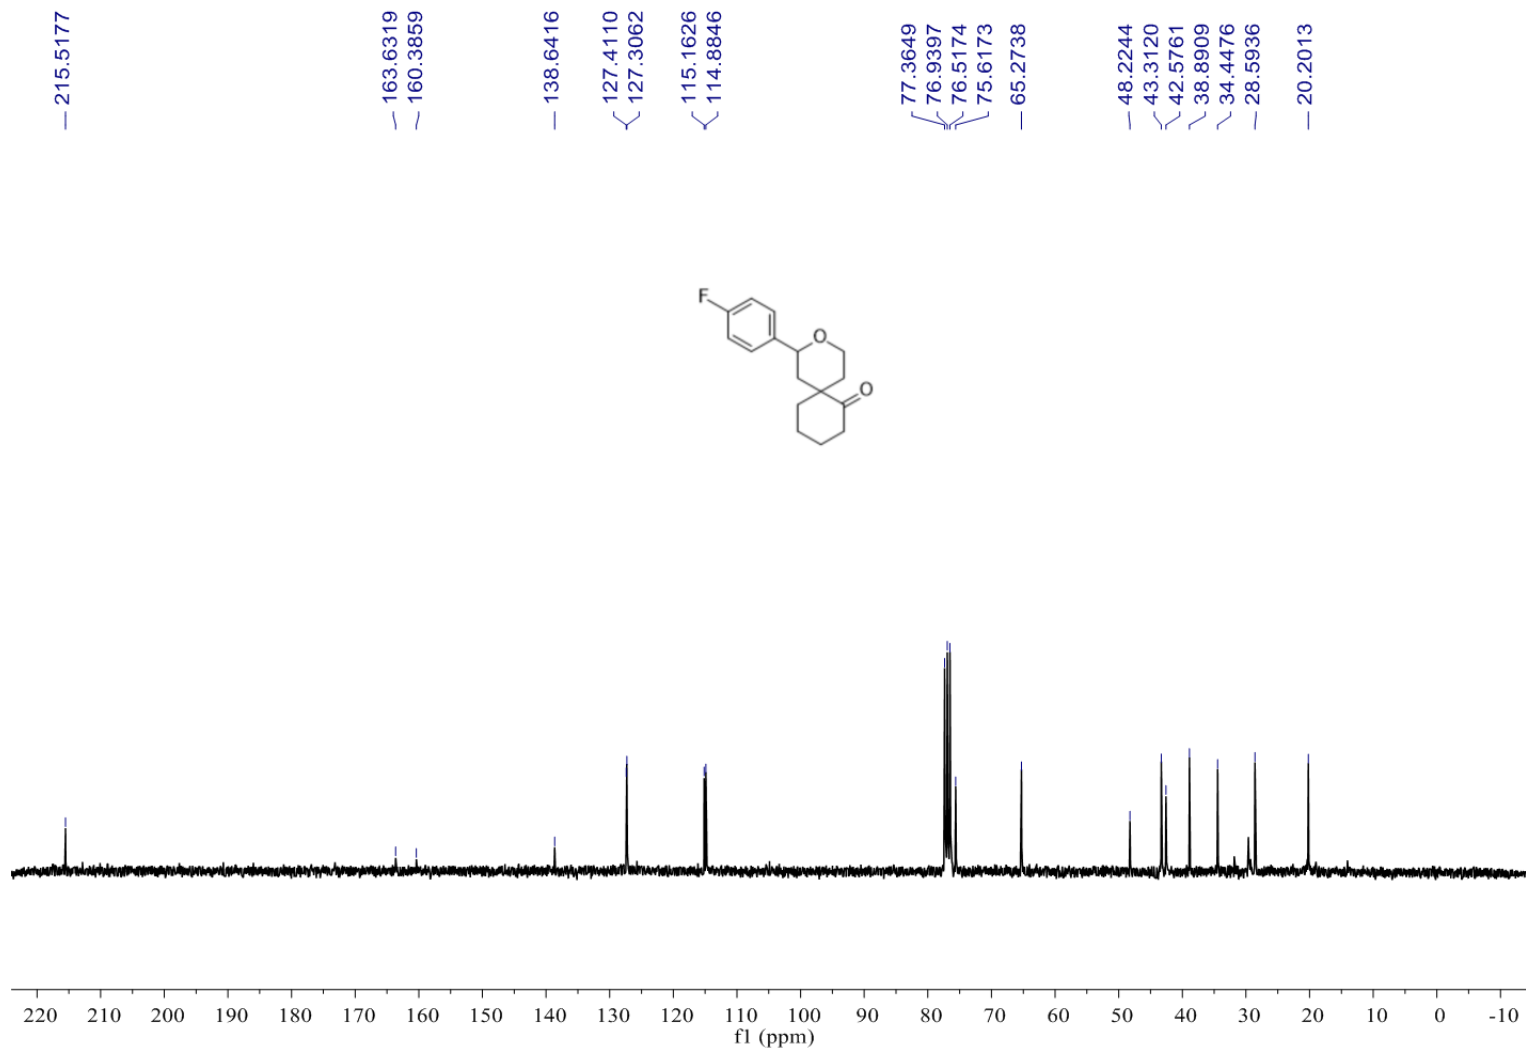

Compound **8ce**

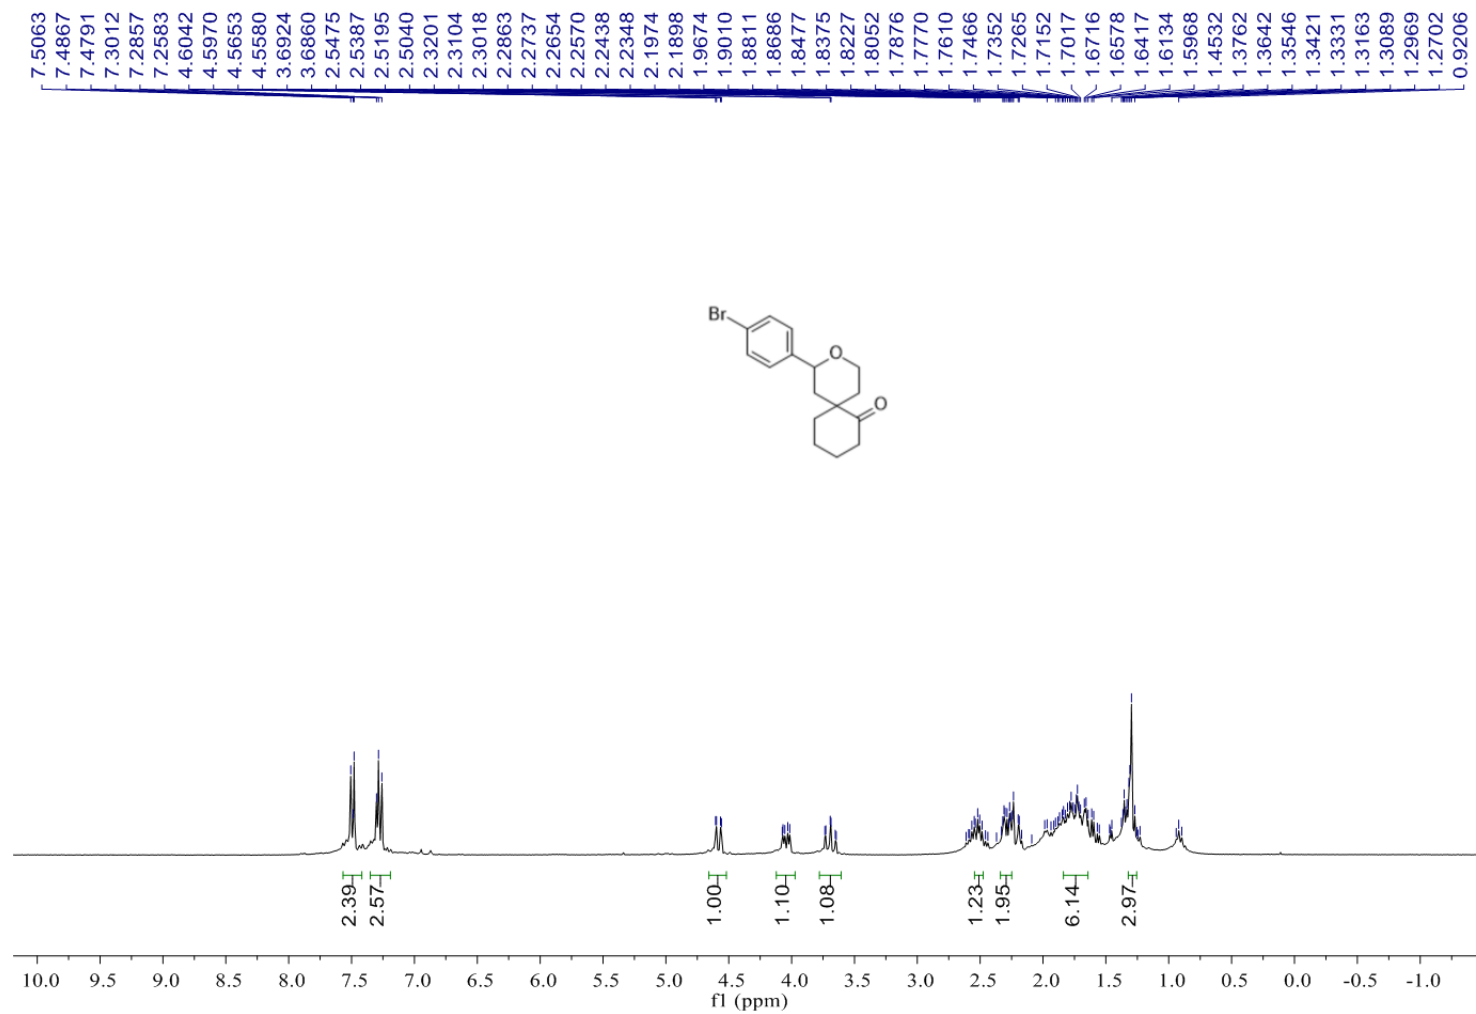

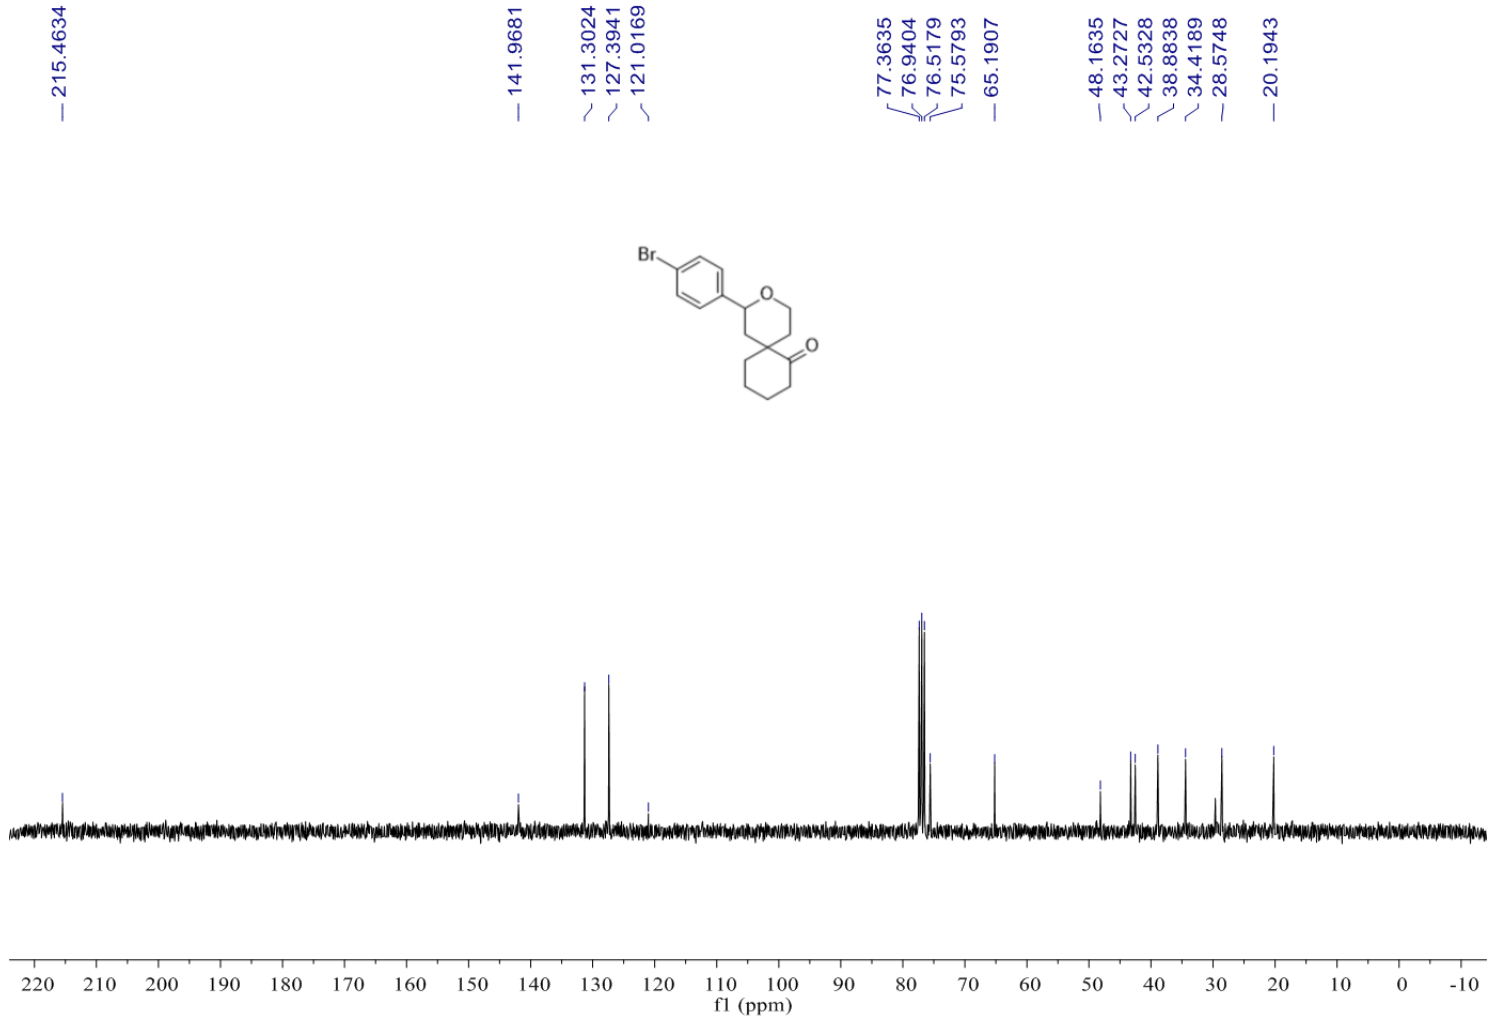

Compound **8cr**

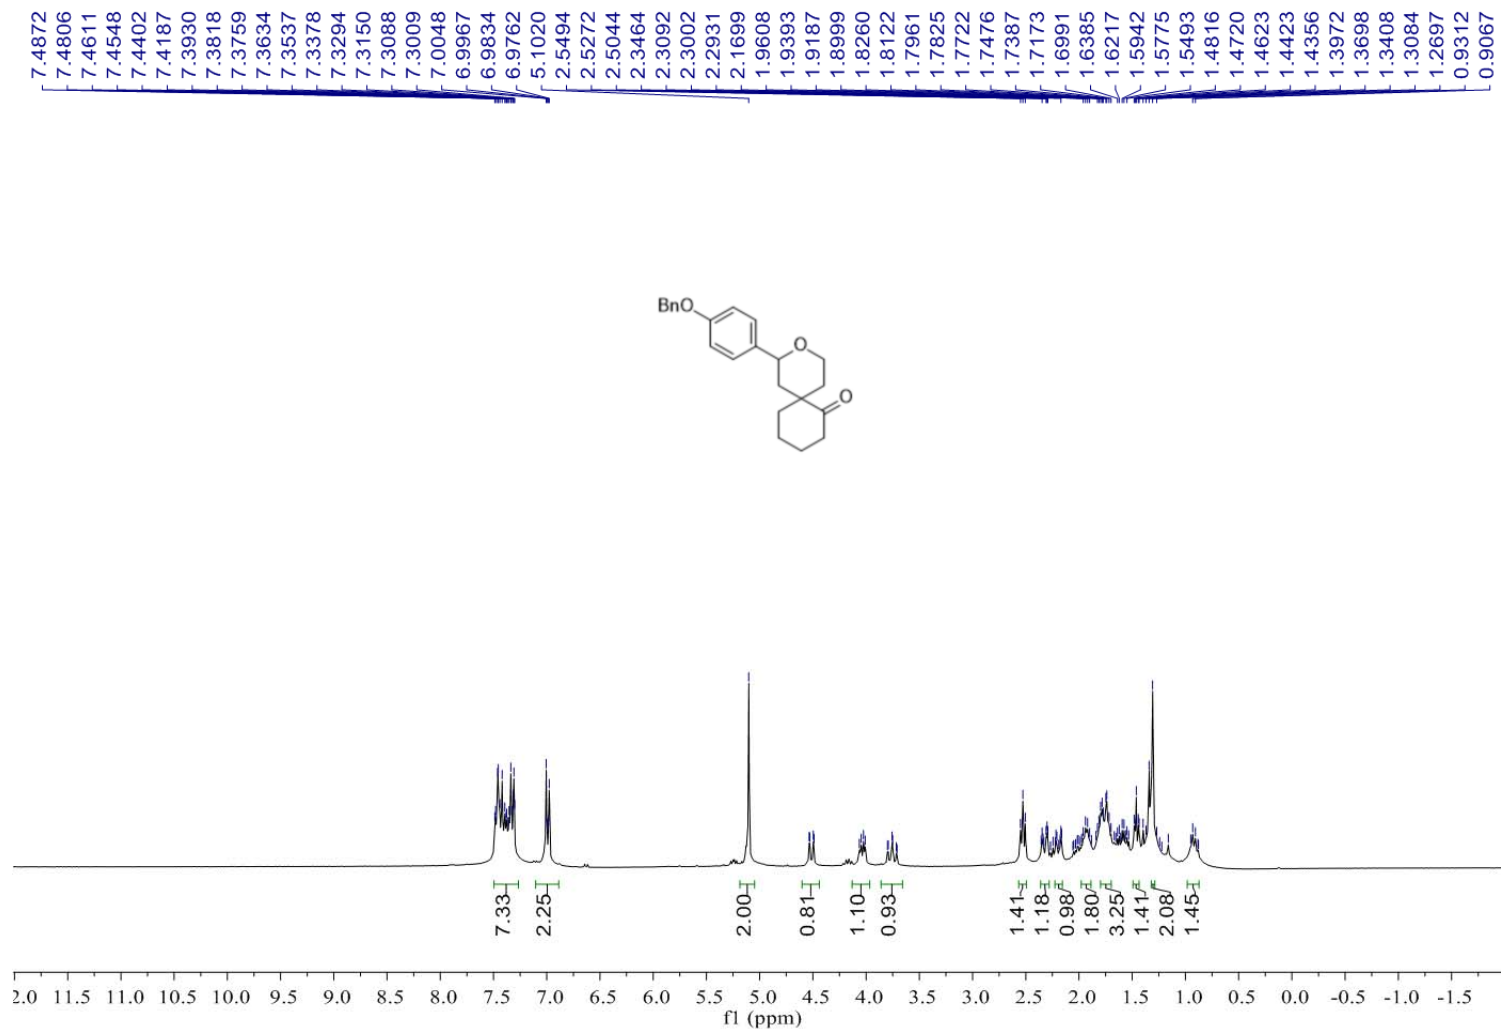

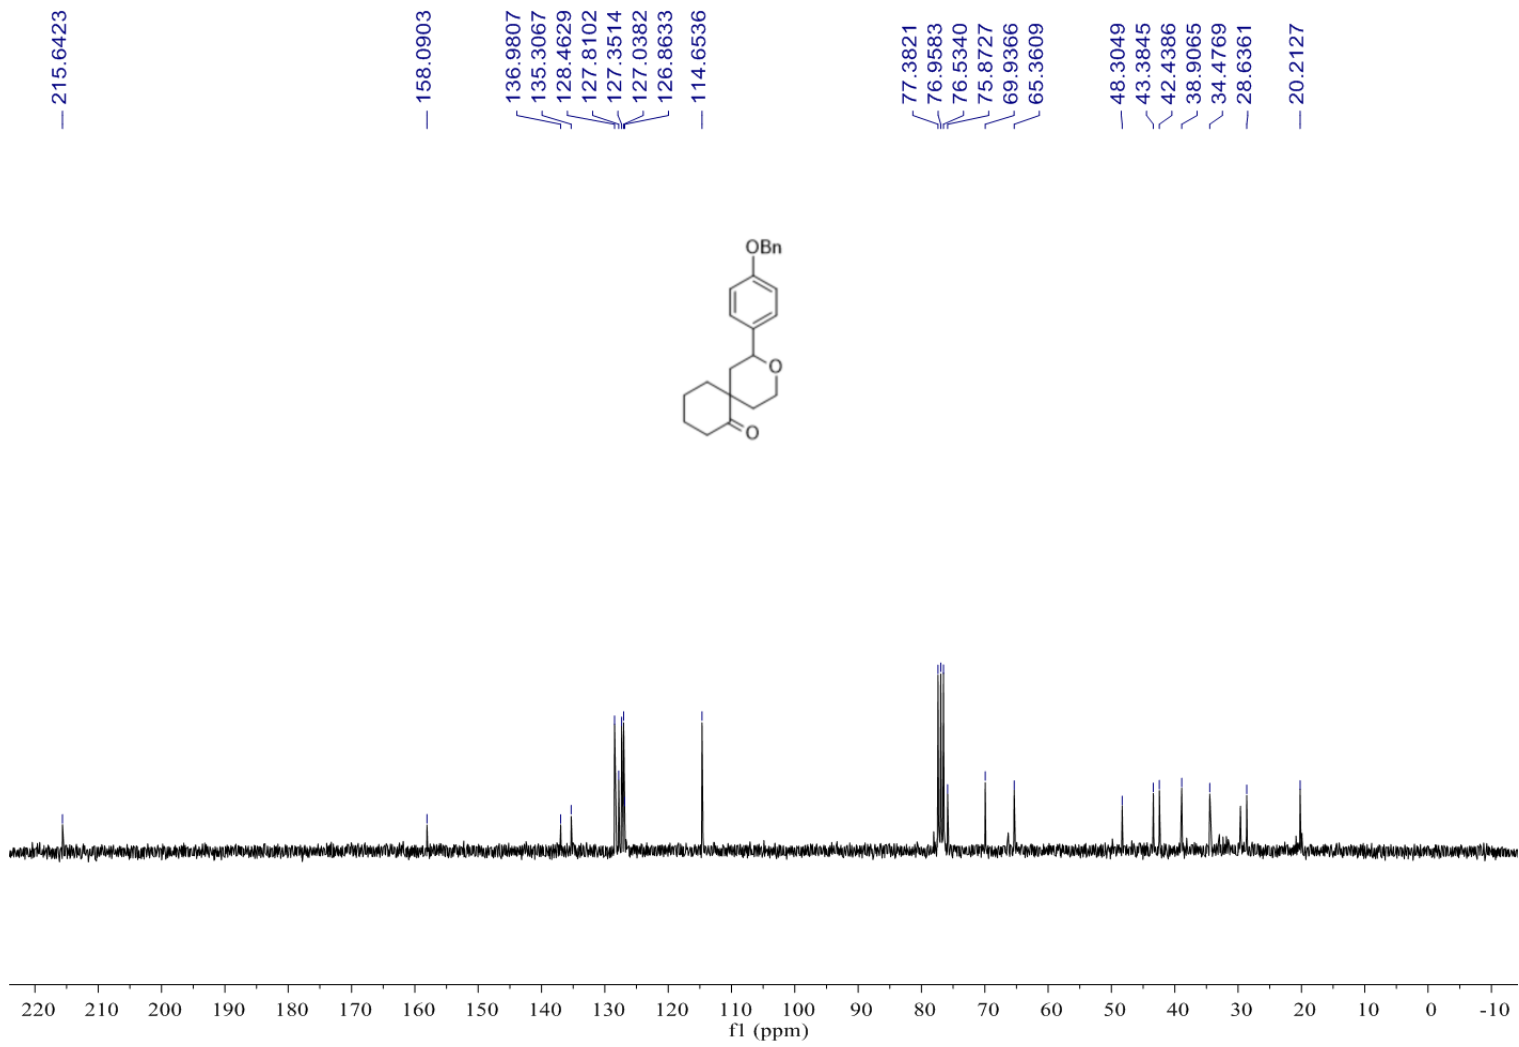

Compound **8da**

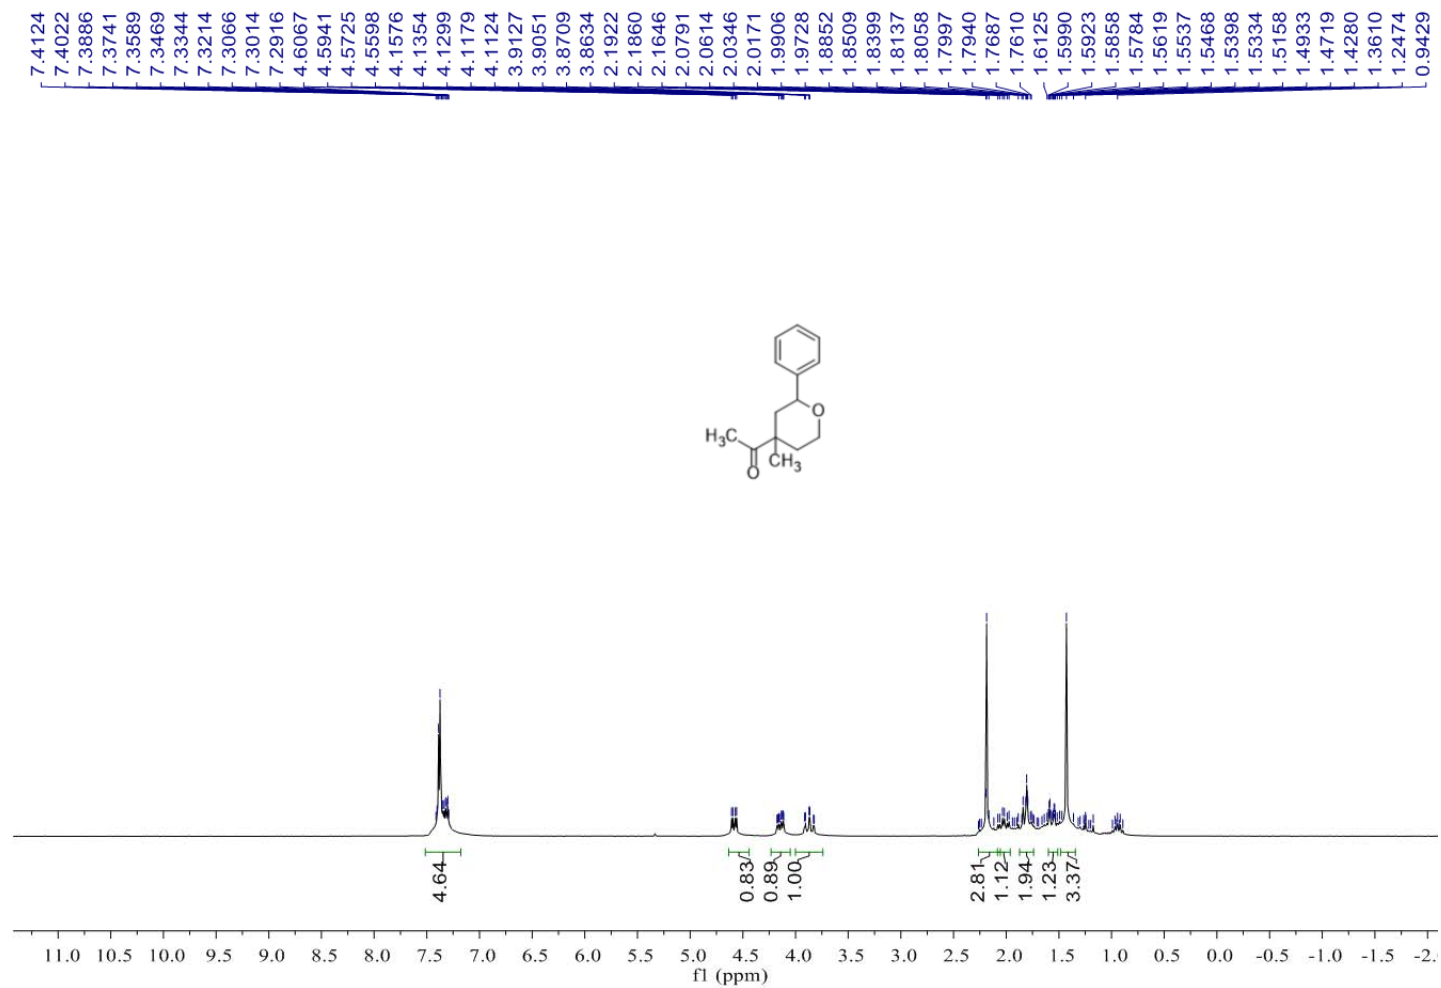

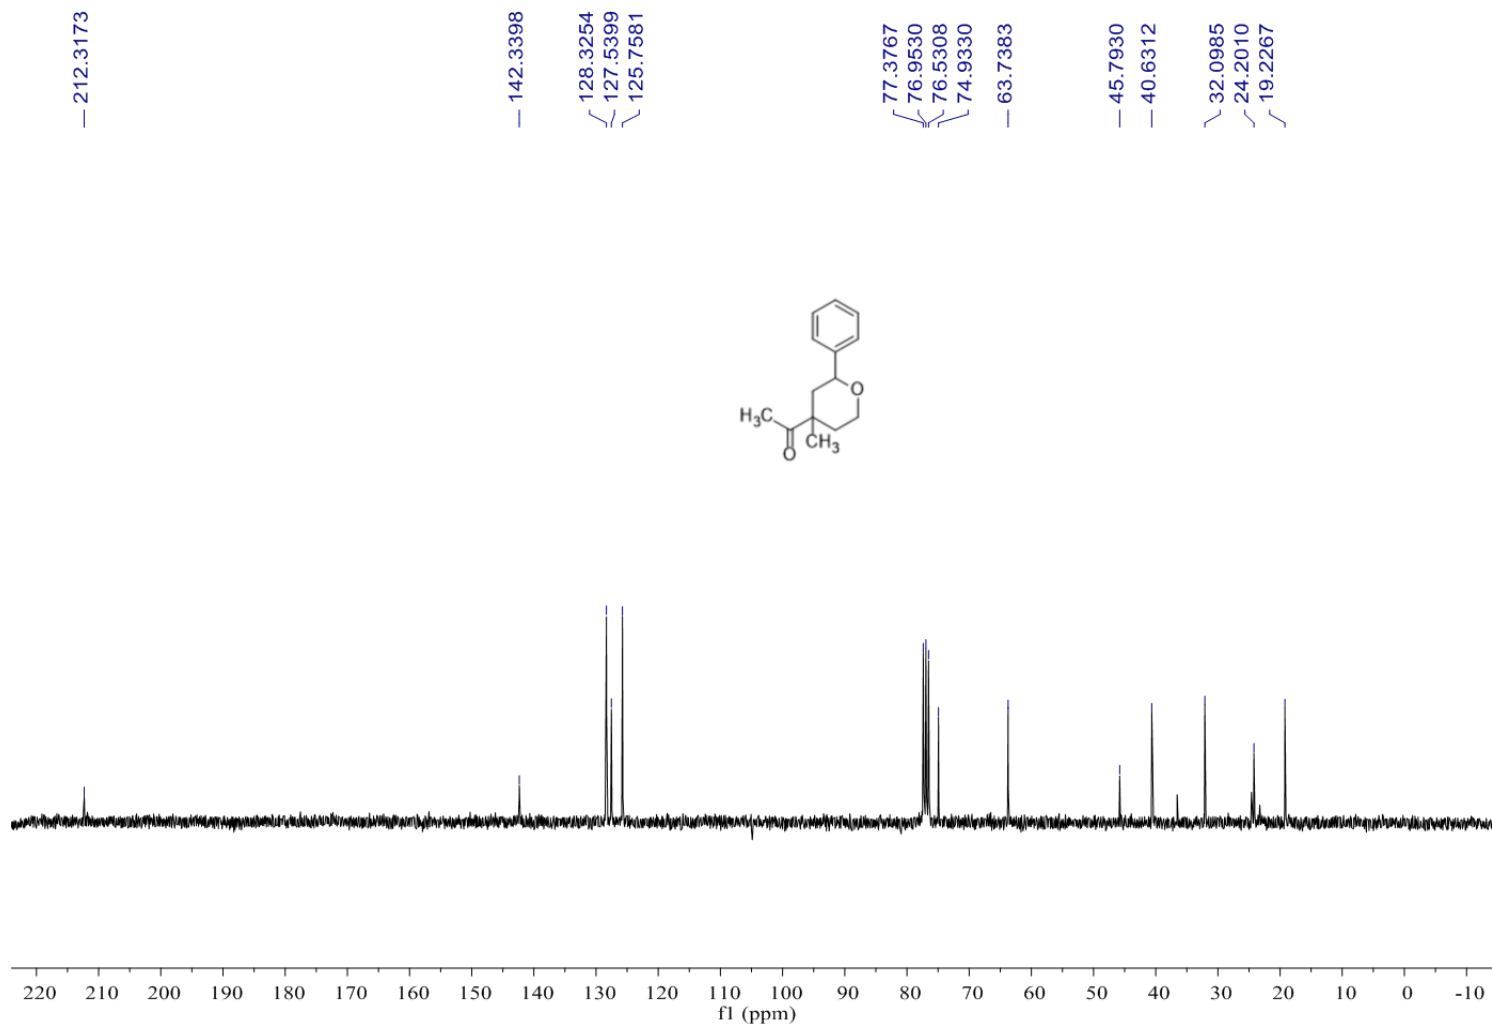

Compound 9

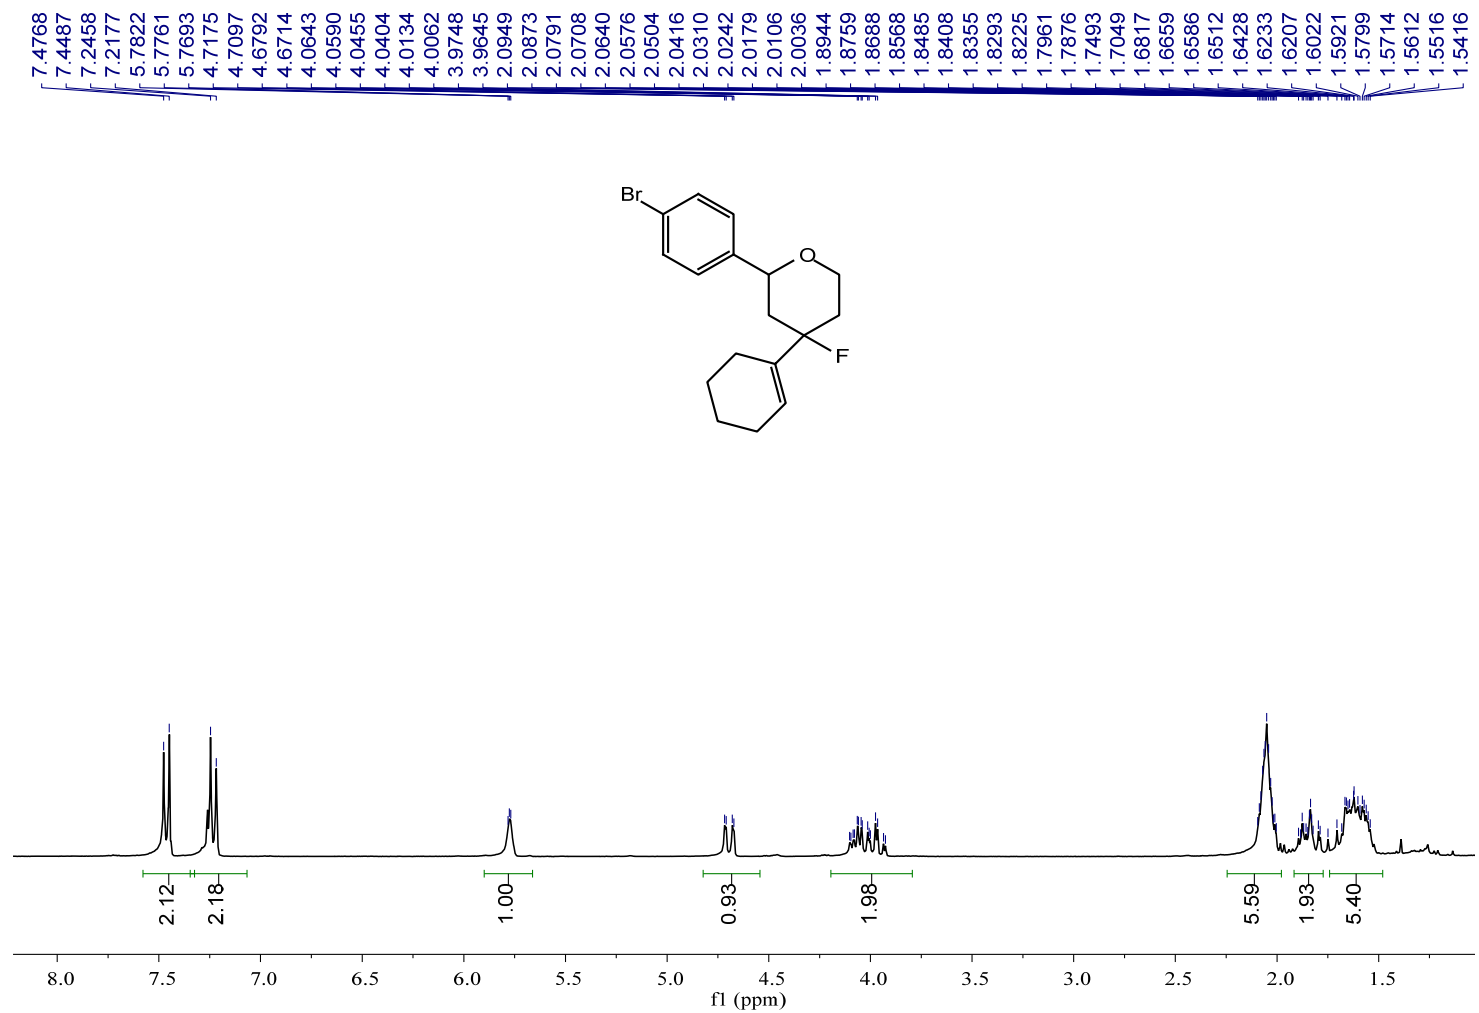



141.4051  
139.0427  
138.7827  
131.3837  
127.4007  
122.2106  
122.0811  
121.1471

95.5858  
93.3314

77.3567  
76.9325  
76.5107  
74.4555

63.8679

42.1993  
41.9011

33.8119  
33.5086

24.8407  
23.4012  
23.3438  
22.5299  
21.9896

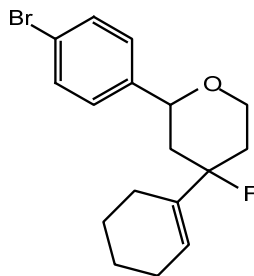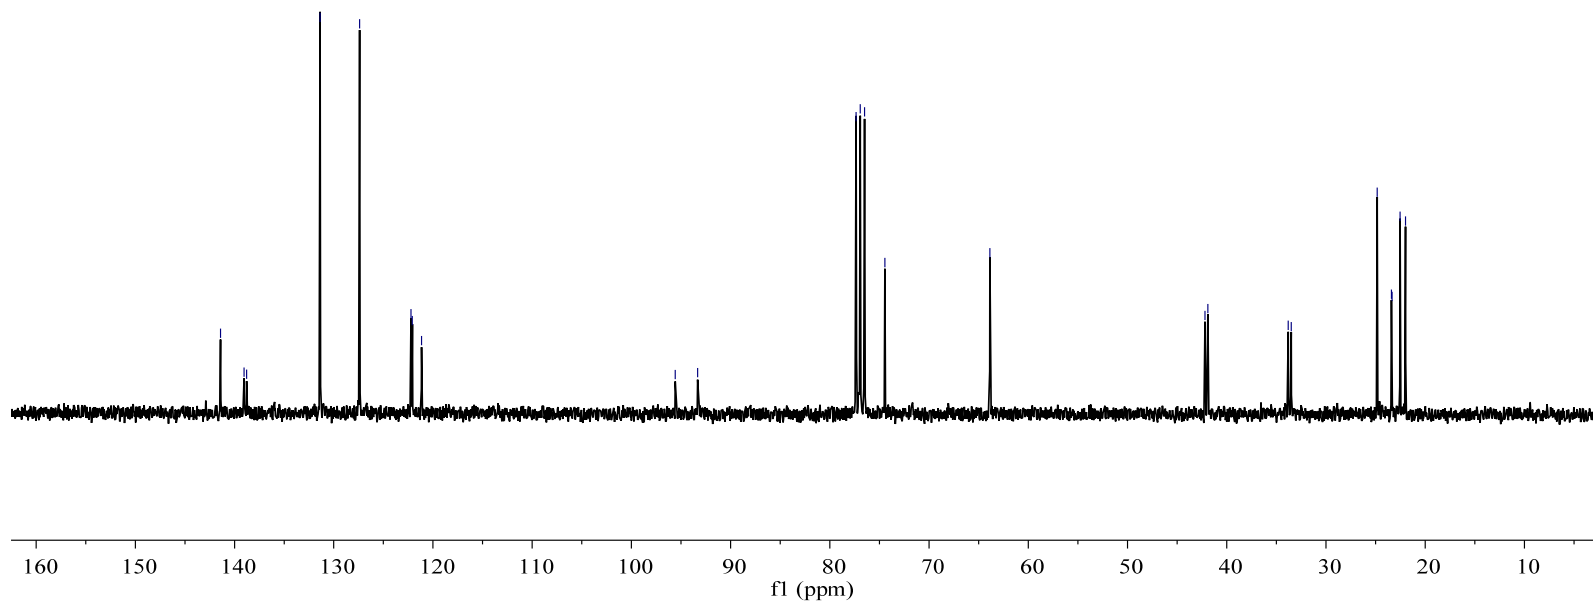

#### 4. X-ray crystallographic data

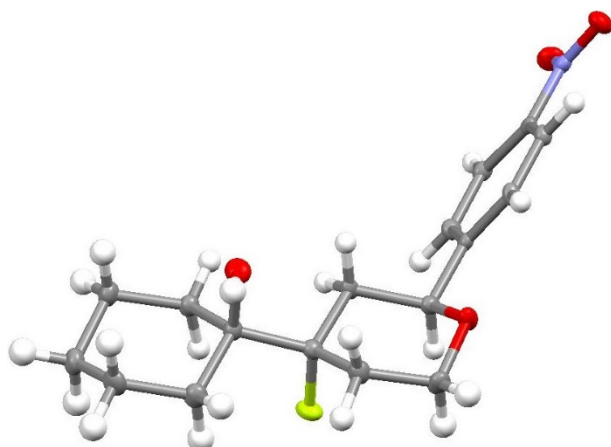

X-ray crystal structure of Product **7ab**

Table 1. Crystal data and structure refinement for f415.

|                                 |                                                       |                |
|---------------------------------|-------------------------------------------------------|----------------|
| Identification code             | f415                                                  |                |
| Empirical formula               | C <sub>17</sub> H <sub>23</sub> F N O <sub>4.50</sub> |                |
| Formula weight                  | 332.36                                                |                |
| Temperature                     | 100(2) K                                              |                |
| Wavelength                      | 0.71073 Å                                             |                |
| Crystal system                  | Triclinic                                             |                |
| Space group                     | P-1                                                   |                |
| Unit cell dimensions            | a = 7.6999(3) Å                                       | a = 99.119(2)° |
|                                 | b = 11.1232(5) Å                                      | b = 96.526(2)° |
|                                 | c = 18.8431(9) Å                                      | g = 94.243(2)° |
| Volume                          | 1576.16(12) Å <sup>3</sup>                            |                |
| Z                               | 4                                                     |                |
| Density (calculated)            | 1.401 Mg/m <sup>3</sup>                               |                |
| Absorption coefficient          | 0.108 mm <sup>-1</sup>                                |                |
| F(000)                          | 708                                                   |                |
| Crystal size                    | 0.386 x 0.352 x 0.074 mm <sup>3</sup>                 |                |
| Theta range for data collection | 2.207 to 28.281°                                      |                |
| Index ranges                    | -10 ≤ h ≤ 9, -14 ≤ k ≤ 14, -25 ≤ l ≤ 25               |                |
| Reflections collected           | 36644                                                 |                |
| Independent reflections         | 7841 [R(int) = 0.0510]                                |                |
| Completeness to theta = 25.242° | 99.9 %                                                |                |
| Absorption correction           | Semi-empirical from equivalents                       |                |
| Max. and min. transmission      | 0.7459 and 0.7037                                     |                |
| Refinement method               | Full-matrix least-squares on F <sup>2</sup>           |                |
| Data / restraints / parameters  | 7841 / 4 / 454                                        |                |

|                                      |                                    |
|--------------------------------------|------------------------------------|
| Goodness-of-fit on $F^2$             | 1.029                              |
| Final R indices [ $I > 2\sigma(I)$ ] | R1 = 0.0765, wR2 = 0.2009          |
| R indices (all data)                 | R1 = 0.1141, wR2 = 0.2250          |
| Extinction coefficient               | n/a                                |
| Largest diff. peak and hole          | 0.871 and -0.848 e.Å <sup>-3</sup> |

Table 2. Atomic coordinates ( $\times 10^4$ ) and equivalent isotropic displacement parameters ( $\text{Å}^2 \times 10^3$ ) for f415.  $U(\text{eq})$  is defined as one third of the trace of the orthogonalized  $U^{ij}$  tensor.

|       | x       | y        | z       | U(eq) |
|-------|---------|----------|---------|-------|
| F(1)  | 5650(2) | 6403(1)  | 8188(1) | 22(1) |
| F(2)  | 4864(2) | 1543(1)  | 8303(1) | 22(1) |
| O(1)  | 2411(3) | 6543(2)  | 8598(1) | 25(1) |
| O(2)  | 5908(2) | 7313(2)  | 6546(1) | 18(1) |
| O(3)  | 902(3)  | 4523(2)  | 3419(1) | 26(1) |
| O(4)  | 147(2)  | 2973(2)  | 3910(1) | 22(1) |
| O(5)  | 2104(3) | 3981(2)  | 8038(1) | 22(1) |
| O(6)  | 5826(2) | 2250(2)  | 6621(1) | 18(1) |
| O(7)  | 1078(2) | -473(2)  | 3417(1) | 22(1) |
| O(8)  | 366(2)  | -2067(2) | 3883(1) | 22(1) |
| N(1)  | 912(3)  | 3992(2)  | 3939(1) | 17(1) |
| N(2)  | 1073(3) | -1025(2) | 3928(1) | 15(1) |
| C(1)  | 3410(3) | 7644(2)  | 8520(1) | 16(1) |
| C(2)  | 2113(3) | 8547(2)  | 8313(1) | 17(1) |
| C(3)  | 950(3)  | 8871(2)  | 8915(1) | 20(1) |
| C(4)  | 2061(4) | 9358(3)  | 9638(1) | 22(1) |
| C(5)  | 3356(4) | 8471(3)  | 9842(1) | 23(1) |
| C(6)  | 4514(4) | 8159(3)  | 9247(1) | 22(1) |
| C(7)  | 6976(3) | 7866(3)  | 7205(1) | 20(1) |
| C(8)  | 5863(4) | 8326(2)  | 7796(1) | 19(1) |
| C(9)  | 4588(3) | 7298(2)  | 7922(1) | 14(1) |
| C(10) | 3569(3) | 6651(2)  | 7202(1) | 14(1) |
| C(11) | 4820(3) | 6283(2)  | 6651(1) | 14(1) |
| C(12) | 3799(3) | 5696(2)  | 5933(1) | 12(1) |
| C(13) | 3732(3) | 6279(2)  | 5331(1) | 13(1) |
| C(14) | 2780(3) | 5736(2)  | 4674(1) | 14(1) |
| C(15) | 1902(3) | 4590(2)  | 4632(1) | 13(1) |

|       |         |          |         |       |
|-------|---------|----------|---------|-------|
| C(16) | 1920(3) | 3987(2)  | 5222(1) | 15(1) |
| C(17) | 2879(3) | 4544(2)  | 5871(1) | 15(1) |
| C(18) | 2772(3) | 3045(2)  | 8404(1) | 14(1) |
| C(19) | 3685(4) | 3621(3)  | 9164(1) | 21(1) |
| C(20) | 2399(4) | 4111(3)  | 9678(1) | 23(1) |
| C(21) | 975(4)  | 3115(3)  | 9734(2) | 23(1) |
| C(22) | -2(3)   | 2606(3)  | 8986(1) | 21(1) |
| C(23) | 1252(3) | 2110(2)  | 8462(1) | 16(1) |
| C(24) | 6812(3) | 2767(3)  | 7308(1) | 22(1) |
| C(25) | 5630(3) | 3343(2)  | 7836(1) | 18(1) |
| C(26) | 4119(3) | 2441(2)  | 7930(1) | 15(1) |
| C(27) | 3248(3) | 1760(2)  | 7196(1) | 14(1) |
| C(28) | 4590(3) | 1287(2)  | 6709(1) | 14(1) |
| C(29) | 3682(3) | 689(2)   | 5973(1) | 13(1) |
| C(30) | 3706(3) | 1277(2)  | 5374(1) | 14(1) |
| C(31) | 2850(3) | 733(2)   | 4699(1) | 14(1) |
| C(32) | 1970(3) | -419(2)  | 4638(1) | 12(1) |
| C(33) | 1894(3) | -1023(2) | 5225(1) | 14(1) |
| C(34) | 2759(3) | -462(2)  | 5892(1) | 15(1) |
| O(1W) | 9131(4) | 5379(3)  | 8348(2) | 68(1) |

Table 3.

---

Bond lengths [Å] and angles [°] for f415.

---

|            |           |
|------------|-----------|
| F(1)-C(9)  | 1.448(3)  |
| F(2)-C(26) | 1.427(3)  |
| O(1)-C(1)  | 1.434(3)  |
| O(1)-H(10) | 0.850(10) |
| O(2)-C(11) | 1.422(3)  |
| O(2)-C(7)  | 1.431(3)  |
| O(3)-N(1)  | 1.221(3)  |
| O(4)-N(1)  | 1.228(3)  |
| O(5)-C(18) | 1.432(3)  |
| O(5)-H(5O) | 0.839(10) |
| O(6)-C(28) | 1.422(3)  |
| O(6)-C(24) | 1.434(3)  |
| O(7)-N(2)  | 1.220(3)  |
| O(8)-N(2)  | 1.230(3)  |
| N(1)-C(15) | 1.468(3)  |

|              |          |
|--------------|----------|
| N(2)-C(32)   | 1.469(3) |
| C(1)-C(6)    | 1.530(4) |
| C(1)-C(2)    | 1.531(3) |
| C(1)-C(9)    | 1.545(3) |
| C(2)-C(3)    | 1.539(3) |
| C(2)-H(2A)   | 0.9900   |
| C(2)-H(2B)   | 0.9900   |
| C(3)-C(4)    | 1.520(4) |
| C(3)-H(3A)   | 0.9900   |
| C(3)-H(3B)   | 0.9900   |
| C(4)-C(5)    | 1.515(4) |
| C(4)-H(4A)   | 0.9900   |
| C(4)-H(4B)   | 0.9900   |
| C(5)-C(6)    | 1.524(4) |
| C(5)-H(5A)   | 0.9900   |
| C(5)-H(5B)   | 0.9900   |
| C(6)-H(6A)   | 0.9900   |
| C(6)-H(6B)   | 0.9900   |
| C(7)-C(8)    | 1.529(4) |
| C(7)-H(7A)   | 0.9900   |
| C(7)-H(7B)   | 0.9900   |
| C(8)-C(9)    | 1.517(3) |
| C(8)-H(8A)   | 1.00(3)  |
| C(8)-H(8B)   | 0.87(3)  |
| C(9)-C(10)   | 1.529(3) |
| C(10)-C(11)  | 1.524(3) |
| C(10)-H(10A) | 0.9900   |
| C(10)-H(10B) | 0.9900   |
| C(11)-C(12)  | 1.509(3) |
| C(11)-H(11)  | 1.0000   |
| C(12)-C(13)  | 1.391(3) |
| C(12)-C(17)  | 1.398(3) |
| C(13)-C(14)  | 1.388(3) |
| C(13)-H(13)  | 0.9500   |
| C(14)-C(15)  | 1.384(3) |
| C(14)-H(14)  | 0.9500   |
| C(15)-C(16)  | 1.385(3) |
| C(16)-C(17)  | 1.383(3) |

|              |          |
|--------------|----------|
| C(16)-H(16)  | 0.9500   |
| C(17)-H(17)  | 0.9500   |
| C(18)-C(23)  | 1.532(3) |
| C(18)-C(19)  | 1.540(3) |
| C(18)-C(26)  | 1.565(3) |
| C(19)-C(20)  | 1.531(4) |
| C(19)-H(19A) | 0.9900   |
| C(19)-H(19B) | 0.9900   |
| C(20)-C(21)  | 1.524(4) |
| C(20)-H(20A) | 0.9900   |
| C(20)-H(20B) | 0.9900   |
| C(21)-C(22)  | 1.522(4) |
| C(21)-H(21A) | 0.9900   |
| C(21)-H(21B) | 0.9900   |
| C(22)-C(23)  | 1.527(3) |
| C(22)-H(22A) | 0.9900   |
| C(22)-H(22B) | 0.9900   |
| C(23)-H(23A) | 0.98(3)  |
| C(23)-H(23B) | 0.95(3)  |
| C(24)-C(25)  | 1.524(4) |
| C(24)-H(24A) | 0.9900   |
| C(24)-H(24B) | 0.9900   |
| C(25)-C(26)  | 1.524(3) |
| C(25)-H(25A) | 0.99(3)  |
| C(25)-H(25B) | 0.87(3)  |
| C(26)-C(27)  | 1.522(3) |
| C(27)-C(28)  | 1.526(3) |
| C(27)-H(27A) | 0.9900   |
| C(27)-H(27B) | 0.9900   |
| C(28)-C(29)  | 1.509(3) |
| C(28)-H(28)  | 1.0000   |
| C(29)-C(30)  | 1.393(3) |
| C(29)-C(34)  | 1.395(3) |
| C(30)-C(31)  | 1.387(3) |
| C(30)-H(30)  | 0.9500   |
| C(31)-C(32)  | 1.386(3) |
| C(31)-H(31)  | 0.9500   |
| C(32)-C(33)  | 1.387(3) |

|                  |            |
|------------------|------------|
| C(33)-C(34)      | 1.383(3)   |
| C(33)-H(33)      | 0.9500     |
| C(34)-H(34)      | 0.9500     |
| O(1W)-H(1W)      | 0.868(10)  |
| O(1W)-H(2W)      | 0.872(10)  |
| <br>             |            |
| C(1)-O(1)-H(10)  | 109(2)     |
| C(11)-O(2)-C(7)  | 111.19(18) |
| C(18)-O(5)-H(50) | 104(2)     |
| C(28)-O(6)-C(24) | 109.89(18) |
| O(3)-N(1)-O(4)   | 123.2(2)   |
| O(3)-N(1)-C(15)  | 118.6(2)   |
| O(4)-N(1)-C(15)  | 118.1(2)   |
| O(7)-N(2)-O(8)   | 123.8(2)   |
| O(7)-N(2)-C(32)  | 118.5(2)   |
| O(8)-N(2)-C(32)  | 117.7(2)   |
| O(1)-C(1)-C(6)   | 108.2(2)   |
| O(1)-C(1)-C(2)   | 107.7(2)   |
| C(6)-C(1)-C(2)   | 110.4(2)   |
| O(1)-C(1)-C(9)   | 107.23(19) |
| C(6)-C(1)-C(9)   | 111.2(2)   |
| C(2)-C(1)-C(9)   | 111.8(2)   |
| C(1)-C(2)-C(3)   | 110.8(2)   |
| C(1)-C(2)-H(2A)  | 109.5      |
| C(3)-C(2)-H(2A)  | 109.5      |
| C(1)-C(2)-H(2B)  | 109.5      |
| C(3)-C(2)-H(2B)  | 109.5      |
| H(2A)-C(2)-H(2B) | 108.1      |
| C(4)-C(3)-C(2)   | 111.0(2)   |
| C(4)-C(3)-H(3A)  | 109.4      |
| C(2)-C(3)-H(3A)  | 109.4      |
| C(4)-C(3)-H(3B)  | 109.4      |
| C(2)-C(3)-H(3B)  | 109.4      |
| H(3A)-C(3)-H(3B) | 108.0      |
| C(5)-C(4)-C(3)   | 111.8(2)   |
| C(5)-C(4)-H(4A)  | 109.3      |
| C(3)-C(4)-H(4A)  | 109.3      |
| C(5)-C(4)-H(4B)  | 109.3      |

|                     |            |
|---------------------|------------|
| C(3)-C(4)-H(4B)     | 109.3      |
| H(4A)-C(4)-H(4B)    | 107.9      |
| C(4)-C(5)-C(6)      | 110.9(2)   |
| C(4)-C(5)-H(5A)     | 109.5      |
| C(6)-C(5)-H(5A)     | 109.5      |
| C(4)-C(5)-H(5B)     | 109.5      |
| C(6)-C(5)-H(5B)     | 109.5      |
| H(5A)-C(5)-H(5B)    | 108.0      |
| C(5)-C(6)-C(1)      | 111.3(2)   |
| C(5)-C(6)-H(6A)     | 109.4      |
| C(1)-C(6)-H(6A)     | 109.4      |
| C(5)-C(6)-H(6B)     | 109.4      |
| C(1)-C(6)-H(6B)     | 109.4      |
| H(6A)-C(6)-H(6B)    | 108.0      |
| O(2)-C(7)-C(8)      | 111.7(2)   |
| O(2)-C(7)-H(7A)     | 109.3      |
| C(8)-C(7)-H(7A)     | 109.3      |
| O(2)-C(7)-H(7B)     | 109.3      |
| C(8)-C(7)-H(7B)     | 109.3      |
| H(7A)-C(7)-H(7B)    | 107.9      |
| C(9)-C(8)-C(7)      | 110.6(2)   |
| C(9)-C(8)-H(8A)     | 108.4(17)  |
| C(7)-C(8)-H(8A)     | 107.5(18)  |
| C(9)-C(8)-H(8B)     | 104(2)     |
| C(7)-C(8)-H(8B)     | 115(2)     |
| H(8A)-C(8)-H(8B)    | 111(3)     |
| F(1)-C(9)-C(8)      | 106.2(2)   |
| F(1)-C(9)-C(10)     | 105.84(19) |
| C(8)-C(9)-C(10)     | 110.3(2)   |
| F(1)-C(9)-C(1)      | 104.38(18) |
| C(8)-C(9)-C(1)      | 115.5(2)   |
| C(10)-C(9)-C(1)     | 113.7(2)   |
| C(11)-C(10)-C(9)    | 110.7(2)   |
| C(11)-C(10)-H(10A)  | 109.5      |
| C(9)-C(10)-H(10A)   | 109.5      |
| C(11)-C(10)-H(10B)  | 109.5      |
| C(9)-C(10)-H(10B)   | 109.5      |
| H(10A)-C(10)-H(10B) | 108.1      |



|                     |            |
|---------------------|------------|
| O(2)-C(11)-C(12)    | 108.93(18) |
| O(2)-C(11)-C(10)    | 111.19(19) |
| C(12)-C(11)-C(10)   | 110.33(19) |
| O(2)-C(11)-H(11)    | 108.8      |
| C(12)-C(11)-H(11)   | 108.8      |
| C(10)-C(11)-H(11)   | 108.8      |
| C(13)-C(12)-C(17)   | 119.0(2)   |
| C(13)-C(12)-C(11)   | 121.6(2)   |
| C(17)-C(12)-C(11)   | 119.4(2)   |
| C(14)-C(13)-C(12)   | 121.2(2)   |
| C(14)-C(13)-H(13)   | 119.4      |
| C(12)-C(13)-H(13)   | 119.4      |
| C(15)-C(14)-C(13)   | 118.0(2)   |
| C(15)-C(14)-H(14)   | 121.0      |
| C(13)-C(14)-H(14)   | 121.0      |
| C(14)-C(15)-C(16)   | 122.4(2)   |
| C(14)-C(15)-N(1)    | 118.9(2)   |
| C(16)-C(15)-N(1)    | 118.7(2)   |
| C(17)-C(16)-C(15)   | 118.5(2)   |
| C(17)-C(16)-H(16)   | 120.7      |
| C(15)-C(16)-H(16)   | 120.7      |
| C(16)-C(17)-C(12)   | 120.7(2)   |
| C(16)-C(17)-H(17)   | 119.6      |
| C(12)-C(17)-H(17)   | 119.6      |
| O(5)-C(18)-C(23)    | 109.3(2)   |
| O(5)-C(18)-C(19)    | 109.6(2)   |
| C(23)-C(18)-C(19)   | 110.2(2)   |
| O(5)-C(18)-C(26)    | 106.04(18) |
| C(23)-C(18)-C(26)   | 111.0(2)   |
| C(19)-C(18)-C(26)   | 110.7(2)   |
| C(20)-C(19)-C(18)   | 113.0(2)   |
| C(20)-C(19)-H(19A)  | 109.0      |
| C(18)-C(19)-H(19A)  | 109.0      |
| C(20)-C(19)-H(19B)  | 109.0      |
| C(18)-C(19)-H(19B)  | 109.0      |
| H(19A)-C(19)-H(19B) | 107.8      |
| C(21)-C(20)-C(19)   | 111.1(2)   |
| C(21)-C(20)-H(20A)  | 109.4      |

|                     |            |
|---------------------|------------|
| C(19)-C(20)-H(20A)  | 109.4      |
| C(21)-C(20)-H(20B)  | 109.4      |
| C(19)-C(20)-H(20B)  | 109.4      |
| H(20A)-C(20)-H(20B) | 108.0      |
| C(22)-C(21)-C(20)   | 110.0(2)   |
| C(22)-C(21)-H(21A)  | 109.7      |
| C(20)-C(21)-H(21A)  | 109.7      |
| C(22)-C(21)-H(21B)  | 109.7      |
| C(20)-C(21)-H(21B)  | 109.7      |
| H(21A)-C(21)-H(21B) | 108.2      |
| C(21)-C(22)-C(23)   | 111.3(2)   |
| C(21)-C(22)-H(22A)  | 109.4      |
| C(23)-C(22)-H(22A)  | 109.4      |
| C(21)-C(22)-H(22B)  | 109.4      |
| C(23)-C(22)-H(22B)  | 109.4      |
| H(22A)-C(22)-H(22B) | 108.0      |
| C(22)-C(23)-C(18)   | 113.6(2)   |
| C(22)-C(23)-H(23A)  | 113.1(17)  |
| C(18)-C(23)-H(23A)  | 97.7(17)   |
| C(22)-C(23)-H(23B)  | 108.9(18)  |
| C(18)-C(23)-H(23B)  | 108.0(18)  |
| H(23A)-C(23)-H(23B) | 115(2)     |
| O(6)-C(24)-C(25)    | 111.3(2)   |
| O(6)-C(24)-H(24A)   | 109.4      |
| C(25)-C(24)-H(24A)  | 109.4      |
| O(6)-C(24)-H(24B)   | 109.4      |
| C(25)-C(24)-H(24B)  | 109.4      |
| H(24A)-C(24)-H(24B) | 108.0      |
| C(24)-C(25)-C(26)   | 112.0(2)   |
| C(24)-C(25)-H(25A)  | 107.4(18)  |
| C(26)-C(25)-H(25A)  | 110.6(18)  |
| C(24)-C(25)-H(25B)  | 116(2)     |
| C(26)-C(25)-H(25B)  | 102(2)     |
| H(25A)-C(25)-H(25B) | 108(3)     |
| F(2)-C(26)-C(27)    | 106.29(19) |
| F(2)-C(26)-C(25)    | 107.0(2)   |
| C(27)-C(26)-C(25)   | 110.5(2)   |
| F(2)-C(26)-C(18)    | 106.98(18) |

|                     |            |
|---------------------|------------|
| C(27)-C(26)-C(18)   | 112.6(2)   |
| C(25)-C(26)-C(18)   | 113.0(2)   |
| C(26)-C(27)-C(28)   | 112.08(19) |
| C(26)-C(27)-H(27A)  | 109.2      |
| C(28)-C(27)-H(27A)  | 109.2      |
| C(26)-C(27)-H(27B)  | 109.2      |
| C(28)-C(27)-H(27B)  | 109.2      |
| H(27A)-C(27)-H(27B) | 107.9      |
| O(6)-C(28)-C(29)    | 108.80(19) |
| O(6)-C(28)-C(27)    | 111.3(2)   |
| C(29)-C(28)-C(27)   | 110.38(19) |
| O(6)-C(28)-H(28)    | 108.8      |
| C(29)-C(28)-H(28)   | 108.8      |
| C(27)-C(28)-H(28)   | 108.8      |
| C(30)-C(29)-C(34)   | 119.2(2)   |
| C(30)-C(29)-C(28)   | 121.3(2)   |
| C(34)-C(29)-C(28)   | 119.5(2)   |
| C(31)-C(30)-C(29)   | 121.2(2)   |
| C(31)-C(30)-H(30)   | 119.4      |
| C(29)-C(30)-H(30)   | 119.4      |
| C(32)-C(31)-C(30)   | 117.9(2)   |
| C(32)-C(31)-H(31)   | 121.1      |
| C(30)-C(31)-H(31)   | 121.1      |
| C(31)-C(32)-C(33)   | 122.5(2)   |
| C(31)-C(32)-N(2)    | 119.1(2)   |
| C(33)-C(32)-N(2)    | 118.4(2)   |
| C(34)-C(33)-C(32)   | 118.6(2)   |
| C(34)-C(33)-H(33)   | 120.7      |
| C(32)-C(33)-H(33)   | 120.7      |
| C(33)-C(34)-C(29)   | 120.7(2)   |
| C(33)-C(34)-H(34)   | 119.7      |
| C(29)-C(34)-H(34)   | 119.7      |
| H(1W)-O(1W)-H(2W)   | 121(5)     |

---

Symmetry transformations used to generate equivalent atoms:

Table 4. Anisotropic displacement parameters ( $\text{\AA}^2 \times 10^3$ ) for f415. The anisotropic displacement factor exponent takes the form:  $-2p^2 [ h^2 a^* 2U^{11} + \dots + 2 h k a^* b^* U^{12} ]$

|       | U11   | U22   | U33   | U23   | U13   | U12   |
|-------|-------|-------|-------|-------|-------|-------|
| F(1)  | 26(1) | 21(1) | 21(1) | 7(1)  | 2(1)  | 7(1)  |
| F(2)  | 27(1) | 21(1) | 18(1) | 6(1)  | -2(1) | 7(1)  |
| O(1)  | 30(1) | 18(1) | 31(1) | 6(1)  | 14(1) | -2(1) |
| O(2)  | 16(1) | 20(1) | 18(1) | 3(1)  | 4(1)  | -5(1) |
| O(3)  | 27(1) | 33(1) | 17(1) | 8(1)  | -1(1) | 1(1)  |
| O(4)  | 16(1) | 24(1) | 24(1) | -1(1) | 0(1)  | -5(1) |
| O(5)  | 28(1) | 14(1) | 24(1) | 4(1)  | 3(1)  | 4(1)  |
| O(6)  | 14(1) | 21(1) | 16(1) | 1(1)  | 3(1)  | -6(1) |
| O(7)  | 24(1) | 26(1) | 14(1) | 5(1)  | 0(1)  | -2(1) |
| O(8)  | 21(1) | 17(1) | 24(1) | -2(1) | -3(1) | -5(1) |
| N(1)  | 9(1)  | 25(1) | 16(1) | 2(1)  | 2(1)  | 3(1)  |
| N(2)  | 10(1) | 19(1) | 17(1) | 0(1)  | 2(1)  | 3(1)  |
| C(1)  | 17(1) | 14(1) | 18(1) | 3(1)  | 6(1)  | -1(1) |
| C(2)  | 13(1) | 17(1) | 20(1) | 0(1)  | -1(1) | 2(1)  |
| C(3)  | 18(1) | 20(1) | 24(1) | 4(1)  | 5(1)  | 6(1)  |
| C(4)  | 24(1) | 24(1) | 20(1) | 3(1)  | 6(1)  | 4(1)  |
| C(5)  | 24(1) | 29(2) | 17(1) | 4(1)  | 4(1)  | 6(1)  |
| C(6)  | 22(1) | 28(1) | 17(1) | 5(1)  | 3(1)  | 5(1)  |
| C(7)  | 14(1) | 23(1) | 20(1) | 1(1)  | 1(1)  | -5(1) |
| C(8)  | 22(1) | 18(1) | 16(1) | 1(1)  | 4(1)  | -7(1) |
| C(9)  | 15(1) | 13(1) | 16(1) | 4(1)  | 3(1)  | 2(1)  |
| C(10) | 14(1) | 16(1) | 12(1) | 2(1)  | 4(1)  | -2(1) |
| C(11) | 13(1) | 15(1) | 14(1) | 4(1)  | 3(1)  | 0(1)  |
| C(12) | 9(1)  | 14(1) | 14(1) | 2(1)  | 4(1)  | 3(1)  |
| C(13) | 15(1) | 10(1) | 17(1) | 3(1)  | 8(1)  | 1(1)  |
| C(14) | 16(1) | 16(1) | 14(1) | 5(1)  | 6(1)  | 4(1)  |
| C(15) | 9(1)  | 17(1) | 13(1) | 0(1)  | 2(1)  | 3(1)  |
| C(16) | 11(1) | 15(1) | 21(1) | 4(1)  | 4(1)  | -1(1) |
| C(17) | 14(1) | 14(1) | 16(1) | 6(1)  | 4(1)  | 1(1)  |
| C(18) | 14(1) | 14(1) | 15(1) | 2(1)  | 2(1)  | -1(1) |
| C(19) | 19(1) | 22(1) | 21(1) | -2(1) | 1(1)  | -2(1) |
| C(20) | 25(1) | 25(1) | 17(1) | -5(1) | 2(1)  | -3(1) |
| C(21) | 22(1) | 26(1) | 22(1) | 2(1)  | 9(1)  | 3(1)  |
| C(22) | 17(1) | 25(1) | 23(1) | 3(1)  | 6(1)  | 1(1)  |
| C(23) | 14(1) | 16(1) | 17(1) | 1(1)  | 3(1)  | -1(1) |

|       |       |       |       |       |      |       |
|-------|-------|-------|-------|-------|------|-------|
| C(24) | 13(1) | 29(2) | 21(1) | -1(1) | 0(1) | -3(1) |
| C(25) | 17(1) | 17(1) | 19(1) | 0(1)  | 2(1) | -5(1) |
| C(26) | 16(1) | 15(1) | 15(1) | 4(1)  | 2(1) | -1(1) |
| C(27) | 12(1) | 16(1) | 13(1) | 2(1)  | 2(1) | -4(1) |
| C(28) | 13(1) | 16(1) | 15(1) | 4(1)  | 1(1) | -1(1) |
| C(29) | 10(1) | 14(1) | 14(1) | 2(1)  | 4(1) | 2(1)  |
| C(30) | 16(1) | 10(1) | 16(1) | 2(1)  | 6(1) | -2(1) |
| C(31) | 15(1) | 14(1) | 14(1) | 4(1)  | 4(1) | 1(1)  |
| C(32) | 8(1)  | 15(1) | 13(1) | -1(1) | 2(1) | 2(1)  |
| C(33) | 12(1) | 12(1) | 20(1) | 4(1)  | 3(1) | -1(1) |
| C(34) | 16(1) | 13(1) | 16(1) | 5(1)  | 3(1) | 0(1)  |
| O(1W) | 42(2) | 87(3) | 79(2) | 19(2) | 7(2) | 18(2) |

Table 5.

Hydrogen coordinates ( $\times 10^4$ ) and isotropic displacement parameters ( $\text{\AA}^2 \times 10^{-3}$ ) for f415.

|        | x        | y        | z        | U(eq) |
|--------|----------|----------|----------|-------|
| H(1O)  | 1325(17) | 6650(30) | 8530(18) | 30    |
| H(5O)  | 2670(40) | 4625(18) | 8266(15) | 26    |
| H(2A)  | 1363     | 8182     | 7857     | 21    |
| H(2B)  | 2769     | 9302     | 8230     | 21    |
| H(3A)  | 177      | 9496     | 8785     | 24    |
| H(3B)  | 195      | 8134     | 8960     | 24    |
| H(4A)  | 2710     | 10147    | 9609     | 27    |
| H(4B)  | 1283     | 9509     | 10020    | 27    |
| H(5A)  | 2709     | 7713     | 9924     | 27    |
| H(5B)  | 4102     | 8839     | 10299    | 27    |
| H(6A)  | 5309     | 7550     | 9383     | 26    |
| H(6B)  | 5246     | 8904     | 9198     | 26    |
| H(7A)  | 7747     | 8561     | 7111     | 24    |
| H(7B)  | 7734     | 7262     | 7376     | 24    |
| H(8A)  | 6680(40) | 8610(30) | 8253(17) | 23    |
| H(8B)  | 5190(40) | 8890(30) | 7697(17) | 23    |
| H(10A) | 2868     | 5913     | 7282     | 17    |
| H(10B) | 2750     | 7202     | 7011     | 17    |
| H(11)  | 5581     | 5679     | 6834     | 17    |

|        |          |          |          |    |
|--------|----------|----------|----------|----|
| H(13)  | 4349     | 7063     | 5371     | 16 |
| H(14)  | 2732     | 6139     | 4265     | 17 |
| H(16)  | 1288     | 3207     | 5181     | 18 |
| H(17)  | 2914     | 4140     | 6280     | 18 |
| H(19A) | 4334     | 2999     | 9376     | 26 |
| H(19B) | 4551     | 4300     | 9120     | 26 |
| H(20A) | 3047     | 4422     | 10165    | 28 |
| H(20B) | 1848     | 4800     | 9499     | 28 |
| H(21A) | 1513     | 2449     | 9946     | 28 |
| H(21B) | 140      | 3458     | 10057    | 28 |
| H(22A) | -617     | 3259     | 8793     | 25 |
| H(22B) | -897     | 1941     | 9025     | 25 |
| H(23A) | 1960(40) | 1490(30) | 8641(16) | 19 |
| H(23B) | 610(40)  | 1860(30) | 7992(17) | 19 |
| H(24A) | 7723     | 3397     | 7236     | 26 |
| H(24B) | 7410     | 2120     | 7514     | 26 |
| H(25A) | 6370(40) | 3640(30) | 8305(17) | 22 |
| H(25B) | 5080(40) | 3950(30) | 7712(17) | 22 |
| H(27A) | 2530     | 2315     | 6953     | 17 |
| H(27B) | 2453     | 1062     | 7269     | 17 |
| H(28)  | 5233     | 667      | 6936     | 17 |
| H(30)  | 4321     | 2065     | 5428     | 17 |
| H(31)  | 2867     | 1136     | 4291     | 17 |
| H(33)  | 1262     | -1806    | 5169     | 17 |
| H(34)  | 2724     | -865     | 6299     | 18 |
| H(1W)  | 8200(40) | 5770(40) | 8300(30) | 82 |
| H(2W)  | 9580(70) | 5050(40) | 7969(18) | 82 |

Table 6.

Torsion angles [°] for f415.

|                     |          |
|---------------------|----------|
| O(1)-C(1)-C(2)-C(3) | 62.1(3)  |
| C(6)-C(1)-C(2)-C(3) | -55.9(3) |
| C(9)-C(1)-C(2)-C(3) | 179.7(2) |
| C(1)-C(2)-C(3)-C(4) | 55.4(3)  |
| C(2)-C(3)-C(4)-C(5) | -55.4(3) |
| C(3)-C(4)-C(5)-C(6) | 55.8(3)  |
| C(4)-C(5)-C(6)-C(1) | -56.4(3) |
| O(1)-C(1)-C(6)-C(5) | -61.1(3) |

|                         |             |
|-------------------------|-------------|
| C(2)-C(1)-C(6)-C(5)     | 56.7(3)     |
| C(9)-C(1)-C(6)-C(5)     | -178.6(2)   |
| C(11)-O(2)-C(7)-C(8)    | -61.0(3)    |
| O(2)-C(7)-C(8)-C(9)     | 55.6(3)     |
| C(7)-C(8)-C(9)-F(1)     | 63.7(3)     |
| C(7)-C(8)-C(9)-C(10)    | -50.5(3)    |
| C(7)-C(8)-C(9)-C(1)     | 178.8(2)    |
| O(1)-C(1)-C(9)-F(1)     | -59.2(2)    |
| C(6)-C(1)-C(9)-F(1)     | 58.9(2)     |
| C(2)-C(1)-C(9)-F(1)     | -177.10(19) |
| O(1)-C(1)-C(9)-C(8)     | -175.4(2)   |
| C(6)-C(1)-C(9)-C(8)     | -57.2(3)    |
| C(2)-C(1)-C(9)-C(8)     | 66.7(3)     |
| O(1)-C(1)-C(9)-C(10)    | 55.6(3)     |
| C(6)-C(1)-C(9)-C(10)    | 173.8(2)    |
| C(2)-C(1)-C(9)-C(10)    | -62.3(3)    |
| F(1)-C(9)-C(10)-C(11)   | -63.3(2)    |
| C(8)-C(9)-C(10)-C(11)   | 51.2(3)     |
| C(1)-C(9)-C(10)-C(11)   | -177.23(19) |
| C(7)-O(2)-C(11)-C(12)   | -176.92(19) |
| C(7)-O(2)-C(11)-C(10)   | 61.3(3)     |
| C(9)-C(10)-C(11)-O(2)   | -56.5(3)    |
| C(9)-C(10)-C(11)-C(12)  | -177.47(19) |
| O(2)-C(11)-C(12)-C(13)  | -12.3(3)    |
| C(10)-C(11)-C(12)-C(13) | 110.0(2)    |
| O(2)-C(11)-C(12)-C(17)  | 168.5(2)    |
| C(10)-C(11)-C(12)-C(17) | -69.2(3)    |
| C(17)-C(12)-C(13)-C(14) | -0.3(3)     |
| C(11)-C(12)-C(13)-C(14) | -179.5(2)   |
| C(12)-C(13)-C(14)-C(15) | -0.3(3)     |
| C(13)-C(14)-C(15)-C(16) | 1.1(4)      |
| C(13)-C(14)-C(15)-N(1)  | -179.0(2)   |
| O(3)-N(1)-C(15)-C(14)   | 0.3(3)      |
| O(4)-N(1)-C(15)-C(14)   | 179.7(2)    |
| O(3)-N(1)-C(15)-C(16)   | -179.7(2)   |
| O(4)-N(1)-C(15)-C(16)   | -0.4(3)     |
| C(14)-C(15)-C(16)-C(17) | -1.2(4)     |
| N(1)-C(15)-C(16)-C(17)  | 178.9(2)    |

|                         |             |
|-------------------------|-------------|
| C(15)-C(16)-C(17)-C(12) | 0.5(4)      |
| C(13)-C(12)-C(17)-C(16) | 0.2(4)      |
| C(11)-C(12)-C(17)-C(16) | 179.5(2)    |
| O(5)-C(18)-C(19)-C(20)  | 69.3(3)     |
| C(23)-C(18)-C(19)-C(20) | -50.9(3)    |
| C(26)-C(18)-C(19)-C(20) | -174.1(2)   |
| C(18)-C(19)-C(20)-C(21) | 55.6(3)     |
| C(19)-C(20)-C(21)-C(22) | -57.7(3)    |
| C(20)-C(21)-C(22)-C(23) | 57.2(3)     |
| C(21)-C(22)-C(23)-C(18) | -54.9(3)    |
| O(5)-C(18)-C(23)-C(22)  | -69.8(3)    |
| C(19)-C(18)-C(23)-C(22) | 50.7(3)     |
| C(26)-C(18)-C(23)-C(22) | 173.6(2)    |
| C(28)-O(6)-C(24)-C(25)  | -62.9(3)    |
| O(6)-C(24)-C(25)-C(26)  | 55.1(3)     |
| C(24)-C(25)-C(26)-F(2)  | 68.7(3)     |
| C(24)-C(25)-C(26)-C(27) | -46.6(3)    |
| C(24)-C(25)-C(26)-C(18) | -173.8(2)   |
| O(5)-C(18)-C(26)-F(2)   | 177.25(18)  |
| C(23)-C(18)-C(26)-F(2)  | -64.2(2)    |
| C(19)-C(18)-C(26)-F(2)  | 58.5(2)     |
| O(5)-C(18)-C(26)-C(27)  | -66.3(2)    |
| C(23)-C(18)-C(26)-C(27) | 52.2(3)     |
| C(19)-C(18)-C(26)-C(27) | 174.9(2)    |
| O(5)-C(18)-C(26)-C(25)  | 59.8(3)     |
| C(23)-C(18)-C(26)-C(25) | 178.3(2)    |
| C(19)-C(18)-C(26)-C(25) | -59.0(3)    |
| F(2)-C(26)-C(27)-C(28)  | -69.1(2)    |
| C(25)-C(26)-C(27)-C(28) | 46.7(3)     |
| C(18)-C(26)-C(27)-C(28) | 174.12(19)  |
| C(24)-O(6)-C(28)-C(29)  | -175.17(19) |
| C(24)-O(6)-C(28)-C(27)  | 63.0(2)     |
| C(26)-C(27)-C(28)-O(6)  | -55.6(3)    |
| C(26)-C(27)-C(28)-C(29) | -176.48(19) |
| O(6)-C(28)-C(29)-C(30)  | -18.3(3)    |
| C(27)-C(28)-C(29)-C(30) | 104.0(3)    |
| O(6)-C(28)-C(29)-C(34)  | 163.4(2)    |
| C(27)-C(28)-C(29)-C(34) | -74.2(3)    |



|                         |           |
|-------------------------|-----------|
| C(34)-C(29)-C(30)-C(31) | -0.8(4)   |
| C(28)-C(29)-C(30)-C(31) | -179.1(2) |
| C(29)-C(30)-C(31)-C(32) | -0.1(4)   |
| C(30)-C(31)-C(32)-C(33) | 1.1(4)    |
| C(30)-C(31)-C(32)-N(2)  | -179.1(2) |
| O(7)-N(2)-C(32)-C(31)   | -2.7(3)   |
| O(8)-N(2)-C(32)-C(31)   | 176.9(2)  |
| O(7)-N(2)-C(32)-C(33)   | 177.1(2)  |
| O(8)-N(2)-C(32)-C(33)   | -3.3(3)   |
| C(31)-C(32)-C(33)-C(34) | -1.2(4)   |
| N(2)-C(32)-C(33)-C(34)  | 179.1(2)  |
| C(32)-C(33)-C(34)-C(29) | 0.2(4)    |
| C(30)-C(29)-C(34)-C(33) | 0.8(4)    |
| C(28)-C(29)-C(34)-C(33) | 179.1(2)  |

---

Symmetry transformations used to generate equivalent atoms:

Table 7. Hydrogen bonds for f415 [Å and °].

| D-H...A              | d(D-H)    | d(H...A)  | d(D...A) | <(DHA) |
|----------------------|-----------|-----------|----------|--------|
| O(1)-H(10)...O(1W)#1 | 0.850(10) | 2.08(3)   | 2.708(4) | 130(3) |
| O(5)-H(5O)...O(1)    | 0.839(10) | 2.16(2)   | 2.861(3) | 141(3) |
| O(1W)-H(1W)...F(1)   | 0.868(10) | 2.134(14) | 2.991(3) | 169(5) |
| O(1W)-H(2W)...O(5)#2 | 0.872(10) | 2.35(5)   | 2.923(4) | 123(4) |

---

Symmetry transformations used to generate equivalent atoms:

#1  $x-1, y, z$     #2  $x+1, y, z$

## 5. Reference

- (1) Y. Liu and Y.-Y. Yeung, *Org. Lett.*, 2017, **19**, 1422-1425.
